# Supplementary material
Source: publisher site journal article supplement (https://www.spandidos-publications.com/4314/downloadSupplementary)
Supplement: Supplementary file 1 [file downloadSupplementary]

## Sheet: Sheet 1
Table SVI. DEGs in PEA2 Ctrl vs. PEA1 Ctrl cells (P<0.05, abs logFC >0.58)
Ill_ID	Chr	Band	Symbol	Name	EntrezID	logFC	P.Value	adj.P.Val
ILMN_1700081	5	5q11.2	FST	follistatin	10468	9.05896	9.28574e-19	5.33559e-15
ILMN_2067656	12	12p13.32	CCND2	cyclin D2	894	8.89664	1.82927e-19	2.99577e-15
ILMN_1720048	17	17q12	CCL2	C-C motif chemokine ligand 2	6347	8.5565	5.78987e-18	1.4258e-14
ILMN_1719236	16	16q21	CDH5	cadherin 5	1003	8.37321	3.31939e-19	2.99577e-15
ILMN_1681780	10	10p12.1	MKX	mohawk homeobox	283078	8.30681	2.16234e-18	8.28321e-15
ILMN_1807439	15	15q26.3	ALDH1A3	aldehyde dehydrogenase 1 family member A3	220	8.15482	8.05095e-19	5.33559e-15
ILMN_1791890	11	11p15.2	SPON1	spondin 1	10418	8.08606	3.71404e-15	1.16922e-12
ILMN_1801442	12	12q13.13	KRT81	keratin 81	3887	7.99459	4.73142e-16	2.81242e-13
ILMN_1730777	17	17q21.2	KRT19	keratin 19	3880	7.93655	1.3636e-17	2.76539e-14
ILMN_2143685	17	17p13.1	CLDN7	claudin 7	1366	7.92032	2.69797e-15	9.37969e-13
ILMN_1774685	1	1q32.1	IL24	interleukin 24	11009	7.71369	2.67674e-18	8.56055e-15
ILMN_2052373	2	2q37.3	RAB17	RAB17, member RAS oncogene family	64284	7.43836	5.16502e-17	5.74417e-14
ILMN_1784294	7	7q32.2	CPA4	carboxypeptidase A4	51200	7.24403	2.93557e-17	4.04826e-14
ILMN_1656837	3	3q23	RBP1	retinol binding protein 1	5947	7.22488	2.46692e-15	8.85931e-13
ILMN_2320330	2	2q11.1	MAL	mal, T cell differentiation protein	4118	7.18772	1.25458e-17	2.70331e-14
ILMN_1706505	9	9q34.3	COL5A1	collagen type V alpha 1 chain	1289	7.16806	1.12615e-15	5.10856e-13
ILMN_1805132	X	Xq22.1	PCDH19	protocadherin 19	57526	7.07045	2.77816e-17	3.99083e-14
ILMN_1715684	1	1q32.2	LAMB3	laminin subunit beta 3	3914	6.97551	3.08164e-15	1.0287e-12
ILMN_1711888	7	7p12.1	COBL	cordon-bleu WH2 repeat protein	23242	6.92911	8.81853e-16	4.34325e-13
ILMN_1656287	10	10q22.1	SPOCK2	SPARC (osteonectin), cwcv and kazal like domains proteoglycan 2	9806	6.92855	8.35869e-15	2.23391e-12
ILMN_2171384	4	4q13.3	CXCL5	C-X-C motif chemokine ligand 5	6374	6.89895	1.08032e-15	5.0331e-13
ILMN_1671092	8	8q11.23	SOX17	SRY-box transcription factor 17	64321	6.79096	2.73135e-18	8.56055e-15
ILMN_1796461	16	16p11.2	PRSS8	serine protease 8	5652	6.78149	1.26567e-15	5.4252e-13
ILMN_1773337	10	10q21.1	DKK1	dickkopf WNT signaling pathway inhibitor 1	22943	6.6245	3.19708e-15	1.04974e-12
ILMN_3307693	20	20q13.12	WFDC2	WAP four-disulfide core domain 2	10406	6.60442	3.43626e-15	1.10718e-12
ILMN_1712475	16	16p12.2	HS3ST2	heparan sulfate-glucosamine 3-sulfotransferase 2	9956	6.54397	4.37206e-17	5.59274e-14
ILMN_2384745	19	19q13.31	PSG4	pregnancy specific beta-1-glycoprotein 4	5672	6.50414	9.23053e-14	1.4536e-11
ILMN_1663640	X	Xp11.3	MAOA	monoamine oxidase A	4128	6.49052	1.00168e-15	4.7964e-13
ILMN_2228035	4	4p15.33	HS3ST1	heparan sulfate-glucosamine 3-sulfotransferase 1	9957	6.37185	9.6918e-17	9.28151e-14
ILMN_1798496	17	17q21.32	HOXB8	homeobox B8	3218	6.33777	1.56351e-15	6.12539e-13
ILMN_1658483	2	2q14.1	IL1A	interleukin 1 alpha	3552	6.23691	2.72003e-15	9.37969e-13
ILMN_2129572	1	1p21.3	F3	coagulation factor III, tissue factor	2152	6.22895	1.44918e-15	5.90933e-13
ILMN_2375992	15	15q15.1	SPINT1	serine peptidase inhibitor, Kunitz type 1	6692	6.18776	1.63476e-17	2.96632e-14
ILMN_1750373	X	Xp22.31	ANOS1	anosmin 1	3730	6.15897	3.77926e-15	1.17382e-12
ILMN_1785404	4	4p15.32	FGFBP1	fibroblast growth factor binding protein 1	9982	6.05804	3.89094e-13	4.52987e-11
ILMN_2163723	12	12q13.13	KRT7	keratin 7	3855	5.90646	1.09306e-14	2.74595e-12
ILMN_1699887	11	11q24.3	ST14	ST14 transmembrane serine protease matriptase	6768	5.88846	1.10333e-13	1.64668e-11
ILMN_1748840	16	16q22.2	CALB2	calbindin 2	794	5.86368	1.56864e-17	2.96632e-14
ILMN_2350634	2	2p16.1	EFEMP1	EGF containing fibulin extracellular matrix protein 1	2202	5.85197	7.65134e-15	2.1103e-12
ILMN_1728106	6	6p21.33	TNF	tumor necrosis factor	7124	5.85007	2.90002e-16	1.99962e-13
ILMN_1775501	2	2q14.1	IL1B	interleukin 1 beta	3553	5.82517	2.23676e-15	8.21698e-13
ILMN_1703852	13	13q33.3	EFNB2	ephrin B2	1948	5.82059	7.47042e-14	1.23822e-11
ILMN_1791826	1	1q22	RAB25	RAB25, member RAS oncogene family	57111	5.81398	4.88799e-15	1.46538e-12
ILMN_2112638	9	9q31.3	SVEP1	sushi, von Willebrand factor type A, EGF and pentraxin domain containing 1	79987	5.78801	1.05846e-16	9.4497e-14
ILMN_1810420	2	2p13.2	DYSF	dysferlin	8291	5.78015	2.94506e-14	6.00792e-12
ILMN_1685496	1	c("1q43", "1q23.1")	RGS7	regulator of G protein signaling 7	6000	5.77889	8.49366e-16	4.24387e-13
ILMN_1685709	1	1p34.2	TMEM125	transmembrane protein 125	128218	5.70332	1.52192e-15	6.08681e-13
ILMN_1679262	5	5q32	DPYSL3	dihydropyrimidinase like 3	1809	5.67996	1.09638e-16	9.4497e-14
ILMN_1657234	2	2q36.3	CCL20	C-C motif chemokine ligand 20	6364	5.65202	4.21039e-14	7.93209e-12
ILMN_1678143	12	12p12.3	ARHGDIB	Rho GDP dissociation inhibitor beta	397	5.60327	1.37242e-16	1.12656e-13
ILMN_2184373	4	4q13.3	CXCL8	C-X-C motif chemokine ligand 8	3576	5.59118	4.02741e-15	1.23972e-12
ILMN_1682775	6	6p24.1	EDN1	endothelin 1	1906	5.54242	1.3038e-14	3.18794e-12
ILMN_1692261	3	3q22.2	EPHB1	EPH receptor B1	2047	5.50418	2.24039e-15	8.21698e-13
ILMN_1696537	4	4q24	DDIT4L	DNA damage inducible transcript 4 like	115265	5.50281	1.37194e-14	3.30763e-12
ILMN_2125346	19	19p13.2	MUC16	mucin 16, cell surface associated	94025	5.49639	4.83183e-13	5.30516e-11
ILMN_2058782	14	14q32.12	IFI27	interferon alpha inducible protein 27	3429	5.4843	3.52718e-14	6.94876e-12
ILMN_1801616	12	12p13.1	EMP1	epithelial membrane protein 1	2012	5.41874	3.04932e-13	3.74122e-11
ILMN_1800091	3	3q25.32	RARRES1	retinoic acid receptor responder 1	5918	5.34142	5.03283e-14	8.99026e-12
ILMN_1704294	16	16q22.1	CDH3	cadherin 3	1001	5.32989	5.77871e-14	1.00114e-11
ILMN_2321153	3	3q29	MUC4	mucin 4, cell surface associated	4585	5.2843	1.7058e-14	3.82319e-12
ILMN_1716264	10	10q23.31	ANKRD1	ankyrin repeat domain 1	27063	5.27451	1.46749e-12	1.268e-10
ILMN_1730906	3	3q12.1	FILIP1L	filamin A interacting protein 1 like	11259	5.26063	9.36807e-15	2.46545e-12
ILMN_1739690	4	4q13.3	NPFFR2	neuropeptide FF receptor 2	10886	5.23566	4.44232e-14	8.25641e-12
ILMN_1736911	9	9q22.33	TMOD1	tropomodulin 1	7111	5.19434	1.27463e-15	5.4252e-13
ILMN_1770505	22	22q13.2	BIK	BCL2 interacting killer	638	5.17316	1.71593e-16	1.28605e-13
ILMN_1676289	11	11q23.2	NCAM1	neural cell adhesion molecule 1	4684	5.13158	5.03096e-17	5.74417e-14
ILMN_1670490	1	1p36.21	PDPN	podoplanin	10630	5.07909	8.27683e-16	4.19635e-13
ILMN_1733756	6	6q13-q14.1	COL12A1	collagen type XII alpha 1 chain	1303	5.03358	2.66822e-14	5.57513e-12
ILMN_1728478	17	17p13.2	CXCL16	C-X-C motif chemokine ligand 16	58191	5.00613	9.35852e-16	4.54429e-13
ILMN_1698666	11	11q13.1	CST6	cystatin E/M	1474	5.0039	5.54405e-15	1.6198e-12
ILMN_1809364	12	12p13.31	NTF3	neurotrophin 3	4908	4.99141	1.08348e-14	2.74595e-12
ILMN_1708130	11	11p13	EHF	ETS homologous factor	26298	4.9542	9.19983e-15	2.43979e-12
ILMN_2170814	3	3q27.1	LAMP3	lysosomal associated membrane protein 3	27074	4.92454	2.83908e-13	3.51706e-11
ILMN_1788955	10	10q23.33	PDLIM1	PDZ and LIM domain 1	9124	4.91544	1.81817e-15	6.81338e-13
ILMN_1805999	17	17q11.2	MYO1D	myosin ID	4642	4.90553	1.04031e-16	9.4497e-14
ILMN_1657145	17	17q21.31	MEOX1	mesenchyme homeobox 1	4222	4.89417	2.77813e-14	5.76981e-12
ILMN_1680814	1	1p34.2	EDN2	endothelin 2	1907	4.88927	1.76679e-14	3.9298e-12
ILMN_2231928	21	21q22.3	MX2	MX dynamin like GTPase 2	4600	4.88889	3.64101e-14	7.09194e-12
ILMN_1655614	6	6p24.3	DSP	desmoplakin	1832	4.8284	2.72064e-15	9.37969e-13
ILMN_1807169	1	1p35.2	TINAGL1	tubulointerstitial nephritis antigen like 1	64129	4.79761	1.64699e-12	1.38155e-10
ILMN_2176592	3	3q26.1	BCHE	butyrylcholinesterase	590	4.79083	7.56816e-15	2.1103e-12
ILMN_2047511	7	7p22.3	ADAP1	ArfGAP with dual PH domains 1	11033	4.75903	3.00016e-16	2.02811e-13
ILMN_1715603	12	12q13.3	IL23A	interleukin 23 subunit alpha	51561	4.75822	5.88842e-16	3.3703e-13
ILMN_1752932	11	11q23.3	MPZL2	myelin protein zero like 2	10205	4.70819	1.71673e-13	2.36745e-11
ILMN_2346727	8	8p22	MTUS1	microtubule associated scaffold protein 1	57509	4.70276	8.28393e-13	8.13666e-11
ILMN_1708348	10	10q26.3	ADAM8	ADAM metallopeptidase domain 8	101	4.68556	2.68421e-13	3.36512e-11
ILMN_1807372	22	22q11.23	ADORA2A	adenosine A2a receptor	135	4.68281	4.80153e-14	8.72389e-12
ILMN_1784749	13	13q34	GAS6	growth arrest specific 6	2621	4.6771	1.2293e-15	5.36475e-13
ILMN_1793888	18	18q21.33	SERPINB5	serpin family B member 5	5268	4.66825	5.74894e-13	6.06117e-11
ILMN_2054297	1	1q31.1	PTGS2	prostaglandin-endoperoxide synthase 2	5743	4.65852	1.96584e-12	1.59095e-10
ILMN_1785444	1	1q32.1	LEMD1	LEM domain containing 1	93273	4.57808	1.09914e-14	2.74595e-12
ILMN_2068104	7	7q21.3	TFPI2	tissue factor pathway inhibitor 2	7980	4.54178	3.43227e-14	6.91994e-12
ILMN_1803691	1	1p34.1	ARTN	artemin	9048	4.52435	1.41721e-14	3.36964e-12
ILMN_1682599	12	12p13.1	GPRC5A	G protein-coupled receptor class C group 5 member A	9052	4.50682	8.58867e-11	3.5419e-09
ILMN_2405680	19	19p13.3	CRB3	crumbs cell polarity complex component 3	92359	4.50023	9.42486e-14	1.47696e-11
ILMN_1669982	2	2p16.1	CCDC85A	coiled-coil domain containing 85A	114800	4.49269	1.24673e-12	1.11065e-10
ILMN_1695590	5	5q32	ADRB2	adrenoceptor beta 2	154	4.47719	4.61704e-15	1.39629e-12
ILMN_2096784	20	20q13.31	TFAP2C	transcription factor AP-2 gamma	7022	4.46048	7.99013e-15	2.16904e-12
ILMN_1752658	17	17q21.33	NGFR	nerve growth factor receptor	4804	4.45755	1.07707e-14	2.74595e-12
ILMN_1779043	19	19q13.42	CACNG6	calcium voltage-gated channel auxiliary subunit gamma 6	59285	4.4414	3.64987e-12	2.6547e-10
ILMN_1752478	1	1p36.21	DHRS3	dehydrogenase/reductase 3	9249	4.40964	2.92229e-14	5.99697e-12
ILMN_1752935	14	14q23.1	TMEM30B	transmembrane protein 30B	161291	4.36887	1.70559e-15	6.53353e-13
ILMN_3307916	7	7p14.3	BMPER	BMP binding endothelial regulator	168667	4.3569	1.6544e-14	3.77729e-12
ILMN_2415583	X	Xq26.2	HS6ST2	heparan sulfate 6-O-sulfotransferase 2	90161	4.35238	3.50685e-14	6.94841e-12
ILMN_1765641	7	7q21.11	SEMA3A	semaphorin 3A	10371	4.33052	1.02e-13	1.55615e-11
ILMN_3246895	5	5q11.2	ACTBL2	actin beta like 2	345651	4.32471	7.72006e-12	4.91064e-10
ILMN_2259818	3	3q29	MELTF	melanotransferrin	4241	4.30962	2.34652e-12	1.83444e-10
ILMN_1701195	6	6p12.3	PLA2G7	phospholipase A2 group VII	7941	4.30585	1.32064e-12	1.16318e-10
ILMN_1724832	20	20p11.23	OVOL2	ovo like zinc finger 2	58495	4.28425	2.68128e-15	9.37969e-13
ILMN_1758128	17	17q25.1	CYGB	cytoglobin	114757	4.21758	4.99314e-14	8.96582e-12
ILMN_1721770	9	9q33.1	PAPPA	pappalysin 1	5069	4.19513	2.98808e-12	2.24928e-10
ILMN_1714445	1	1p34.1	SLC6A9	solute carrier family 6 member 9	6536	4.15499	5.18009e-11	2.34902e-09
ILMN_1790689	16	16q24.1	CRISPLD2	cysteine rich secretory protein LCCL domain containing 2	83716	4.15184	1.13219e-13	1.67795e-11
ILMN_2199389	3	3p22.1	VIPR1	vasoactive intestinal peptide receptor 1	7433	4.13325	1.28051e-14	3.15334e-12
ILMN_1717334	19	19p13.3	VAV1	vav guanine nucleotide exchange factor 1	7409	4.13034	1.23251e-11	7.1973e-10
ILMN_3204975	3	3q25.1	AADACP1	arylacetamide deacetylase pseudogene 1	201651	4.1247	9.09896e-14	1.4536e-11
ILMN_1770940	16	16q22.1	CDH1	cadherin 1	999	4.11872	7.88567e-13	7.78987e-11
ILMN_1758719	6	6p24.2	NEDD9	neural precursor cell expressed, developmentally down-regulated 9	4739	4.11837	6.29109e-12	4.13503e-10
ILMN_1766261	6	6q23.2	SLC2A12	solute carrier family 2 member 12	154091	4.11755	1.55345e-11	8.68019e-10
ILMN_1775829	6	6q23.3	PERP	p53 apoptosis effector related to PMP22	64065	4.1026	1.18762e-11	6.99907e-10
ILMN_1680874	6	6p25.2	TUBB2B	tubulin beta 2B class IIb	347733	4.09955	1.33268e-12	1.16318e-10
ILMN_2077905	1	1p13.1	PTGFRN	prostaglandin F2 receptor inhibitor	5738	4.0925	6.64403e-15	1.89305e-12
ILMN_1760414	3	3q25.1	AADAC	arylacetamide deacetylase	13	4.06873	5.83851e-12	3.88588e-10
ILMN_1778575	3	3p25.1	WNT7A	Wnt family member 7A	7476	4.05097	8.56803e-13	8.27427e-11
ILMN_1710644	16	16q22.2	MARVELD3	MARVEL domain containing 3	91862	4.04019	3.61705e-12	2.64198e-10
ILMN_1706015	3	3q29	FAM43A	family with sequence similarity 43 member A	131583	4.02083	7.1269e-13	7.17843e-11
ILMN_1660973	2	2q31.1	GAD1	glutamate decarboxylase 1	2571	3.99403	9.5784e-13	8.94919e-11
ILMN_1732197	22	22q12.1	MN1	MN1 proto-oncogene, transcriptional regulator	4330	3.98924	7.94319e-13	7.82426e-11
ILMN_1759910	14	14q32.13	SERPINA5	serpin family A member 5	5104	3.98851	5.89056e-13	6.19156e-11
ILMN_2089167	11	11q13.2	RHOD	ras homolog family member D	29984	3.96095	6.07768e-12	4.00639e-10
ILMN_1730223	6	6p22.1	RNF39	ring finger protein 39	80352	3.95687	3.53481e-13	4.2462e-11
ILMN_1790338	9	9q34.11	PRRX2	paired related homeobox 2	51450	3.94529	5.54814e-13	5.90363e-11
ILMN_2413158	7	7q32.3	PODXL	podocalyxin like	5420	3.91463	2.26499e-13	2.94671e-11
ILMN_1744381	7	7q22.1	SERPINE1	serpin family E member 1	5054	3.91341	1.0593e-11	6.34036e-10
ILMN_1738552	5	5p13.2	SLC1A3	solute carrier family 1 member 3	6507	3.85525	1.7932e-12	1.48276e-10
ILMN_3249032	2	2p21	EPCAM	epithelial cell adhesion molecule	4072	3.84511	1.00774e-13	1.55615e-11
ILMN_1758066	21	21q22.13	DSCR8	Down syndrome critical region 8	84677	3.84407	3.46662e-13	4.19352e-11
ILMN_1656057	10	10q22.2	PLAU	plasminogen activator, urokinase	5328	3.84299	1.21224e-14	3.0067e-12
ILMN_1708041	19	19q12	PLEKHF1	pleckstrin homology and FYVE domain containing 1	79156	3.8378	1.32618e-12	1.16318e-10
ILMN_2353161	16	16p13.3	MSLN	mesothelin	10232	3.8265	2.41597e-13	3.10795e-11
ILMN_1810836	4	4q26	PDE5A	phosphodiesterase 5A	8654	3.82514	1.74712e-13	2.39022e-11
ILMN_1741143	4	4p12	TXK	TXK tyrosine kinase	7294	3.81057	8.3394e-13	8.16788e-11
ILMN_1781791	X	Xp21.1	PRRG1	proline rich and Gla domain 1	5638	3.79687	6.12972e-14	1.04618e-11
ILMN_1655766	5	5q14.1	ANKRD34B	ankyrin repeat domain 34B	340120	3.79258	6.26216e-10	1.8374e-08
ILMN_1775822	22	22q13.1	PDGFB	platelet derived growth factor subunit B	5155	3.78224	5.879e-14	1.01342e-11
ILMN_1772466	19	19p13.3	SH2D3A	SH2 domain containing 3A	10045	3.77087	1.49249e-12	1.28638e-10
ILMN_1759787	20	20p11.21	THBD	thrombomodulin	7056	3.76337	8.26817e-12	5.1805e-10
ILMN_1701170	11	11q24.3	BARX2	BARX homeobox 2	8538	3.75283	7.86736e-12	4.98594e-10
ILMN_2100287	10	10q25.1	CFAP58	cilia and flagella associated protein 58	159686	3.74859	1.88556e-14	4.16708e-12
ILMN_1696615	8	8q12.1	CA8	carbonic anhydrase 8	767	3.74413	6.18562e-14	1.05052e-11
ILMN_1706483	1	1q32.1	C1orf116	chromosome 1 open reading frame 116	79098	3.74406	5.26266e-13	5.66986e-11
ILMN_2216815	6	6q23.3	MAP7	microtubule associated protein 7	9053	3.74266	3.51677e-13	4.2393e-11
ILMN_1665738	11	11q24.3	FLI1	Fli-1 proto-oncogene, ETS transcription factor	2313	3.73928	5.66846e-12	3.80446e-10
ILMN_1802780	12	12p13.31	CD163L1	CD163 molecule like 1	283316	3.70407	1.29166e-13	1.87613e-11
ILMN_1722809	7	7q31.1	NRCAM	neuronal cell adhesion molecule	4897	3.70263	1.8364e-12	1.50742e-10
ILMN_1656369	8	8p11.21	TCIM	transcriptional and immune response regulator	56892	3.68317	4.41307e-11	2.0588e-09
ILMN_1700728	2	2p23.3	KRTCAP3	keratinocyte associated protein 3	200634	3.67832	2.5141e-12	1.94877e-10
ILMN_1711203	6	6p21.33	C6orf15	chromosome 6 open reading frame 15	29113	3.67665	3.77496e-13	4.44183e-11
ILMN_1664691	4	4q23	DAPP1	dual adaptor of phosphotyrosine and 3-phosphoinositides 1	27071	3.6454	3.84271e-12	2.78322e-10
ILMN_1702501	6	6q27	RPS6KA2	ribosomal protein S6 kinase A2	6196	3.63762	3.40307e-13	4.13114e-11
ILMN_2401873	1	1q41	DUSP10	dual specificity phosphatase 10	11221	3.62801	4.68755e-12	3.28321e-10
ILMN_1732410	10	10q21.2	SLC16A9	solute carrier family 16 member 9	220963	3.62094	8.0944e-12	5.09238e-10
ILMN_1788874	14	14q32.13	SERPINA3	serpin family A member 3	12	3.61914	1.58182e-12	1.34654e-10
ILMN_1698706	14	14q22.1	NID2	nidogen 2	22795	3.61112	4.59092e-12	3.24337e-10
ILMN_2071641	1	1q42.2	KCNK1	potassium two pore domain channel subfamily K member 1	3775	3.58677	2.55727e-13	3.24133e-11
ILMN_1730201	18	18q12.1	DTNA	dystrobrevin alpha	1837	3.58563	9.07511e-12	5.60705e-10
ILMN_1757099	10	10q25.3	PLEKHS1	pleckstrin homology domain containing S1	79949	3.568	4.69493e-12	3.28321e-10
ILMN_1812926	4	4q21.21	ANTXR2	ANTXR cell adhesion molecule 2	118429	3.55055	9.93334e-12	6.02926e-10
ILMN_2188862	19	19p13.11	GDF15	growth differentiation factor 15	9518	3.55046	1.08319e-12	9.87938e-11
ILMN_1760990	15	15q25.2	SH3GL3	SH3 domain containing GRB2 like 3, endophilin A3	6457	3.54146	1.67066e-13	2.32248e-11
ILMN_1776724	2	2q23.2	LYPD6	LY6/PLAUR domain containing 6	130574	3.51681	3.54313e-12	2.60029e-10
ILMN_1735156	20	20p13	SLC4A11	solute carrier family 4 member 11	83959	3.51577	1.51202e-11	8.50384e-10
ILMN_1720373	16	16q24.2	SLC7A5	solute carrier family 7 member 5	8140	3.51532	1.3317e-12	1.16318e-10
ILMN_1690223	7	7q35-q36.1	CNTNAP2	contactin associated protein 2	26047	3.51453	1.2127e-12	1.09162e-10
ILMN_1664265	7	7q34-q35	EPHA1	EPH receptor A1	2041	3.50084	9.05658e-13	8.6015e-11
ILMN_2396875	7	7p12.3	IGFBP3	insulin like growth factor binding protein 3	3486	3.48452	7.69748e-13	7.6699e-11
ILMN_1702738	19	19q13.32	KLC3	kinesin light chain 3	147700	3.47811	7.07294e-11	3.04048e-09
ILMN_1766650	14	14q21.1	FOXA1	forkhead box A1	3169	3.4684	1.83602e-10	6.53824e-09
ILMN_2404154	14	14q32.13	SERPINA1	serpin family A member 1	5265	3.46007	9.00193e-13	8.57322e-11
ILMN_1738849	2	2q12.1	SLC9A2	solute carrier family 9 member A2	6549	3.45465	9.21547e-10	2.55601e-08
ILMN_2226917	14	14q24.1	SUSD6	sushi domain containing 6	9766	3.43884	1.64587e-12	1.38155e-10
ILMN_1707124	2	2q32.1	TFPI	tissue factor pathway inhibitor	7035	3.42417	5.53987e-12	3.73763e-10
ILMN_1706960	10	10p12.2-p12.1	KIAA1217	KIAA1217	56243	3.42388	7.22655e-14	1.20359e-11
ILMN_2241124	6	c("6p12.3", "6")	ADGRF1	adhesion G protein-coupled receptor F1	266977	3.42255	7.07434e-13	7.17339e-11
ILMN_2186983	10	10q11.22	ANXA8L1	annexin A8 like 1	728113	3.42135	2.54566e-14	5.35148e-12
ILMN_1752665	16	16q22.1	ELMO3	engulfment and cell motility 3	79767	3.41876	2.09981e-13	2.7631e-11
ILMN_1698766	16	16p11.2	PYCARD	PYD and CARD domain containing	29108	3.41389	1.53868e-11	8.61161e-10
ILMN_1740426	17	17p11.2	RASD1	ras related dexamethasone induced 1	51655	3.40407	4.80781e-14	8.72389e-12
ILMN_1767556	10	10q11.21	DEPP1	DEPP1 autophagy regulator	11067	3.39727	9.4337e-09	1.80286e-07
ILMN_2041190	5	5q13.3	F2RL1	F2R like trypsin receptor 1	2150	3.38745	5.67167e-13	5.99806e-11
ILMN_1759513	2	2q23.3	RND3	Rho family GTPase 3	390	3.36602	2.30622e-12	1.81114e-10
ILMN_1773413	13	13q32.3	DOCK9	dedicator of cytokinesis 9	23348	3.35505	3.16995e-11	1.59079e-09
ILMN_1658426	2	2q35	WNT10A	Wnt family member 10A	80326	3.33804	9.62799e-13	8.97121e-11
ILMN_1801697	19	19q13.12	SYNE4	spectrin repeat containing nuclear envelope family member 4	163183	3.33631	7.50773e-12	4.79327e-10
ILMN_1793476	11	11p15.4	CAVIN3	caveolae associated protein 3	112464	3.33103	7.7917e-13	7.74141e-11
ILMN_2082585	8	8q11.21	SNAI2	snail family transcriptional repressor 2	6591	3.33036	1.52513e-10	5.63032e-09
ILMN_1689976	5	5q14.3	EDIL3	EGF like repeats and discoidin domains 3	10085	3.32215	4.42121e-10	1.36094e-08
ILMN_1792748	2	2q34	CPS1	carbamoyl-phosphate synthase 1	1373	3.32196	4.83722e-12	3.36905e-10
ILMN_1774982	19	19q13.42	CDC42EP5	CDC42 effector protein 5	148170	3.31618	5.3816e-12	3.64511e-10
ILMN_1685699	9	9p13.3	PRSS3	serine protease 3	5646	3.31617	1.26842e-12	1.12416e-10
ILMN_1661861	5	5q31.1	CSF2	colony stimulating factor 2	1437	3.31246	5.54359e-13	5.90363e-11
ILMN_1767446	4	4q31.21	RNF150	ring finger protein 150	57484	3.29509	1.06898e-13	1.61089e-11
ILMN_1656934	X	Xp22.2	REPS2	RALBP1 associated Eps domain containing 2	9185	3.29133	1.62995e-12	1.37394e-10
ILMN_1731353	2	2q35	CHPF	chondroitin polymerizing factor	79586	3.26093	8.60769e-11	3.54251e-09
ILMN_1684108	5	5p15.33	IRX4	iroquois homeobox 4	50805	3.2604	5.99786e-12	3.96135e-10
ILMN_1812759	14	14q22.2	GCH1	GTP cyclohydrolase 1	2643	3.26007	3.34374e-11	1.66341e-09
ILMN_2374340	19	19q13.31	PLAUR	plasminogen activator, urokinase receptor	5329	3.22842	5.23434e-11	2.35894e-09
ILMN_1812226	19	19p13.2	ICAM1	intercellular adhesion molecule 1	3383	3.22655	5.02904e-11	2.29948e-09
ILMN_3238960	7	7q34	PRSS3P2	PRSS3 pseudogene 2	154754	3.22496	3.6918e-13	4.38563e-11
ILMN_1788109	16	16q24.2	IL17C	interleukin 17C	27189	3.20882	2.54898e-10	8.6751e-09
ILMN_1766925	16	16q23.3	CDH13	cadherin 13	1012	3.20595	6.75992e-10	1.9568e-08
ILMN_1675857	X	Xq22.3	COL4A6	collagen type IV alpha 6 chain	1288	3.19906	5.76894e-11	2.54335e-09
ILMN_1812618	5	5q31.3	ARAP3	ArfGAP with RhoGAP domain, ankyrin repeat and PH domain 3	64411	3.19362	3.54489e-12	2.60029e-10
ILMN_1684554	1	1p35.2	COL16A1	collagen type XVI alpha 1 chain	1307	3.1907	2.11299e-09	5.14822e-08
ILMN_2317581	22	22q13.33	SHANK3	SH3 and multiple ankyrin repeat domains 3	85358	3.18205	1.18102e-12	1.06869e-10
ILMN_1770653	8	8q24.12	MAL2	mal, T cell differentiation protein 2	114569	3.17878	1.80864e-12	1.48818e-10
ILMN_1656940	5	5q32	ABLIM3	actin binding LIM protein family member 3	22885	3.16753	3.46037e-12	2.55625e-10
ILMN_1668194	19	19q13.33	LMTK3	lemur tyrosine kinase 3	114783	3.16123	1.26176e-09	3.33337e-08
ILMN_2328378	7	7p15.3	OSBPL3	oxysterol binding protein like 3	26031	3.15735	9.88899e-12	6.01292e-10
ILMN_1791726	16	16q24.3	TUBB3	tubulin beta 3 class III	10381	3.15622	3.99122e-12	2.88472e-10
ILMN_1704154	13	13q12.12	TNFRSF19	TNF receptor superfamily member 19	55504	3.15387	9.33003e-13	8.81266e-11
ILMN_1741214	12	12q13.3	NXPH4	neurexophilin 4	11247	3.15016	3.59636e-10	1.15017e-08
ILMN_1680996	10	10q11.21	ALOX5	arachidonate 5-lipoxygenase	240	3.14382	1.84109e-11	9.99583e-10
ILMN_1744949	5	5q15	RHOBTB3	Rho related BTB domain containing 3	22836	3.14284	3.01382e-07	3.44283e-06
ILMN_1651429	22	22q12.2	SELENOM	selenoprotein M	140606	3.11563	1.87444e-11	1.01449e-09
ILMN_1676192	17	17p13.1	SLC13A5	solute carrier family 13 member 5	284111	3.10967	1.66653e-13	2.32248e-11
ILMN_2059452	5	5q23.3	SLC12A2	solute carrier family 12 member 2	6558	3.10803	3.25133e-11	1.62689e-09
ILMN_2171295	7	7q21.13	CDK14	cyclin dependent kinase 14	5218	3.10657	1.37497e-09	3.58573e-08
ILMN_1668134	1	1p13.3	GSTM1	glutathione S-transferase mu 1	2944	3.10397	5.76812e-12	3.85391e-10
ILMN_1711030	8	8q24.3	OPLAH	5-oxoprolinase, ATP-hydrolysing	26873	3.09811	5.36773e-12	3.64287e-10
ILMN_2055330	1	1q44	KIF26B	kinesin family member 26B	55083	3.08224	2.24941e-10	7.8334e-09
ILMN_1734773	7	7q34	PRSS1	serine protease 1	5644	3.07063	1.90487e-12	1.54888e-10
ILMN_2041483	5	5q31.3	PCDHB10	protocadherin beta 10	56126	3.06873	3.43527e-11	1.69677e-09
ILMN_1671600	19	19q13.42	EPS8L1	EPS8 like 1	54869	3.06692	1.62681e-11	9.03157e-10
ILMN_1767362	5	5q12.3	ADAMTS6	ADAM metallopeptidase with thrombospondin type 1 motif 6	11174	3.05518	1.72976e-10	6.21202e-09
ILMN_2376723	9	9p21.3	CDKN2B	cyclin dependent kinase inhibitor 2B	1030	3.05183	6.01917e-11	2.63681e-09
ILMN_1740923	20	20p13	SLC52A3	solute carrier family 52 member 3	113278	3.04883	5.33375e-11	2.39524e-09
ILMN_1670807	8	8q24.21	LRATD2	LRAT domain containing 2	157638	3.04527	1.36679e-12	1.18694e-10
ILMN_1750234	7	7q34	PRSS2	serine protease 2	5645	3.04301	9.82134e-13	9.1267e-11
ILMN_1765578	3	3q25.31	TIPARP	TCDD inducible poly(ADP-ribose) polymerase	25976	3.03534	2.06252e-11	1.10073e-09
ILMN_2052208	1	1p31.3	GADD45A	growth arrest and DNA damage inducible alpha	1647	3.03073	4.03376e-11	1.90765e-09
ILMN_2137789	9	9q31.2	KLF4	Kruppel like factor 4	9314	3.02941	7.48048e-11	3.1918e-09
ILMN_1718046	15	15q25.1	ARNT2	aryl hydrocarbon receptor nuclear translocator 2	9915	3.02175	6.75074e-12	4.37479e-10
ILMN_1701424	1	1q25.3	LAMC2	laminin subunit gamma 2	3918	3.00537	1.2196e-11	7.16304e-10
ILMN_1673522	18	18q12.2	MOCOS	molybdenum cofactor sulfurase	55034	3.00327	1.568e-12	1.3414e-10
ILMN_1732799	1	1q32.2	CD34	CD34 molecule	947	2.99553	6.09961e-13	6.37243e-11
ILMN_1706660	1	1p34.2	HYI	hydroxypyruvate isomerase (putative)	81888	2.98007	6.96984e-13	7.10924e-11
ILMN_1749792	10	10q24.1	SORBS1	sorbin and SH3 domain containing 1	10580	2.97967	1.914e-11	1.03265e-09
ILMN_1791280	12	12q24.23	HSPB8	heat shock protein family B (small) member 8	26353	2.95782	9.15339e-12	5.6453e-10
ILMN_1704353	1	1p13.1	IGSF3	immunoglobulin superfamily member 3	3321	2.95533	6.63538e-12	4.31625e-10
ILMN_1734276	20	20q13.31	PMEPA1	prostate transmembrane protein, androgen induced 1	56937	2.95196	1.30437e-11	7.53258e-10
ILMN_2143566	18	18q12.2	SLC39A6	solute carrier family 39 member 6	25800	2.94319	5.6176e-11	2.49578e-09
ILMN_1753457	11	11p15.5	PKP3	plakophilin 3	11187	2.94153	2.57158e-10	8.73997e-09
ILMN_2232463	3	3q25.33	ARL14	ADP ribosylation factor like GTPase 14	80117	2.9374	4.05826e-13	4.64826e-11
ILMN_1694810	22	22q13.33	PANX2	pannexin 2	56666	2.93612	2.90653e-13	3.57877e-11
ILMN_3236367	1	1p36.13	IFFO2	intermediate filament family orphan 2	126917	2.93399	1.32443e-12	1.16318e-10
ILMN_1715401	16	16q13	MT1G	metallothionein 1G	4495	2.91574	7.90845e-10	2.2452e-08
ILMN_1694325	19	19p13.13	NFIX	nuclear factor I X	4784	2.91482	1.22527e-12	1.10006e-10
ILMN_1718866	5	5q32	C5orf46	chromosome 5 open reading frame 46	389336	2.90619	6.72327e-08	9.50355e-07
ILMN_1782129	22	22q13.33	ZBED4	zinc finger BED-type containing 4	9889	2.90364	4.65316e-12	3.27393e-10
ILMN_1681886	21	21q21.3	ADAMTS5	ADAM metallopeptidase with thrombospondin type 1 motif 5	11096	2.90159	2.85556e-09	6.63359e-08
ILMN_2058468	6	6q15	BACH2	BTB domain and CNC homolog 2	60468	2.90034	1.38649e-12	1.20102e-10
ILMN_1808777	19	19q13.33	EHD2	EH domain containing 2	30846	2.89218	1.63283e-11	9.03585e-10
ILMN_1777170	1	1p34.2	FAM183A	family with sequence similarity 183 member A	440585	2.89125	1.12404e-10	4.4137e-09
ILMN_3236169	7	7p21.1	MACC1	MET transcriptional regulator MACC1	346389	2.8897	4.61447e-13	5.13189e-11
ILMN_1773959	1	1p31.1	ST6GALNAC5	ST6 N-acetylgalactosaminide alpha-2,6-sialyltransferase 5	81849	2.88609	7.77141e-11	3.2794e-09
ILMN_1676322	1	1p36.11	KDF1	keratinocyte differentiation factor 1	126695	2.88521	3.55394e-12	2.60139e-10
ILMN_1662962	8	8q24.12	COLEC10	collectin subfamily member 10	10584	2.88419	4.02712e-12	2.90458e-10
ILMN_1673769	20	20q13.13	KCNG1	potassium voltage-gated channel modifier subfamily G member 1	3755	2.88158	3.25772e-12	2.43564e-10
ILMN_1713829	9	9q34.11	PTGES	prostaglandin E synthase	9536	2.87202	9.29137e-12	5.72016e-10
ILMN_1725946	1	1q32.2	IRF6	interferon regulatory factor 6	3664	2.86993	1.87768e-10	6.65312e-09
ILMN_1655915	22	22q11.23	MMP11	matrix metallopeptidase 11	4320	2.86707	1.54943e-09	3.95691e-08
ILMN_1739576	11	11p15.4	CYB5R2	cytochrome b5 reductase 2	51700	2.86696	5.4838e-11	2.45132e-09
ILMN_1807981	11	11p15.5	SIGIRR	single Ig and TIR domain containing	59307	2.86624	3.64719e-10	1.16319e-08
ILMN_1764873	19	19p13.2	ELAVL1	ELAV like RNA binding protein 1	1994	2.86065	3.28666e-11	1.63981e-09
ILMN_3239748	12	12q13.13	KRT83	keratin 83	3889	2.85682	2.52497e-13	3.2241e-11
ILMN_1813753	7	7q33	PTN	pleiotrophin	5764	2.85319	8.08256e-11	3.38584e-09
ILMN_1721978	7	7p22.2	CARD11	caspase recruitment domain family member 11	84433	2.85169	9.02513e-09	1.7373e-07
ILMN_1743205	19	19p13.3	ABCA7	ATP binding cassette subfamily A member 7	10347	2.85069	2.00135e-09	4.92233e-08
ILMN_1786034	16	16p12.3	GPRC5B	G protein-coupled receptor class C group 5 member B	51704	2.84103	1.76035e-12	1.46949e-10
ILMN_3241441	1	1p36.32	MEGF6	multiple EGF like domains 6	1953	2.83536	2.99392e-10	9.89629e-09
ILMN_1745242	3	3q24	PLSCR1	phospholipid scramblase 1	5359	2.83325	4.82653e-09	1.0297e-07
ILMN_1761858	X	Xp22.2	MID1	midline 1	4281	2.83223	1.30361e-10	4.97709e-09
ILMN_1659936	19	19q13.33	PPP1R15A	protein phosphatase 1 regulatory subunit 15A	23645	2.82949	1.66691e-10	6.03028e-09
ILMN_1775542	1	1q32.1	FCMR	Fc fragment of IgM receptor	9214	2.82639	2.35623e-11	1.2234e-09
ILMN_2150654	19	19p13.13-p13.12	ZSWIM4	zinc finger SWIM-type containing 4	65249	2.81984	3.2716e-12	2.4361e-10
ILMN_1668924	14	14q32.2	BEGAIN	brain enriched guanylate kinase associated	57596	2.80783	1.83617e-09	4.57397e-08
ILMN_1769388	13	13q12.11	GJB2	gap junction protein beta 2	2706	2.80516	1.44844e-10	5.41022e-09
ILMN_1787923	11	11p15.5	PNPLA2	patatin like phospholipase domain containing 2	57104	2.80451	1.68329e-09	4.22981e-08
ILMN_1717519	20	20q13.12	JPH2	junctophilin 2	57158	2.80139	9.33002e-09	1.788e-07
ILMN_2367707	19	19p13.12	PKN1	protein kinase N1	5585	2.78298	7.1281e-13	7.17843e-11
ILMN_1743933	19	19q12	TSHZ3	teashirt zinc finger homeobox 3	57616	2.77796	3.63516e-12	2.6496e-10
ILMN_1743373	6	6q27	DLL1	delta like canonical Notch ligand 1	28514	2.76731	8.83341e-10	2.47512e-08
ILMN_1658494	13	13q14.11	RGCC	regulator of cell cycle	28984	2.76496	4.39607e-12	3.12492e-10
ILMN_2363498	19	19q13.12	LSR	lipolysis stimulated lipoprotein receptor	51599	2.76326	3.27804e-09	7.44491e-08
ILMN_1660544	15	15q26.2	ARRDC4	arrestin domain containing 4	91947	2.74871	4.88637e-11	2.24261e-09
ILMN_1666594	16	16q24.1	IRF8	interferon regulatory factor 8	3394	2.74328	5.75941e-11	2.54335e-09
ILMN_2349393	11	11p11.2	MDK	midkine	4192	2.74244	7.82875e-13	7.75587e-11
ILMN_1737965	6	6q14.1	ELOVL4	ELOVL fatty acid elongase 4	6785	2.73264	2.98242e-11	1.51432e-09
ILMN_1756501	3	3q27.3	ST6GAL1	ST6 beta-galactoside alpha-2,6-sialyltransferase 1	6480	2.72827	1.36073e-12	1.18466e-10
ILMN_1679051	12	12q15	PTPRR	protein tyrosine phosphatase receptor type R	5801	2.71656	3.38172e-11	1.67753e-09
ILMN_2358134	10	10q22.1	ADAMTS14	ADAM metallopeptidase with thrombospondin type 1 motif 14	140766	2.70445	1.98596e-09	4.89755e-08
ILMN_2153495	22	22q13.31	WNT7B	Wnt family member 7B	7477	2.69796	1.98048e-07	2.39323e-06
ILMN_2218780	8	8q22.1	PDP1	pyruvate dehyrogenase phosphatase catalytic subunit 1	54704	2.69522	4.72202e-09	1.00928e-07
ILMN_1659610	19	19p13.3	TJP3	tight junction protein 3	27134	2.69037	7.45813e-12	4.77044e-10
ILMN_2319952	12	12q13.11	VDR	vitamin D receptor	7421	2.68933	6.72786e-11	2.91029e-09
ILMN_1753139	16	16p13.3	ZG16B	zymogen granule protein 16B	124220	2.68072	4.15651e-08	6.35726e-07
ILMN_1667460	20	20q13.12	SULF2	sulfatase 2	55959	2.6774	4.89165e-11	2.24261e-09
ILMN_1792710	19	19p13.3	DAPK3	death associated protein kinase 3	1613	2.67431	8.73727e-11	3.58653e-09
ILMN_1716815	19	19q13.2	CEACAM1	CEA cell adhesion molecule 1	634	2.67298	3.42455e-10	1.10135e-08
ILMN_1751276	11	11p14.1	BDNF	brain derived neurotrophic factor	627	2.67231	1.50845e-10	5.59798e-09
ILMN_1667225	7	7p14.3	PDE1C	phosphodiesterase 1C	5137	2.66999	3.86628e-11	1.84107e-09
ILMN_1717052	11	11q13.4	STARD10	StAR related lipid transfer domain containing 10	10809	2.66842	1.09275e-12	9.94025e-11
ILMN_1701361	9	9p23	LURAP1L	leucine rich adaptor protein 1 like	286343	2.66798	2.13748e-12	1.70444e-10
ILMN_1805395	11	11q13.1	LTBP3	latent transforming growth factor beta binding protein 3	4054	2.66648	8.94029e-09	1.72386e-07
ILMN_1721559	5	5q33.3	FABP6	fatty acid binding protein 6	2172	2.66628	3.49443e-11	1.71615e-09
ILMN_1675656	11	11p15.4	PPFIBP2	PPFIA binding protein 2	8495	2.66578	1.05406e-12	9.71649e-11
ILMN_1789502	X	Xq26.2	GPC4	glypican 4	2239	2.66114	1.81617e-11	9.90732e-10
ILMN_1712913	5	5q35.2	UNC5A	unc-5 netrin receptor A	90249	2.65936	9.30895e-12	5.72078e-10
ILMN_1730019	22	22q13.33	BRD1	bromodomain containing 1	23774	2.65907	1.14599e-09	3.09037e-08
ILMN_1708508	17	17q22	PPM1E	protein phosphatase, Mg2+/Mn2+ dependent 1E	22843	2.65736	8.79569e-09	1.69882e-07
ILMN_1769891	20	20q13.33	CDH4	cadherin 4	1002	2.65615	8.23428e-11	3.42443e-09
ILMN_1737514	2	2q22.2	KYNU	kynureninase	8942	2.64116	4.53526e-09	9.75679e-08
ILMN_1699651	7	7p15.3	IL6	interleukin 6	3569	2.63911	2.01691e-12	1.62465e-10
ILMN_1691790	6	6q27	DACT2	dishevelled binding antagonist of beta catenin 2	168002	2.62737	4.62217e-11	2.13898e-09
ILMN_1654013	17	17q25.1	HID1	HID1 domain containing	283987	2.62329	7.59677e-11	3.22942e-09
ILMN_1659913	15	15q26.1	ISG20	interferon stimulated exonuclease gene 20	3669	2.62195	8.40786e-12	5.25126e-10
ILMN_1786843	16	16p11.2	KCTD13	potassium channel tetramerization domain containing 13	253980	2.62178	1.3688e-11	7.83902e-10
ILMN_1692056	17	17p12	HS3ST3A1	heparan sulfate-glucosamine 3-sulfotransferase 3A1	9955	2.61644	1.36973e-10	5.15533e-09
ILMN_2214910	7	7q22.1	EPHB4	EPH receptor B4	2050	2.61366	4.61755e-11	2.13898e-09
ILMN_1786353	4	4p12	CNGA1	cyclic nucleotide gated channel subunit alpha 1	1259	2.60916	3.96956e-10	1.24947e-08
ILMN_1657347	3	3q21.3	PODXL2	podocalyxin like 2	50512	2.60857	9.24928e-10	2.56333e-08
ILMN_1808011	1	1p36.11	TENT5B	terminal nucleotidyltransferase 5B	115572	2.60366	1.23164e-11	7.1973e-10
ILMN_1803217	10	10q11.22	GPRIN2	G protein regulated inducer of neurite outgrowth 2	9721	2.59853	1.45293e-09	3.76627e-08
ILMN_1873621	17	17p13.1	NTN1	netrin 1	9423	2.59455	1.3442e-10	5.08699e-09
ILMN_1810191	19	19q13.33	PLA2G4C	phospholipase A2 group IVC	8605	2.58911	3.59734e-08	5.64708e-07
ILMN_2337058	X	Xp11.23	PORCN	porcupine O-acyltransferase	64840	2.58577	4.60136e-08	6.90926e-07
ILMN_1693483	5	5q35.1	FGF18	fibroblast growth factor 18	8817	2.5816	1.37686e-08	2.50414e-07
ILMN_1738401	6	6p25.3	FOXC1	forkhead box C1	2296	2.58131	1.94052e-06	1.72382e-05
ILMN_1769550	17	17q12	SLFN5	schlafen family member 5	162394	2.57535	4.64353e-11	2.14598e-09
ILMN_1674034	5	5q31.1	MACROH2A1	macroH2A.1 histone	9555	2.57426	4.16732e-11	1.96006e-09
ILMN_1721626	10	10q21.2	ARID5B	AT-rich interaction domain 5B	84159	2.57123	8.74893e-13	8.37358e-11
ILMN_1801491	5	5q32	SLC26A2	solute carrier family 26 member 2	1836	2.56843	4.58672e-10	1.40312e-08
ILMN_1723706	22	22q13.31	GRAMD4	GRAM domain containing 4	23151	2.56685	1.59084e-09	4.03576e-08
ILMN_1836309	13	13q34	MCF2L-AS1	MCF2L antisense RNA 1	100289410	2.56626	1.74233e-11	9.54984e-10
ILMN_1691747	8	8q24.23	KHDRBS3	KH RNA binding domain containing, signal transduction associated 3	10656	2.55974	2.65771e-10	8.97426e-09
ILMN_2165753	6	6p22.1	HLA-A	major histocompatibility complex, class I, A	3105	2.55796	2.8444e-10	9.51149e-09
ILMN_1682717	6	6p21.33	IER3	immediate early response 3	8870	2.55633	8.7593e-11	3.58653e-09
ILMN_2150175	8	8q22.1	GDF6	growth differentiation factor 6	392255	2.55122	2.18889e-09	5.29946e-08
ILMN_1711838	1	1p13.3	SLC25A24	solute carrier family 25 member 24	29957	2.54688	3.61124e-11	1.75354e-09
ILMN_1740487	3	3p22.3	CMTM7	CKLF like MARVEL transmembrane domain containing 7	112616	2.54389	7.22135e-12	4.63131e-10
ILMN_1688205	19	19q13.41	KLK10	kallikrein related peptidase 10	5655	2.54217	2.96052e-11	1.50707e-09
ILMN_1655930	5	5q15	ELL2	elongation factor for RNA polymerase II 2	22936	2.54046	2.72464e-10	9.17332e-09
ILMN_1813704	15	15q25.1	CEMIP	cell migration inducing hyaluronidase 1	57214	2.54018	6.14326e-11	2.68095e-09
ILMN_2111932	1	1p35.2	SERINC2	serine incorporator 2	347735	2.53908	9.57479e-11	3.85181e-09
ILMN_2376108	6	6p21.32	PSMB9	proteasome 20S subunit beta 9	5698	2.53694	2.02403e-11	1.08187e-09
ILMN_1695959	21	21q22.11	EVA1C	eva-1 homolog C	59271	2.53059	4.49545e-10	1.37887e-08
ILMN_2115218	13	13q34	ANKRD10	ankyrin repeat domain 10	55608	2.53058	2.52665e-10	8.61611e-09
ILMN_1653466	1	1p36.33	HES4	hes family bHLH transcription factor 4	57801	2.52573	2.36098e-09	5.66437e-08
ILMN_1684755	10	10q24.31	KAZALD1	Kazal type serine peptidase inhibitor domain 1	81621	2.52547	7.02032e-11	3.02541e-09
ILMN_2049766	7	7p15.2	NFE2L3	nuclear factor, erythroid 2 like 3	9603	2.52113	9.56929e-13	8.94919e-11
ILMN_2173611	16	16q13	MT1E	metallothionein 1E	4493	2.51896	1.33303e-08	2.44325e-07
ILMN_1728073	9	9q33.3	DENND1A	DENN domain containing 1A	57706	2.51618	3.84425e-10	1.21495e-08
ILMN_1791123	21	21q22.3	TMPRSS2	transmembrane serine protease 2	7113	2.5105	1.47393e-09	3.80353e-08
ILMN_1673704	10	10q24.33	INA	internexin neuronal intermediate filament protein alpha	9118	2.50323	3.56861e-11	1.74019e-09
ILMN_1749071	1	1q42.12	CNIH3	cornichon family AMPA receptor auxiliary protein 3	149111	2.49968	9.90404e-13	9.16277e-11
ILMN_2131861	12	12q22	SOCS2	suppressor of cytokine signaling 2	8835	2.49692	2.53165e-10	8.62461e-09
ILMN_1714444	13	13q22.1	KLF12	Kruppel like factor 12	11278	2.49653	4.48597e-12	3.18227e-10
ILMN_1725889	X	Xq28	AFF2	AF4/FMR2 family member 2	2334	2.49466	2.90455e-07	3.33347e-06
ILMN_1723522	12	12p13.1	APOLD1	apolipoprotein L domain containing 1	81575	2.49299	5.56431e-08	8.07047e-07
ILMN_3251620	5	5q14.1	JMY	junction mediating and regulatory protein, p53 cofactor	133746	2.49136	5.45485e-11	2.44236e-09
ILMN_1659572	X	Xq12	AR	androgen receptor	367	2.49123	5.2015e-12	3.56172e-10
ILMN_1781173	7	7p21.1	HDAC9	histone deacetylase 9	9734	2.4885	1.07722e-10	4.25899e-09
ILMN_2194561	6	6q25.1	PLEKHG1	pleckstrin homology and RhoGEF domain containing G1	57480	2.48649	1.05541e-09	2.87639e-08
ILMN_1738725	22	22q12.2	LIF	LIF interleukin 6 family cytokine	3976	2.47882	4.57277e-10	1.4001e-08
ILMN_1793543	1	1q21.2	CIART	circadian associated repressor of transcription	148523	2.47074	9.00811e-10	2.51062e-08
ILMN_1721833	1	1q25.3	IER5	immediate early response 5	51278	2.4616	2.13646e-09	5.19806e-08
ILMN_1748883	19	19p13.2	CDKN2D	cyclin dependent kinase inhibitor 2D	1032	2.46127	5.33191e-10	1.59602e-08
ILMN_1656310	8	8p11.21	IDO1	indoleamine 2,3-dioxygenase 1	3620	2.45279	4.57482e-09	9.82076e-08
ILMN_1723042	7	7q11.23	CLDN3	claudin 3	1365	2.45185	3.28636e-10	1.06452e-08
ILMN_1766000	6	6q15	PM20D2	peptidase M20 domain containing 2	135293	2.45126	2.00241e-09	4.92233e-08
ILMN_1725387	6	6q23.1	TMEM200A	transmembrane protein 200A	114801	2.44839	8.88515e-10	2.48237e-08
ILMN_1733811	17	17q21.2	JUP	junction plakoglobin	3728	2.44657	6.43526e-12	4.20991e-10
ILMN_2210934	4	4q31.23	NR3C2	nuclear receptor subfamily 3 group C member 2	4306	2.44611	9.08233e-11	3.69248e-09
ILMN_1666076	2	2q21.1	ARHGEF4	Rho guanine nucleotide exchange factor 4	50649	2.44547	3.94751e-09	8.67949e-08
ILMN_1812262	6	6p21.33	DDR1	discoidin domain receptor tyrosine kinase 1	780	2.4396	8.21492e-12	5.15879e-10
ILMN_1658685	22	22q13.1	ELFN2	extracellular leucine rich repeat and fibronectin type III domain containing 2	114794	2.43952	2.26678e-10	7.87797e-09
ILMN_1785413	16	16q24.1	ATP2C2	ATPase secretory pathway Ca2+ transporting 2	9914	2.43094	3.53273e-09	7.90359e-08
ILMN_2351795	18	18p11.21	LDLRAD4	low density lipoprotein receptor class A domain containing 4	753	2.42869	2.75927e-11	1.4135e-09
ILMN_1697088	16	16p11.2	ARMC5	armadillo repeat containing 5	79798	2.42397	7.32592e-11	3.1375e-09
ILMN_1716651	6	6p21.1	RUNX2	RUNX family transcription factor 2	860	2.42141	9.61196e-12	5.87557e-10
ILMN_1702712	8	8q13.1	TRIM55	tripartite motif containing 55	84675	2.42069	2.87757e-09	6.66267e-08
ILMN_1732296	1	1p36.12	ID3	inhibitor of DNA binding 3, HLH protein	3399	2.41717	9.66012e-08	1.29639e-06
ILMN_1776953	20	20q11.23	MYL9	myosin light chain 9	10398	2.41659	4.20108e-10	1.31192e-08
ILMN_1688154	3	3p21.31	MST1R	macrophage stimulating 1 receptor	4486	2.41588	3.71617e-11	1.78438e-09
ILMN_1732921	7	7p21.1	ITGB8	integrin subunit beta 8	3696	2.4116	1.15311e-07	1.51793e-06
ILMN_2409793	16	16p11.2	MAZ	MYC associated zinc finger protein	4150	2.41155	4.32665e-06	3.5106e-05
ILMN_1776213	5	5q15	RGMB	repulsive guidance molecule BMP co-receptor b	285704	2.41111	1.08706e-10	4.28806e-09
ILMN_1806667	4	4q21.21	FRAS1	Fraser extracellular matrix complex subunit 1	80144	2.41096	2.58223e-10	8.76231e-09
ILMN_1684461	7	7q31.32	CADPS2	calcium dependent secretion activator 2	93664	2.40392	5.08334e-11	2.31205e-09
ILMN_1679268	2	2p14	PELI1	pellino E3 ubiquitin protein ligase 1	57162	2.40318	2.75597e-11	1.4135e-09
ILMN_1776925	16	16p13.3	PRSS22	serine protease 22	64063	2.40146	1.69054e-10	6.09059e-09
ILMN_1705814	12	12q13.13	KRT80	keratin 80	144501	2.39181	2.23367e-10	7.78646e-09
ILMN_1766918	6	6p21.2	KCNK5	potassium two pore domain channel subfamily K member 5	8645	2.38858	4.03353e-09	8.84042e-08
ILMN_2168314	6	6q14.1	PGM3	phosphoglucomutase 3	5238	2.38795	5.66761e-11	2.51152e-09
ILMN_1719547	7	7p14.1	INHBA	inhibin subunit beta A	3624	2.38356	8.1997e-11	3.41417e-09
ILMN_2309615	19	19q13.31	PSG6	pregnancy specific beta-1-glycoprotein 6	5675	2.38064	1.37278e-11	7.84872e-10
ILMN_1778523	9	9q21.12	KLF9	Kruppel like factor 9	687	2.3788	2.76109e-09	6.44928e-08
ILMN_2248863	3	3q23	ZBTB38	zinc finger and BTB domain containing 38	253461	2.37681	2.27026e-07	2.6959e-06
ILMN_2199313	9	9q34.3	NPDC1	neural proliferation, differentiation and control 1	56654	2.37304	8.05558e-07	8.07806e-06
ILMN_1775743	12	12q21.33	BTG1	BTG anti-proliferation factor 1	694	2.3708	2.36429e-12	1.84415e-10
ILMN_1684836	6	6q25.1	AKAP12	A-kinase anchoring protein 12	9590	2.36776	1.49848e-10	5.57299e-09
ILMN_1715669	11	11p11.2	TP53I11	tumor protein p53 inducible protein 11	9537	2.36387	1.47003e-08	2.63139e-07
ILMN_1792972	19	19p13.2	ZNF439	zinc finger protein 439	90594	2.36335	8.83767e-10	2.47512e-08
ILMN_2242299	1	1p36.32	AJAP1	adherens junctions associated protein 1	55966	2.35471	5.4986e-10	1.63141e-08
ILMN_1765109	1	1p36.31	TNFRSF25	TNF receptor superfamily member 25	8718	2.35387	4.21497e-10	1.31269e-08
ILMN_1806242	10	10q24.32	PSD	pleckstrin and Sec7 domain containing	5662	2.34832	7.60548e-08	1.05516e-06
ILMN_2160727	7	7p22.1	CYTH3	cytohesin 3	9265	2.34468	2.19177e-12	1.74109e-10
ILMN_1791202	14	14q24.2	SMOC1	SPARC related modular calcium binding 1	64093	2.34376	3.65068e-10	1.16322e-08
ILMN_1656904	2	2p14	SLC1A4	solute carrier family 1 member 4	6509	2.33931	1.33644e-10	5.06877e-09
ILMN_1658071	1	1q24.2	ATP1B1	ATPase Na+/K+ transporting subunit beta 1	481	2.33817	8.77868e-12	5.43364e-10
ILMN_1776121	2	2q11.2	CRACDL	CRACD like	343990	2.33676	1.34922e-10	5.10039e-09
ILMN_1653501	3	3p21.31	SEMA3B	semaphorin 3B	7869	2.33171	4.29666e-10	1.32854e-08
ILMN_1660067	17	17q21.2	KRTAP2-3	keratin associated protein 2-3	730755	2.33021	1.83957e-10	6.53824e-09
ILMN_1811729	19	19q13.32	CBLC	Cbl proto-oncogene C	23624	2.33002	3.25689e-11	1.62731e-09
ILMN_2368530	16	16p13.3	IL32	interleukin 32	9235	2.32788	6.59953e-10	1.92005e-08
ILMN_2308849	19	19q13.42	MYADM	myeloid associated differentiation marker	91663	2.3278	1.94506e-11	1.04497e-09
ILMN_1742534	X	Xq22.3	COL4A5	collagen type IV alpha 5 chain	1287	2.32669	3.92608e-10	1.23839e-08
ILMN_1805192	10	10q25.1	ITPRIP	inositol 1,4,5-trisphosphate receptor interacting protein	85450	2.32476	9.71466e-11	3.88993e-09
ILMN_2188264	1	1p22.3	CCN1	cellular communication network factor 1	3491	2.32165	1.23365e-11	7.1973e-10
ILMN_1682147	19	19p13.13	HOOK2	hook microtubule tethering protein 2	29911	2.31857	4.46821e-09	9.63576e-08
ILMN_1683682	11	11q12.2	DAGLA	diacylglycerol lipase alpha	747	2.31812	3.99e-08	6.14759e-07
ILMN_1735680	6	6q14.1	TMEM30A	transmembrane protein 30A	55754	2.31607	5.24602e-10	1.57683e-08
ILMN_3248511	8	8p23.1	FAM167A	family with sequence similarity 167 member A	83648	2.31586	7.77726e-10	2.21468e-08
ILMN_1808501	X	Xp22.12	SH3KBP1	SH3 domain containing kinase binding protein 1	30011	2.31212	6.74884e-12	4.37479e-10
ILMN_3244117	20	20q13.33	STMN3	stathmin 3	50861	2.30734	2.20062e-10	7.68677e-09
ILMN_1759097	1	1q21.3	MLLT11	MLLT11 transcription factor 7 cofactor	10962	2.30603	2.74821e-11	1.41203e-09
ILMN_1686906	20	20q11.22	TP53INP2	tumor protein p53 inducible nuclear protein 2	58476	2.30118	1.32156e-10	5.02895e-09
ILMN_2353054	19	19q13.41	KLK5	kallikrein related peptidase 5	25818	2.29952	1.12026e-08	2.09561e-07
ILMN_1790160	4	4q12	KIT	KIT proto-oncogene, receptor tyrosine kinase	3815	2.29438	2.17521e-08	3.66174e-07
ILMN_1789839	16	16p12.1	GTF3C1	general transcription factor IIIC subunit 1	2975	2.29392	1.52533e-10	5.63032e-09
ILMN_1749180	8	8q22.1	ESRP1	epithelial splicing regulatory protein 1	54845	2.29377	1.38844e-09	3.61539e-08
ILMN_1676423	6	6q16.2	CCNC	cyclin C	892	2.29165	1.31904e-10	5.02488e-09
ILMN_2379644	5	5q33.1	CD74	CD74 molecule	972	2.29129	4.14035e-12	2.9738e-10
ILMN_2388975	22	22q13.31	CERK	ceramide kinase	64781	2.29006	1.05076e-10	4.16393e-09
ILMN_1688892	18	18q11.2	LAMA3	laminin subunit alpha 3	3909	2.28998	3.12513e-10	1.02611e-08
ILMN_1666078	6	6p22.1	HLA-H	major histocompatibility complex, class I, H (pseudogene)	3136	2.27501	1.87387e-09	4.65778e-08
ILMN_1805466	17	17q24.3	SOX9	SRY-box transcription factor 9	6662	2.27447	1.01256e-09	2.77497e-08
ILMN_1775042	2	2q36.3	DAW1	dynein assembly factor with WD repeats 1	164781	2.2742	2.60086e-10	8.80818e-09
ILMN_1743340	15	15q15.1	CHST14	carbohydrate sulfotransferase 14	113189	2.27373	2.34786e-10	8.13514e-09
ILMN_1724700	18	18q11.2	RIOK3	RIO kinase 3	8780	2.26891	5.21061e-10	1.56892e-08
ILMN_1770673	9	9q32	AKNA	AT-hook transcription factor	80709	2.26711	3.68695e-09	8.20602e-08
ILMN_1662038	22	22q12.3	LARGE1	LARGE xylosyl- and glucuronyltransferase 1	9215	2.26692	2.93138e-12	2.21628e-10
ILMN_1751425	9	9p24.1	ERMP1	endoplasmic reticulum metallopeptidase 1	79956	2.26446	1.35828e-10	5.12902e-09
ILMN_1798256	7	7p12.3	UPP1	uridine phosphorylase 1	7378	2.26291	1.23189e-10	4.77734e-09
ILMN_1679071	5	5q14.1	MTX3	metaxin 3	345778	2.25957	2.22467e-11	1.1679e-09
ILMN_1656422	3	3q25.1	GPR87	G protein-coupled receptor 87	53836	2.25943	3.53393e-10	1.13336e-08
ILMN_1718977	19	19p13.3	GADD45B	growth arrest and DNA damage inducible beta	4616	2.25832	1.50389e-10	5.58708e-09
ILMN_1778401	6	6p21.33	HLA-B	major histocompatibility complex, class I, B	3106	2.25084	3.87587e-11	1.8431e-09
ILMN_1794863	1	1p36.12	CAMK2N1	calcium/calmodulin dependent protein kinase II inhibitor 1	55450	2.24894	7.01553e-08	9.87617e-07
ILMN_1701998	4	4p16.1	AFAP1	actin filament associated protein 1	60312	2.24887	1.24083e-09	3.2932e-08
ILMN_1652244	6	6q21	POPDC3	popeye domain containing 3	64208	2.24587	2.48685e-09	5.8966e-08
ILMN_1710209	2	2q32.2	MFSD6	major facilitator superfamily domain containing 6	54842	2.24503	5.97965e-10	1.76313e-08
ILMN_2404688	16	16p11.2	NUPR1	nuclear protein 1, transcriptional regulator	26471	2.24423	1.51046e-08	2.69538e-07
ILMN_1684211	22	22q12.2	SEC14L2	SEC14 like lipid binding 2	23541	2.2437	6.37635e-09	1.30386e-07
ILMN_1727200	20	20q13.33	SLCO4A1	solute carrier organic anion transporter family member 4A1	28231	2.24184	1.76782e-11	9.65883e-10
ILMN_2271627	16	16p11.2	ATXN2L	ataxin 2 like	11273	2.24056	1.50314e-07	1.90174e-06
ILMN_1654488	X	Xp11.3	KDM6A	lysine demethylase 6A	7403	2.2381	5.49924e-11	2.45267e-09
ILMN_1784300	2	2q35	TUBA4A	tubulin alpha 4a	7277	2.23475	4.54623e-09	9.77157e-08
ILMN_2349061	11	11p15.5	IRF7	interferon regulatory factor 7	3665	2.23369	2.60164e-12	2.0021e-10
ILMN_1669268	19	19p13.3	MEX3D	mex-3 RNA binding family member D	399664	2.23257	1.65074e-09	4.16625e-08
ILMN_1695423	12	12p13.31	CD9	CD9 molecule	928	2.23151	1.99008e-08	3.39149e-07
ILMN_1745112	9	9q34.11	FAM102A	family with sequence similarity 102 member A	399665	2.23058	5.57553e-11	2.48029e-09
ILMN_1685873	22	22q13.2	ZC3H7B	zinc finger CCCH-type containing 7B	23264	2.2279	3.51663e-10	1.12886e-08
ILMN_2074801	19	19p13.2	RGL3	ral guanine nucleotide dissociation stimulator like 3	57139	2.22345	8.81038e-11	3.5989e-09
ILMN_3251737	6	6q13	EEF1A1	eukaryotic translation elongation factor 1 alpha 1	1915	2.22318	1.57326e-10	5.75794e-09
ILMN_1808811	19	19p13.3	SBNO2	strawberry notch homolog 2	22904	2.22195	2.06127e-09	5.04717e-08
ILMN_1788783	6	6p12.2	TRAM2	translocation associated membrane protein 2	9697	2.21983	2.02283e-11	1.08187e-09
ILMN_1694548	4	4q21.21	ANXA3	annexin A3	306	2.21879	1.48989e-10	5.54703e-09
ILMN_1705922	17	17q25.3	BAIAP2	BAR/IMD domain containing adaptor protein 2	10458	2.21658	1.46809e-08	2.62929e-07
ILMN_2336609	11	11q14.1	SYTL2	synaptotagmin like 2	54843	2.21403	3.46404e-11	1.70609e-09
ILMN_1807969	5	5q23.2	SNCAIP	synuclein alpha interacting protein	9627	2.21379	3.62077e-11	1.75569e-09
ILMN_1806502	6	6p22.1	ZNF165	zinc finger protein 165	7718	2.21047	5.01882e-10	1.52583e-08
ILMN_1663042	20	20q13.12	SDC4	syndecan 4	6385	2.20623	8.75329e-11	3.58653e-09
ILMN_1738742	8	8p11.21	PLAT	plasminogen activator, tissue type	5327	2.2041	1.52105e-10	5.62659e-09
ILMN_1652445	7	7p22.1	RAC1	Rac family small GTPase 1	5879	2.20334	6.11952e-08	8.76877e-07
ILMN_1707748	22	22q13.33	PIM3	Pim-3 proto-oncogene, serine/threonine kinase	415116	2.20333	3.17686e-10	1.04091e-08
ILMN_1748707	22	22q13.33	CRELD2	cysteine rich with EGF like domains 2	79174	2.20149	3.41357e-11	1.69089e-09
ILMN_1688158	6	6q14.2	CYB5R4	cytochrome b5 reductase 4	51167	2.20042	4.21344e-09	9.1764e-08
ILMN_1703477	1	1q22	ARHGEF2	Rho/Rac guanine nucleotide exchange factor 2	9181	2.19892	2.86356e-12	2.17454e-10
ILMN_1796417	7	7q21.3	ASNS	asparagine synthetase (glutamine-hydrolyzing)	440	2.19845	1.46034e-11	8.23096e-10
ILMN_1725852	1	1q21.3	S100A2	S100 calcium binding protein A2	6273	2.19574	1.23407e-09	3.2778e-08
ILMN_1742054	8	8p23.1	RP1L1	RP1 like 1	94137	2.19179	1.84542e-12	1.51123e-10
ILMN_1753830	17	17q21.31	ETV4	ETS variant transcription factor 4	2118	2.18946	5.48793e-10	1.62965e-08
ILMN_1756312	15	15q24.1	SEMA7A	semaphorin 7A (John Milton Hagen blood group)	8482	2.18884	1.15339e-10	4.50842e-09
ILMN_1801043	9	9q33.2	GSN	gelsolin	2934	2.18746	2.46365e-08	4.08154e-07
ILMN_2038775	6	6p25.2	TUBB2A	tubulin beta 2A class IIa	7280	2.18637	7.53994e-11	3.20922e-09
ILMN_3245983	5	5q35.1	NEURL1B	neuralized E3 ubiquitin protein ligase 1B	54492	2.18108	4.00869e-08	6.1698e-07
ILMN_1663976	5	5q31.1	PDLIM4	PDZ and LIM domain 4	8572	2.17667	1.26984e-10	4.86973e-09
ILMN_1728298	16	16p12.1	SBK1	SH3 domain binding kinase 1	388228	2.17638	3.51016e-09	7.8633e-08
ILMN_1813175	19	19p13.12	ADGRL1	adhesion G protein-coupled receptor L1	22859	2.17359	2.13183e-11	1.13421e-09
ILMN_2120210	6	6p12.3	RCAN2	regulator of calcineurin 2	10231	2.1735	5.92561e-11	2.60244e-09
ILMN_1669928	1	1p36.32	ARHGEF16	Rho guanine nucleotide exchange factor 16	27237	2.17341	3.13252e-11	1.5743e-09
ILMN_2400583	X	Xp11.4	USP9X	ubiquitin specific peptidase 9 X-linked	8239	2.17334	1.00901e-08	1.91451e-07
ILMN_2366212	17	17q23.3	CD79B	CD79b molecule	974	2.17243	2.24478e-07	2.67235e-06
ILMN_1718646	16	16q21	MMP15	matrix metallopeptidase 15	4324	2.16988	5.10645e-10	1.54294e-08
ILMN_1732717	19	19q13.33	FAM71E1	family with sequence similarity 71 member E1	112703	2.16575	4.70182e-09	1.00558e-07
ILMN_1691884	5	5q35.2	STC2	stanniocalcin 2	8614	2.16527	1.20253e-11	7.07483e-10
ILMN_1669523	14	14q24.3	FOS	Fos proto-oncogene, AP-1 transcription factor subunit	2353	2.16263	6.37656e-07	6.56626e-06
ILMN_1798081	1	1p34.2	PTPRF	protein tyrosine phosphatase receptor type F	5792	2.16252	3.45529e-11	1.70422e-09
ILMN_2055523	8	8p21.3	CSGALNACT1	chondroitin sulfate N-acetylgalactosaminyltransferase 1	55790	2.16053	4.21734e-11	1.97819e-09
ILMN_1700967	3	3q29	MB21D2	Mab-21 domain containing 2	151963	2.1572	1.72218e-10	6.19123e-09
ILMN_1734950	15	15q24.1	LOXL1	lysyl oxidase like 1	4016	2.15607	1.06944e-09	2.90773e-08
ILMN_2168347	19	19p13.2	EPOR	erythropoietin receptor	2057	2.1544	1.12845e-11	6.68459e-10
ILMN_1714228	2	2p16.2	SPTBN1	spectrin beta, non-erythrocytic 1	6711	2.14979	3.60047e-08	5.6474e-07
ILMN_1751328	8	8q24.3	FAM83H	family with sequence similarity 83 member H	286077	2.14922	8.80393e-11	3.5989e-09
ILMN_3242105	2	2q21.2	LYPD1	LY6/PLAUR domain containing 1	116372	2.14624	1.88778e-11	1.02011e-09
ILMN_1656482	20	20q13.33	OSBPL2	oxysterol binding protein like 2	9885	2.14362	2.15033e-11	1.14201e-09
ILMN_1660727	6	6p21.1	ENPP5	ectonucleotide pyrophosphatase/phosphodiesterase family member 5	59084	2.14109	3.6025e-09	8.03898e-08
ILMN_1767113	2	2q33.1	AOX1	aldehyde oxidase 1	316	2.13906	1.91011e-08	3.28936e-07
ILMN_2049417	19	19q13.42	TMEM86B	transmembrane protein 86B	255043	2.13107	3.17924e-10	1.04091e-08
ILMN_1700831	15	15q21.2	SLC27A2	solute carrier family 27 member 2	11001	2.13058	5.98348e-10	1.76313e-08
ILMN_1785060	10	10q23.1	TSPAN14	tetraspanin 14	81619	2.13003	2.23822e-11	1.17094e-09
ILMN_1735192	2	2p25.3	COLEC11	collectin subfamily member 11	78989	2.12987	9.9738e-09	1.89557e-07
ILMN_2384561	9	9q21.11	TJP2	tight junction protein 2	9414	2.12981	5.24397e-10	1.57683e-08
ILMN_2388484	2	2q34	MAP2	microtubule associated protein 2	4133	2.12504	1.38447e-08	2.5148e-07
ILMN_2184966	8	8q24.13	ZHX2	zinc fingers and homeoboxes 2	22882	2.11823	6.09377e-10	1.79123e-08
ILMN_3251227	22	22q13.31	TBC1D22A	TBC1 domain family member 22A	25771	2.11283	1.89509e-08	3.27003e-07
ILMN_1691376	20	20p12.2	JAG1	jagged canonical Notch ligand 1	182	2.1104	1.79467e-08	3.12648e-07
ILMN_1672743	20	20q13.12	ZNF334	zinc finger protein 334	55713	2.10854	4.44219e-09	9.58979e-08
ILMN_1684694	8	8p11.21	ANK1	ankyrin 1	286	2.10604	3.50892e-09	7.8633e-08
ILMN_1779147	5	5q13.3	ENC1	ectodermal-neural cortex 1	8507	2.10532	9.36583e-11	3.78712e-09
ILMN_1724350	5	5q22.3	TRIM36	tripartite motif containing 36	55521	2.1052	9.49779e-11	3.82978e-09
ILMN_1776395	10	10p12.1	ARMC4	armadillo repeat containing 4	55130	2.10495	1.58476e-09	4.02922e-08
ILMN_1682738	15	15q22.33	SMAD3	SMAD family member 3	4088	2.09873	1.31582e-10	5.01816e-09
ILMN_1709044	20	20q11.23	TGIF2	TGFB induced factor homeobox 2	60436	2.09815	8.38759e-11	3.47561e-09
ILMN_1759250	6	6p21.32	TAP2	transporter 2, ATP binding cassette subfamily B member	6891	2.09739	2.9011e-07	3.33061e-06
ILMN_1714586	3	3p12.1	VGLL3	vestigial like family member 3	389136	2.09505	8.01539e-11	3.37019e-09
ILMN_1668639	16	16p11.2	TBC1D10B	TBC1 domain family member 10B	26000	2.09444	2.68902e-08	4.4125e-07
ILMN_2090105	1	1q23.2	TAGLN2	transgelin 2	8407	2.08726	5.08597e-10	1.5381e-08
ILMN_1848552	9	9p23-p22.3	NFIB	nuclear factor I B	4781	2.08572	1.68798e-10	6.09059e-09
ILMN_2400372	16	16p11.2	SULT1A2	sulfotransferase family 1A member 2	6799	2.08192	3.04192e-10	1.00261e-08
ILMN_1787509	20	20q13.33	HELZ2	helicase with zinc finger 2	85441	2.08145	1.18497e-10	4.61755e-09
ILMN_1658807	16	16p13.3	HMOX2	heme oxygenase 2	3163	2.08127	4.22204e-09	9.18933e-08
ILMN_1676197	6	6q25.1	LRP11	LDL receptor related protein 11	84918	2.07999	7.37502e-08	1.02857e-06
ILMN_1655563	18	18q21.1	CTIF	cap binding complex dependent translation initiation factor	9811	2.07991	3.84475e-10	1.21495e-08
ILMN_1762861	6	6p22.1	HLA-F	major histocompatibility complex, class I, F	3134	2.07836	8.60945e-09	1.66752e-07
ILMN_1794782	21	21q22.3	ABCG1	ATP binding cassette subfamily G member 1	9619	2.07832	2.90146e-10	9.64617e-09
ILMN_2064150	19	19q13.33	PRRG2	proline rich and Gla domain 2	5639	2.07794	1.12162e-10	4.40922e-09
ILMN_2176450	8	8q21.2	CA3	carbonic anhydrase 3	761	2.073	3.18554e-10	1.04099e-08
ILMN_1774739	14	14q11.2	MMP14	matrix metallopeptidase 14	4323	2.07028	3.81231e-08	5.91509e-07
ILMN_1658015	13	13q32.1	MBNL2	muscleblind like splicing regulator 2	10150	2.06874	6.49053e-09	1.32485e-07
ILMN_1692219	8	8p11.23	RAB11FIP1	RAB11 family interacting protein 1	80223	2.06175	4.57986e-09	9.82546e-08
ILMN_1765636	19	19p13.2	PRR36	proline rich 36	80164	2.05827	8.93592e-10	2.49251e-08
ILMN_1652287	17	17q22	NOG	noggin	9241	2.05479	1.58835e-10	5.80084e-09
ILMN_1672049	12	12q24.32	LINC00944	long intergenic non-protein coding RNA 944	387895	2.05346	1.16427e-09	3.12125e-08
ILMN_2305225	16	16q21	NDRG4	NDRG family member 4	65009	2.05194	3.7232e-10	1.18087e-08
ILMN_1810274	17	17q21.32	HOXB2	homeobox B2	3212	2.05179	1.14647e-09	3.09037e-08
ILMN_1715096	6	6q16.2	FAXC	failed axon connections homolog, metaxin like GST domain containing	84553	2.05126	4.78531e-08	7.12958e-07
ILMN_1664016	19	19p13.2	ARHGEF18	Rho/Rac guanine nucleotide exchange factor 18	23370	2.04713	8.83931e-11	3.60644e-09
ILMN_2162253	4	4q12	NMU	neuromedin U	10874	2.04643	9.5943e-10	2.64618e-08
ILMN_1815445	X	Xq28	IDS	iduronate 2-sulfatase	3423	2.04628	3.65469e-11	1.76577e-09
ILMN_1808999	1	1p36.13	ARHGEF19	Rho guanine nucleotide exchange factor 19	128272	2.04314	9.57931e-12	5.86601e-10
ILMN_1720511	3	3p26.2	LRRN1	leucine rich repeat neuronal 1	57633	2.04259	1.52391e-09	3.90502e-08
ILMN_1663113	22	22q13.2	TTLL12	tubulin tyrosine ligase like 12	23170	2.04189	5.35459e-09	1.12839e-07
ILMN_1672720	4	4q26	PRSS12	serine protease 12	8492	2.04106	2.0322e-09	4.98309e-08
ILMN_1790211	7	7p12.3	C7orf57	chromosome 7 open reading frame 57	136288	2.04095	5.70244e-09	1.18647e-07
ILMN_1742461	1	1q23.3	UAP1	UDP-N-acetylglucosamine pyrophosphorylase 1	6675	2.03984	1.04173e-09	2.84359e-08
ILMN_1815079	19	19p13.3	TICAM1	toll like receptor adaptor molecule 1	148022	2.03855	1.37714e-08	2.50414e-07
ILMN_1677018	7	7p15.2	HOXA4	homeobox A4	3201	2.03535	1.56458e-09	3.98948e-08
ILMN_3240912	20	20p12.3	LRRN4	leucine rich repeat neuronal 4	164312	2.03534	1.14314e-10	4.47344e-09
ILMN_2114720	20	20q13.12	SLPI	secretory leukocyte peptidase inhibitor	6590	2.03192	2.97118e-10	9.83055e-09
ILMN_1801068	14	14q23.1	DACT1	dishevelled binding antagonist of beta catenin 1	51339	2.03172	1.32994e-09	3.48676e-08
ILMN_3251560	5	5q14.2	TMEM167A	transmembrane protein 167A	153339	2.02903	3.92164e-09	8.63361e-08
ILMN_1702396	22	22q13.2	PACSIN2	protein kinase C and casein kinase substrate in neurons 2	11252	2.02732	6.30882e-12	4.13503e-10
ILMN_2385178	1	1p36.33	MIB2	mindbomb E3 ubiquitin protein ligase 2	142678	2.02546	6.18663e-09	1.27186e-07
ILMN_1800540	1	1q32.2	CD55	CD55 molecule (Cromer blood group)	1604	2.02077	4.31385e-09	9.34784e-08
ILMN_1816342	17	17p11.2	MTRNR2L1	MT-RNR2 like 1	100462977	2.02051	2.71303e-09	6.36288e-08
ILMN_2054213	13	13q12.11	MPHOSPH8	M-phase phosphoprotein 8	54737	2.01952	7.04045e-11	3.03029e-09
ILMN_2084059	16	16q22.1	SLC12A4	solute carrier family 12 member 4	6560	2.01911	1.42621e-08	2.56896e-07
ILMN_2143250	11	11p15.3	FAR1	fatty acyl-CoA reductase 1	84188	2.019	1.85075e-08	3.20797e-07
ILMN_1795930	5	5p13.1	PTGER4	prostaglandin E receptor 4	5734	2.0187	1.0191e-10	4.06651e-09
ILMN_1743402	14	14q23.1	SIX4	SIX homeobox 4	51804	2.01763	8.12871e-11	3.3928e-09
ILMN_2070570	17	17q24.3	ABCA10	ATP binding cassette subfamily A member 10	10349	2.01226	2.07086e-09	5.06504e-08
ILMN_2115991	19	19q13.42	TNNT1	troponin T1, slow skeletal type	7138	2.01174	2.1856e-10	7.64206e-09
ILMN_2139761	4	4p13	LIMCH1	LIM and calponin homology domains 1	22998	2.01068	7.40896e-07	7.50385e-06
ILMN_3247223	6	6q14.1	TPBG	trophoblast glycoprotein	7162	2.00949	9.74543e-09	1.85421e-07
ILMN_2366642	X	Xp22.31	VCX3A	variable charge X-linked 3A	51481	2.00715	4.79701e-11	2.20803e-09
ILMN_1778242	14	14q32.11	CALM1	calmodulin 1	801	2.00605	4.49346e-11	2.09064e-09
ILMN_2154654	6	6q12	PTP4A1	protein tyrosine phosphatase 4A1	7803	2.00488	6.75404e-09	1.3678e-07
ILMN_1720406	17	17q21.32	HOXB9	homeobox B9	3219	2.00212	1.62647e-07	2.03831e-06
ILMN_1754103	3	3q26.2	CLDN11	claudin 11	5010	2.0002	1.18812e-08	2.20817e-07
ILMN_1673566	21	21q21.3	ADAMTS1	ADAM metallopeptidase with thrombospondin type 1 motif 1	9510	1.9994	7.37011e-11	3.1525e-09
ILMN_2179717	9	9q21.12	FAM189A2	family with sequence similarity 189 member A2	9413	1.9943	3.34843e-11	1.66341e-09
ILMN_1803850	10	10q22.1	TSPAN15	tetraspanin 15	23555	1.99391	3.72395e-07	4.12554e-06
ILMN_1719883	19	19p13.12	CYP4F11	cytochrome P450 family 4 subfamily F member 11	57834	1.98993	1.87625e-09	4.66034e-08
ILMN_1675479	16	16p11.2	ZNF646	zinc finger protein 646	9726	1.98776	4.72132e-08	7.04641e-07
ILMN_1680856	X	Xq28	MAMLD1	mastermind like domain containing 1	10046	1.98675	2.25878e-09	5.46481e-08
ILMN_1795300	5	5q32	ARHGEF37	Rho guanine nucleotide exchange factor 37	389337	1.97972	4.80118e-08	7.15013e-07
ILMN_1672947	5	5q15	CAST	calpastatin	831	1.97901	1.04284e-09	2.84438e-08
ILMN_1756238	6	6p21.2	TMEM217	transmembrane protein 217	221468	1.9786	7.42055e-07	7.51339e-06
ILMN_1672660	18	18q23	MBP	myelin basic protein	4155	1.97822	6.54067e-11	2.83643e-09
ILMN_1786379	16	16p13.3	SYNGR3	synaptogyrin 3	9143	1.9762	4.32983e-10	1.33759e-08
ILMN_1793630	2	2q35	SLC4A3	solute carrier family 4 member 3	6508	1.97565	1.94428e-09	4.812e-08
ILMN_1770454	1	1p36.33	AGRN	agrin	375790	1.97434	1.8593e-10	6.59477e-09
ILMN_1723141	10	10p12.2	OTUD1	OTU deubiquitinase 1	220213	1.97405	9.2824e-10	2.56763e-08
ILMN_1719792	3	3q13.2	PHLDB2	pleckstrin homology like domain family B member 2	90102	1.97068	1.16316e-08	2.16646e-07
ILMN_1712708	17	17q25.1	TRIM47	tripartite motif containing 47	91107	1.96745	4.18607e-10	1.30842e-08
ILMN_1769282	14	14q22.1	FRMD6	FERM domain containing 6	122786	1.96716	1.18438e-09	3.17024e-08
ILMN_1705900	22	22q13.31	ATXN10	ataxin 10	25814	1.96644	8.94726e-09	1.72424e-07
ILMN_1717706	5	5q11.2	PLK2	polo like kinase 2	10769	1.9647	5.38306e-09	1.13301e-07
ILMN_1717477	8	8p22	PSD3	pleckstrin and Sec7 domain containing 3	23362	1.96428	4.7822e-07	5.10911e-06
ILMN_1671932	22	22q13.31	SAMM50	SAMM50 sorting and assembly machinery component	25813	1.96421	3.10552e-11	1.56758e-09
ILMN_1727087	6	6q22.31	GJA1	gap junction protein alpha 1	2697	1.96307	8.68876e-08	1.18401e-06
ILMN_1803788	14	14q22.3	LGALS3	galectin 3	3958	1.96084	8.86347e-08	1.20448e-06
ILMN_1671800	16	16q12.2	CRNDE	colorectal neoplasia differentially expressed	643911	1.95923	3.14359e-08	5.02683e-07
ILMN_1720531	19	19p13.3	KDM4B	lysine demethylase 4B	23030	1.95799	6.66472e-10	1.93249e-08
ILMN_2405254	17	17q12	GRB7	growth factor receptor bound protein 7	2886	1.95576	2.85731e-09	6.63359e-08
ILMN_1703487	1	1p22.3	LMO4	LIM domain only 4	8543	1.95437	2.43372e-09	5.79053e-08
ILMN_3307483	13	13q34	MCF2L	MCF.2 cell line derived transforming sequence like	23263	1.95304	2.35832e-08	3.92211e-07
ILMN_1676629	2	2q14.1-q14.2	INSIG2	insulin induced gene 2	51141	1.95297	2.48357e-09	5.89288e-08
ILMN_1739156	6	6q14.1	DOP1A	DOP1 leucine zipper like protein A	23033	1.95288	2.55877e-08	4.21203e-07
ILMN_2374865	1	1q32.3	ATF3	activating transcription factor 3	467	1.95081	9.29639e-08	1.2549e-06
ILMN_1726368	19	19q13.43	ZNF135	zinc finger protein 135	7694	1.94947	9.54903e-07	9.31294e-06
ILMN_1716758	5	5q31.3	PCDH1	protocadherin 1	5097	1.94698	3.42978e-08	5.41663e-07
ILMN_1659771	14	14q22.3	RPL13AP3	ribosomal protein L13a pseudogene 3	645683	1.94412	3.0948e-10	1.01809e-08
ILMN_1725166	4	4p16.3	POLN	DNA polymerase nu	353497	1.94102	2.16822e-09	5.26419e-08
ILMN_1712577	5	5q21.1	FAM174A	family with sequence similarity 174 member A	345757	1.939	1.64265e-09	4.15053e-08
ILMN_1708858	22	22q13.1	CSNK1E	casein kinase 1 epsilon	1454	1.93813	1.59049e-09	4.03576e-08
ILMN_1762714	6	6q22.1	VGLL2	vestigial like family member 2	245806	1.93283	4.92882e-08	7.30551e-07
ILMN_1768101	17	17q21.32	HOXB6	homeobox B6	3216	1.93173	1.47909e-08	2.64351e-07
ILMN_1815745	6	6p22.3	SOX4	SRY-box transcription factor 4	6659	1.92998	1.43227e-07	1.8275e-06
ILMN_1777261	7	7q31.31	FAM3C	FAM3 metabolism regulating signaling molecule C	10447	1.92628	6.44261e-10	1.87915e-08
ILMN_1699354	1	1p36.13	EPHA2	EPH receptor A2	1969	1.92534	1.43491e-10	5.36552e-09
ILMN_1760303	5	5q13.1	PIK3R1	phosphoinositide-3-kinase regulatory subunit 1	5295	1.92275	7.64022e-09	1.51469e-07
ILMN_1664348	X	Xp22.31	PNPLA4	patatin like phospholipase domain containing 4	8228	1.92262	4.52197e-08	6.81379e-07
ILMN_1763447	22	22q13.33	PLXNB2	plexin B2	23654	1.91797	1.42863e-09	3.70884e-08
ILMN_1708369	19	19p13.11	EPS15L1	epidermal growth factor receptor pathway substrate 15 like 1	58513	1.91667	1.54664e-10	5.68463e-09
ILMN_1685122	1	1p34.2	COL9A2	collagen type IX alpha 2 chain	1298	1.9139	4.81943e-08	7.16802e-07
ILMN_1680139	22	22q13.1	MAFF	MAF bZIP transcription factor F	23764	1.91041	6.94965e-09	1.40033e-07
ILMN_1779648	1	1q42.13	H2AW	H2A.W histone	92815	1.90942	4.60376e-08	6.90985e-07
ILMN_1671557	11	11p15.4	PHLDA2	pleckstrin homology like domain family A member 2	7262	1.90903	5.98797e-09	1.23692e-07
ILMN_1758938	9	9q32	SLC31A2	solute carrier family 31 member 2	1318	1.90822	9.78662e-10	2.69492e-08
ILMN_1702125	17	17q21.32	HOXB7	homeobox B7	3217	1.90507	8.12051e-09	1.58799e-07
ILMN_1784822	X	Xp11.23	PPP1R3F	protein phosphatase 1 regulatory subunit 3F	89801	1.90476	2.37161e-09	5.6796e-08
ILMN_3241099	5	5q15	FAM172A	family with sequence similarity 172 member A	83989	1.90417	4.25443e-09	9.2307e-08
ILMN_1779064	11	11q13.2	KLC2	kinesin light chain 2	64837	1.90339	4.52474e-07	4.87027e-06
ILMN_1716988	1	1q43	OPN3	opsin 3	23596	1.902	2.47475e-10	8.48106e-09
ILMN_1755364	7	7p14.1	RALA	RAS like proto-oncogene A	5898	1.89863	1.27206e-10	4.87282e-09
ILMN_1792455	3	3p21.31	TMEM158	transmembrane protein 158	25907	1.89659	1.67871e-09	4.22139e-08
ILMN_1780153	19	19p13.2	QTRT1	queuine tRNA-ribosyltransferase catalytic subunit 1	81890	1.89625	2.84295e-09	6.60914e-08
ILMN_1775170	16	16q13	MT1X	metallothionein 1X	4501	1.89518	6.97776e-06	5.3058e-05
ILMN_2330307	11	11q12.1	SLC43A3	solute carrier family 43 member 3	29015	1.89494	4.20885e-10	1.31269e-08
ILMN_1703955	8	8q24.13	FBXO32	F-box protein 32	114907	1.89307	4.38517e-09	9.48452e-08
ILMN_1801762	20	20q13.2	PFDN4	prefoldin subunit 4	5203	1.89162	6.63329e-08	9.40335e-07
ILMN_2095840	8	8p11.21	KAT6A	lysine acetyltransferase 6A	7994	1.89043	3.89881e-07	4.29031e-06
ILMN_1740555	20	20p12.2	SNAP25	synaptosome associated protein 25	6616	1.88817	5.18347e-07	5.47001e-06
ILMN_1782419	7	7q21.3	GNG11	G protein subunit gamma 11	2791	1.88806	1.027e-10	4.09328e-09
ILMN_1787251	14	14q23.1	DAAM1	dishevelled associated activator of morphogenesis 1	23002	1.88769	1.32716e-06	1.24065e-05
ILMN_1719392	1	1q43	FH	fumarate hydratase	2271	1.88613	9.59579e-11	3.85576e-09
ILMN_1785141	11	11p15.3	MICAL2	microtubule associated monooxygenase, calponin and LIM domain containing 2	9645	1.88578	1.08345e-07	1.43647e-06
ILMN_1717639	21	21q22.3	SIK1	salt inducible kinase 1	150094	1.88521	1.36829e-09	3.57158e-08
ILMN_1700584	19	19p13.13	IER2	immediate early response 2	9592	1.88488	3.171e-09	7.23038e-08
ILMN_1690442	18	18q11.2	TMEM241	transmembrane protein 241	85019	1.87951	1.79037e-06	1.607e-05
ILMN_1787919	22	22q13.31	PARVB	parvin beta	29780	1.877	8.34861e-08	1.14399e-06
ILMN_1729142	17	17p11.2	CENPV	centromere protein V	201161	1.87693	2.31053e-09	5.57048e-08
ILMN_1762106	16	16q12.2	MMP2	matrix metallopeptidase 2	4313	1.87369	3.26059e-10	1.06149e-08
ILMN_1688848	3	3q29	TMEM44	transmembrane protein 44	93109	1.87341	8.44737e-10	2.38324e-08
ILMN_1745623	11	11p15.5	CRACR2B	calcium release activated channel regulator 2B	283229	1.87269	1.34031e-08	2.45268e-07
ILMN_1719097	18	18q11.2	RMC1	regulator of MON1-CCZ1	29919	1.87037	1.0021e-09	2.75068e-08
ILMN_1651902	13	13q12.2	RASL11A	RAS like family 11 member A	387496	1.86907	2.61703e-07	3.05226e-06
ILMN_1724941	3	3p21.31	CDCP1	CUB domain containing protein 1	64866	1.86768	7.77926e-10	2.21468e-08
ILMN_2059886	22	22q13.31	TTC38	tetratricopeptide repeat domain 38	55020	1.86704	2.70434e-10	9.1228e-09
ILMN_1805998	18	18q12.2	C18orf21	chromosome 18 open reading frame 21	83608	1.86654	9.18799e-10	2.55044e-08
ILMN_1694475	6	6p21.1	GTPBP2	GTP binding protein 2	54676	1.86653	4.74222e-08	7.07455e-07
ILMN_1658989	15	15q25.2	MEX3B	mex-3 RNA binding family member B	84206	1.86609	6.23944e-08	8.91466e-07
ILMN_1745772	6	6q16.3	ASCC3	activating signal cointegrator 1 complex subunit 3	10973	1.86211	1.92357e-09	4.77444e-08
ILMN_1684886	X	Xp22.31	VCX	variable charge X-linked	26609	1.86084	8.2845e-09	1.61183e-07
ILMN_1775304	19	19p13.12	DNAJB1	DnaJ heat shock protein family (Hsp40) member B1	3337	1.85982	2.363e-10	8.17118e-09
ILMN_1683905	19	19p13.3	MISP	mitotic spindle positioning	126353	1.85672	6.32365e-09	1.29539e-07
ILMN_1815023	6	6p21.2	PIM1	Pim-1 proto-oncogene, serine/threonine kinase	5292	1.85667	9.97426e-10	2.74221e-08
ILMN_1679754	5	5q33.3	ADRA1B	adrenoceptor alpha 1B	147	1.85595	5.82195e-08	8.39822e-07
ILMN_1808202	19	19p13.3	R3HDM4	R3H domain containing 4	91300	1.85561	1.76718e-07	2.18135e-06
ILMN_1667319	19	19p13.2	PLPPR2	phospholipid phosphatase related 2	64748	1.85421	6.9203e-09	1.39605e-07
ILMN_1671891	2	2q36.3	PID1	phosphotyrosine interaction domain containing 1	55022	1.85385	1.82528e-08	3.1686e-07
ILMN_1655225	19	19p13.3	C19orf25	chromosome 19 open reading frame 25	148223	1.85299	2.70889e-07	3.14027e-06
ILMN_1654319	15	15q26.1	HAPLN3	hyaluronan and proteoglycan link protein 3	145864	1.8529	1.23661e-07	1.60941e-06
ILMN_1680018	21	21q22.3	RIPK4	receptor interacting serine/threonine kinase 4	54101	1.84961	1.84834e-10	6.56265e-09
ILMN_1784532	8	8q24.23-q24.3	COL22A1	collagen type XXII alpha 1 chain	169044	1.84756	4.45667e-08	6.73896e-07
ILMN_1655611	20	20q13.2	TSHZ2	teashirt zinc finger homeobox 2	128553	1.84727	2.61872e-09	6.16029e-08
ILMN_1802106	22	22q13.1	APOBEC3G	apolipoprotein B mRNA editing enzyme catalytic subunit 3G	60489	1.84364	2.48102e-10	8.49412e-09
ILMN_1796377	14	14q23.1	ARMH4	armadillo like helical domain containing 4	145407	1.83951	5.67974e-10	1.68081e-08
ILMN_1689874	17	17q21.32	HOXB3	homeobox B3	3213	1.83716	6.68275e-07	6.83866e-06
ILMN_1722872	22	22q12.3	MYH9	myosin heavy chain 9	4627	1.83579	2.99108e-11	1.51648e-09
ILMN_1717793	19	19q13.2	C19orf33	chromosome 19 open reading frame 33	64073	1.8347	6.5311e-08	9.28903e-07
ILMN_1836776	17	17p11.2	MPRIP	myosin phosphatase Rho interacting protein	23164	1.83197	2.12131e-07	2.5425e-06
ILMN_2148847	6	6q15	AKIRIN2	akirin 2	55122	1.83115	3.16163e-09	7.22013e-08
ILMN_2214678	2	2p13.3	MXD1	MAX dimerization protein 1	4084	1.82901	7.35596e-08	1.02632e-06
ILMN_1697916	11	11p11.2	LARGE2	LARGE xylosyl- and glucuronyltransferase 2	120071	1.82793	3.70847e-10	1.17837e-08
ILMN_1774287	6	6p21.33	CFB	complement factor B	629	1.82531	6.63615e-09	1.34899e-07
ILMN_1749150	4	4q32.1	RXFP1	relaxin family peptide receptor 1	59350	1.81499	1.30307e-08	2.39981e-07
ILMN_2367681	8	8q22.2	SPAG1	sperm associated antigen 1	6674	1.81379	8.18847e-11	3.41361e-09
ILMN_1742450	6	6p21.32	TAPBP	TAP binding protein	6892	1.81268	9.33715e-09	1.78838e-07
ILMN_1683755	1	1q32.1	SOX13	SRY-box transcription factor 13	9580	1.80963	3.34505e-09	7.56491e-08
ILMN_2124802	16	16q13	MT1H	metallothionein 1H	4496	1.80873	1.24818e-05	8.85438e-05
ILMN_1735743	2	2q13-q14.1	FBLN7	fibulin 7	129804	1.80668	5.93555e-10	1.7535e-08
ILMN_1702124	13	13q12.2	LNX2	ligand of numb-protein X 2	222484	1.80646	3.28083e-10	1.06435e-08
ILMN_1728498	3	3p21.2	PCBP4	poly(rC) binding protein 4	57060	1.80538	1.95436e-08	3.35084e-07
ILMN_1717809	20	20p13	RNF24	ring finger protein 24	11237	1.79836	1.74173e-07	2.1569e-06
ILMN_1811921	1	1q32.1	CSRP1	cysteine and glycine rich protein 1	1465	1.79825	1.77373e-10	6.3238e-09
ILMN_1678095	1	1p35.3	SMPDL3B	sphingomyelin phosphodiesterase acid like 3B	27293	1.79647	5.33593e-08	7.8049e-07
ILMN_1724789	11	11p13	CD59	CD59 molecule (CD59 blood group)	966	1.79646	2.12343e-08	3.59035e-07
ILMN_1780898	14	14q23.1	PRKCH	protein kinase C eta	5583	1.79616	5.22736e-11	2.35888e-09
ILMN_1693192	20	20q13.12	PI3	peptidase inhibitor 3	5266	1.79616	2.92845e-08	4.72665e-07
ILMN_3244176	11	11q24.1	MIR100HG	mir-100-let-7a-2-mir-125b-1 cluster host gene	399959	1.79574	1.21476e-08	2.25161e-07
ILMN_1726352	15	15q23	THSD4	thrombospondin type 1 domain containing 4	79875	1.79551	8.18673e-09	1.59765e-07
ILMN_1720311	5	5q22.1	SLC25A46	solute carrier family 25 member 46	91137	1.79031	3.96024e-09	8.70193e-08
ILMN_1704500	19	19p13.3	STAP2	signal transducing adaptor family member 2	55620	1.78986	1.77122e-09	4.42818e-08
ILMN_1728009	5	5q13.2	TMEM171	transmembrane protein 171	134285	1.78732	1.40902e-07	1.80478e-06
ILMN_1739001	1	1p32.1	TACSTD2	tumor associated calcium signal transducer 2	4070	1.78406	1.77035e-09	4.42818e-08
ILMN_2041222	17	17q11.2	KRT18P55	keratin 18 pseudogene 55	284085	1.78372	3.70444e-11	1.78123e-09
ILMN_1789074	6	6p21.33	HSPA1A	heat shock protein family A (Hsp70) member 1A	3303	1.78001	2.92914e-10	9.71944e-09
ILMN_1681890	X	Xp11.4	DYNLT3	dynein light chain Tctex-type 3	6990	1.77896	6.14495e-09	1.2648e-07
ILMN_1703330	5	5q22.3	FEM1C	fem-1 homolog C	56929	1.77878	3.30146e-09	7.49316e-08
ILMN_1740571	5	5q13.2	OCLN	occludin	100506658	1.77637	2.43911e-08	4.04282e-07
ILMN_1777061	5	5q12.1	ZSWIM6	zinc finger SWIM-type containing 6	57688	1.77613	8.46651e-08	1.15784e-06
ILMN_1719498	1	1p22.1	EPHX4	epoxide hydrolase 4	253152	1.77547	2.87645e-08	4.66456e-07
ILMN_1682037	16	16q22.1	FBXL8	F-box and leucine rich repeat protein 8	55336	1.77166	4.84648e-08	7.20184e-07
ILMN_1703913	6	6p12.1	DST	dystonin	667	1.77159	2.92759e-08	4.72665e-07
ILMN_2298511	16	16p11.2	BOLA2	bolA family member 2	552900	1.76976	5.41445e-08	7.88963e-07
ILMN_1809086	3	3q23	XRN1	5'-3' exoribonuclease 1	54464	1.76897	7.8959e-10	2.24418e-08
ILMN_1764177	6	6p22.3	JARID2	jumonji and AT-rich interaction domain containing 2	3720	1.76661	3.99944e-09	8.77688e-08
ILMN_1709725	19	19q13.2	ACP7	acid phosphatase 7, tartrate resistant (putative)	390928	1.76532	8.7462e-09	1.69021e-07
ILMN_1761101	5	5q22.3	CCDC112	coiled-coil domain containing 112	153733	1.76406	9.56154e-08	1.28616e-06
ILMN_1683133	3	3q21.3	KLF15	Kruppel like factor 15	28999	1.76307	4.62115e-07	4.96011e-06
ILMN_1727248	14	14q32.33	INF2	inverted formin 2	64423	1.76301	9.28671e-08	1.25409e-06
ILMN_1703244	16	16q24.2	MAP1LC3B	microtubule associated protein 1 light chain 3 beta	81631	1.75941	9.06671e-10	2.52287e-08
ILMN_1669617	7	7p12.1	GRB10	growth factor receptor bound protein 10	2887	1.75891	5.36582e-08	7.83864e-07
ILMN_1673069	19	19p13.3	DPP9	dipeptidyl peptidase 9	91039	1.7586	1.90769e-08	3.28683e-07
ILMN_2342033	1	1q23.3	F11R	F11 receptor	50848	1.75481	1.19344e-08	2.21686e-07
ILMN_1725312	5	5q14.3	RASA1	RAS p21 protein activator 1	5921	1.75214	1.51192e-09	3.87833e-08
ILMN_1849013	5	5q11.2	IL6ST	interleukin 6 signal transducer	3572	1.75185	2.27599e-09	5.49875e-08
ILMN_1655191	1	1p36.22	CASZ1	castor zinc finger 1	54897	1.75134	1.13388e-09	3.06601e-08
ILMN_1804117	11	11q13.1	FAM89B	family with sequence similarity 89 member B	23625	1.75009	3.52602e-09	7.89371e-08
ILMN_1727479	1	1p36.32	TPRG1L	tumor protein p63 regulated 1 like	127262	1.74936	2.22288e-10	7.75667e-09
ILMN_1681016	16	16p11.2	SPNS1	sphingolipid transporter 1 (putative)	83985	1.74779	7.5121e-09	1.4979e-07
ILMN_1655595	2	2q36.1	SERPINE2	serpin family E member 2	5270	1.74721	9.02644e-10	2.5137e-08
ILMN_1669881	7	7p21.1	TSPAN13	tetraspanin 13	27075	1.7463	1.32928e-10	5.04716e-09
ILMN_1738277	6	6q25.3	NOX3	NADPH oxidase 3	50508	1.74605	1.42537e-08	2.56896e-07
ILMN_1665243	7	7p14.3	FKBP14	FKBP prolyl isomerase 14	55033	1.74257	2.90075e-07	3.33061e-06
ILMN_1763390	5	5q11.1	ISL1	ISL LIM homeobox 1	3670	1.74039	4.74604e-09	1.01378e-07
ILMN_1751571	19	19p13.13	RAD23A	RAD23 homolog A, nucleotide excision repair protein	5886	1.7397	6.50863e-10	1.8952e-08
ILMN_1808163	11	11q13.2	C11orf24	chromosome 11 open reading frame 24	53838	1.73874	2.37424e-09	5.68039e-08
ILMN_1686679	9	9q31.2	ZNF462	zinc finger protein 462	58499	1.73516	7.49524e-05	0.000429041
ILMN_1851547	X	Xp11.22	FAM120C	family with sequence similarity 120C	54954	1.73487	7.46511e-09	1.49112e-07
ILMN_2081883	16	16p12.3	IQCK	IQ motif containing K	124152	1.73402	7.93344e-09	1.55773e-07
ILMN_1795338	22	22q11.21-q11.22	YPEL1	yippee like 1	29799	1.73314	1.57051e-07	1.97532e-06
ILMN_1778333	20	20q11.22	MMP24	matrix metallopeptidase 24	10893	1.73247	1.62915e-07	2.04093e-06
ILMN_1738821	9	9q34.11	GOLGA2	golgin A2	2801	1.73213	1.24017e-07	1.61344e-06
ILMN_2408576	9	9q34.11	NIBAN2	niban apoptosis regulator 2	64855	1.72809	1.07123e-08	2.01703e-07
ILMN_2047430	10	10q23.32-q23.33	MARCHF5	membrane associated ring-CH-type finger 5	54708	1.72712	2.4914e-09	5.89928e-08
ILMN_1799062	10	10q24.32	NFKB2	nuclear factor kappa B subunit 2	4791	1.72676	7.92935e-09	1.55773e-07
ILMN_2251375	20	20q13.2	ZFP64	ZFP64 zinc finger protein	55734	1.7233	5.53843e-09	1.15863e-07
ILMN_1756071	15	15q26.1	MFGE8	milk fat globule EGF and factor V/VIII domain containing	4240	1.72305	7.89362e-10	2.24418e-08
ILMN_1754842	20	20q11.23	DLGAP4	DLG associated protein 4	22839	1.7198	5.02506e-08	7.42899e-07
ILMN_1707342	3	3p14.1	LRIG1	leucine rich repeats and immunoglobulin like domains 1	26018	1.71874	1.11576e-09	3.02174e-08
ILMN_3247556	8	8q24.3	MROH6	maestro heat like repeat family member 6	642475	1.71608	4.8192e-07	5.14068e-06
ILMN_1739840	9	9q34.11	LRRC8A	leucine rich repeat containing 8 VRAC subunit A	56262	1.71364	7.70794e-11	3.2566e-09
ILMN_1668514	19	19p13.3	PIP5K1C	phosphatidylinositol-4-phosphate 5-kinase type 1 gamma	23396	1.71295	2.23917e-08	3.75474e-07
ILMN_1704369	12	12q13.12	LIMA1	LIM domain and actin binding 1	51474	1.71008	2.41025e-08	4.00075e-07
ILMN_2336728	X	Xq13.1	DLG3	discs large MAGUK scaffold protein 3	1741	1.70772	4.19118e-08	6.39926e-07
ILMN_1702775	11	11q13.2	LRP5	LDL receptor related protein 5	4041	1.70635	5.58466e-10	1.6541e-08
ILMN_1755419	X	Xp22.12	EIF1AX	eukaryotic translation initiation factor 1A X-linked	1964	1.70389	4.21644e-08	6.42644e-07
ILMN_1715647	1	1q23.2	VANGL2	VANGL planar cell polarity protein 2	57216	1.70273	2.19516e-11	1.15896e-09
ILMN_1805175	2	2p13.3	TGFA	transforming growth factor alpha	7039	1.70117	3.2802e-10	1.06435e-08
ILMN_1730995	10	10q25.3	AFAP1L2	actin filament associated protein 1 like 2	84632	1.69991	2.82888e-08	4.59824e-07
ILMN_1702609	3	3q27.1	B3GNT5	UDP-GlcNAc:betaGal beta-1,3-N-acetylglucosaminyltransferase 5	84002	1.69854	2.13273e-07	2.55217e-06
ILMN_1709043	9	9p24.1	PLGRKT	plasminogen receptor with a C-terminal lysine	55848	1.69742	3.62196e-08	5.67336e-07
ILMN_1738816	13	13q14.11	FOXO1	forkhead box O1	2308	1.69741	3.66795e-09	8.17428e-08
ILMN_2133187	16	16p11.2	PRSS53	serine protease 53	339105	1.69728	1.97794e-07	2.39184e-06
ILMN_2408796	19	19p13.3	MFSD12	major facilitator superfamily domain containing 12	126321	1.69716	2.25627e-07	2.68324e-06
ILMN_1721113	6	6p21.33	HLA-C	major histocompatibility complex, class I, C	3107	1.69654	5.68754e-08	8.23535e-07
ILMN_1734483	1	1p35.1	BSDC1	BSD domain containing 1	55108	1.69621	2.57587e-09	6.08259e-08
ILMN_1791147	16	16p11.2	YPEL3	yippee like 3	83719	1.69604	5.67657e-09	1.18322e-07
ILMN_1665964	11	11q14.1	GAB2	GRB2 associated binding protein 2	9846	1.69506	5.5878e-09	1.16684e-07
ILMN_3310643	5	5q31.1	VTRNA2-1	vault RNA 2-1	100126299	1.69293	2.13271e-08	3.60251e-07
ILMN_1773742	7	c("7q31.1", "14q24.2-q24.3")	DNAJB9	DnaJ heat shock protein family (Hsp40) member B9	4189	1.69125	5.07541e-10	1.53727e-08
ILMN_1728349	6	6p21.1	TMEM63B	transmembrane protein 63B	55362	1.69065	1.05686e-07	1.40518e-06
ILMN_2076600	X	Xq21.1	ITM2A	integral membrane protein 2A	9452	1.68638	1.03773e-09	2.83719e-08
ILMN_1697220	6	6q14.3	NT5E	5'-nucleotidase ecto	4907	1.6844	4.49428e-08	6.78095e-07
ILMN_3276971	1	1p36.33	DVL1	dishevelled segment polarity protein 1	1855	1.68426	1.98032e-08	3.37987e-07
ILMN_2054233	6	6q14.1	SENP6	SUMO specific peptidase 6	26054	1.68295	3.55692e-08	5.59054e-07
ILMN_1690625	20	20q13.13	SLC9A8	solute carrier family 9 member A8	23315	1.67919	2.15434e-09	5.23786e-08
ILMN_1751400	17	17q21.32	SKAP1	src kinase associated phosphoprotein 1	8631	1.67846	7.76424e-06	5.81913e-05
ILMN_1673548	2	2p14	LGALSL	galectin like	29094	1.6781	1.95283e-08	3.35084e-07
ILMN_1674908	17	17q21.32	HOXB5	homeobox B5	3215	1.67453	1.24504e-08	2.30155e-07
ILMN_1745798	13	13q14.12-q14.13	GTF2F2	general transcription factor IIF subunit 2	2963	1.67416	2.41289e-10	8.31036e-09
ILMN_1740900	14	14q22.2	BMP4	bone morphogenetic protein 4	652	1.67319	3.60862e-06	2.99353e-05
ILMN_1738992	1	1q23.1	MNDA	myeloid cell nuclear differentiation antigen	4332	1.67283	2.53469e-07	2.97029e-06
ILMN_1761463	1	1p36.21	EFHD2	EF-hand domain family member D2	79180	1.67225	2.79331e-09	6.51131e-08
ILMN_1733703	22	22q13.31	TRMU	tRNA mitochondrial 2-thiouridylase	55687	1.67125	6.94479e-07	7.08159e-06
ILMN_1786444	8	8p21.3	LPL	lipoprotein lipase	4023	1.67066	1.38679e-06	1.28766e-05
ILMN_1806023	1	1p32.1	JUN	Jun proto-oncogene, AP-1 transcription factor subunit	3725	1.67003	4.65948e-08	6.97525e-07
ILMN_1759595	22	22q11.21	RTL10	retrotransposon Gag like 10	79680	1.66998	1.58518e-08	2.81058e-07
ILMN_2363658	2	2p25.3	PXDN	peroxidasin	7837	1.66927	7.5436e-07	7.62901e-06
ILMN_1769787	22	22q13.33	SELENOO	selenoprotein O	83642	1.66661	4.23737e-08	6.45549e-07
ILMN_2387865	4	4p15.31-p15.2	KCNIP4	potassium voltage-gated channel interacting protein 4	80333	1.66644	3.35997e-07	3.77816e-06
ILMN_2311537	6	6p21.31	HMGA1	high mobility group AT-hook 1	3159	1.66354	9.51059e-10	2.6252e-08
ILMN_1806607	1	1p36.11	SFN	stratifin	2810	1.6624	7.59669e-07	7.6782e-06
ILMN_2380237	17	17q25.3	C1QTNF1	C1q and TNF related 1	114897	1.6622	3.36745e-09	7.60788e-08
ILMN_1692785	1	1p36.31	KLHL21	kelch like family member 21	9903	1.65871	3.82679e-08	5.92955e-07
ILMN_1664922	3	3p14.3	FLNB	filamin B	2317	1.65863	2.04408e-10	7.18365e-09
ILMN_2367469	11	11p15.4	CARS1	cysteinyl-tRNA synthetase 1	833	1.65661	2.68717e-07	3.12349e-06
ILMN_1808789	15	15q21.2	MYO5C	myosin VC	55930	1.65509	1.6076e-08	2.8437e-07
ILMN_1778255	19	19p13.13	FARSA	phenylalanyl-tRNA synthetase subunit alpha	2193	1.654	8.57931e-09	1.66356e-07
ILMN_1784946	6	6q15	ORC3	origin recognition complex subunit 3	23595	1.65299	1.24438e-10	4.80957e-09
ILMN_1800739	19	19q13.2	SPINT2	serine peptidase inhibitor, Kunitz type 2	10653	1.65253	1.31898e-09	3.46329e-08
ILMN_1805410	15	15q21.1	C15orf48	chromosome 15 open reading frame 48	84419	1.65214	2.13638e-09	5.19806e-08
ILMN_1801476	4	4q21.23	CDS1	CDP-diacylglycerol synthase 1	1040	1.64999	1.45842e-07	1.85674e-06
ILMN_1769290	9	9p22.3	TTC39B	tetratricopeptide repeat domain 39B	158219	1.6493	4.65724e-09	9.96667e-08
ILMN_1760412	13	13q12.13	SHISA2	shisa family member 2	387914	1.64734	4.52438e-08	6.81444e-07
ILMN_1736834	3	3q26.2	SKIL	SKI like proto-oncogene	6498	1.64722	8.97917e-08	1.21972e-06
ILMN_2225577	5	5q13.3	POC5	POC5 centriolar protein	134359	1.64704	1.87951e-07	2.29211e-06
ILMN_1769259	11	11p15.5	ANO9	anoctamin 9	338440	1.64699	7.04752e-08	9.91716e-07
ILMN_1684158	16	16q11.2	GPT2	glutamic--pyruvic transaminase 2	84706	1.6461	3.18344e-10	1.04099e-08
ILMN_1750896	9	9q31.1	STX17	syntaxin 17	55014	1.64334	4.88518e-08	7.25017e-07
ILMN_1767934	9	9q21.13	PCSK5	proprotein convertase subtilisin/kexin type 5	5125	1.6426	2.40846e-05	0.000158251
ILMN_1781373	2	2q24.2	IFIH1	interferon induced with helicase C domain 1	64135	1.63903	1.46973e-07	1.86701e-06
ILMN_1759117	X	Xp21.1	XK	X-linked Kx blood group	7504	1.63885	6.08854e-07	6.30924e-06
ILMN_1678422	17	17q21.2	DHX58	DExH-box helicase 58	79132	1.6368	2.41763e-09	5.76419e-08
ILMN_1709132	18	18q12.2	ELP2	elongator acetyltransferase complex subunit 2	55250	1.6357	2.59153e-09	6.10664e-08
ILMN_1724686	3	3q28	CLDN1	claudin 1	9076	1.63484	1.21961e-09	3.2494e-08
ILMN_1804938	3	3q21.3	TPRA1	transmembrane protein adipocyte associated 1	131601	1.63328	1.67906e-07	2.09358e-06
ILMN_1694268	2	2q37.3	HES6	hes family bHLH transcription factor 6	55502	1.63195	4.83149e-08	7.18286e-07
ILMN_1751079	6	6p21.32	TAP1	transporter 1, ATP binding cassette subfamily B member	6890	1.63077	3.10963e-09	7.11532e-08
ILMN_1742881	12	12q21.2	SYT1	synaptotagmin 1	6857	1.63038	3.51135e-07	3.92152e-06
ILMN_1688103	1	1p36.22	CTNNBIP1	catenin beta interacting protein 1	56998	1.62942	1.06381e-08	2.00524e-07
ILMN_1655796	5	5q23.2	MARCHF3	membrane associated ring-CH-type finger 3	115123	1.62843	1.09985e-09	2.98569e-08
ILMN_1801767	18	18q11.2	ABHD3	abhydrolase domain containing 3, phospholipase	171586	1.62739	3.59558e-07	3.99617e-06
ILMN_2324421	12	12q23.3	TXNRD1	thioredoxin reductase 1	7296	1.6258	2.4904e-09	5.89928e-08
ILMN_1694798	5	5p12	TMEM267	transmembrane protein 267	64417	1.62307	3.34288e-07	3.76218e-06
ILMN_1693004	20	20q11.23	SOGA1	suppressor of glucose, autophagy associated 1	140710	1.62305	7.09936e-09	1.4255e-07
ILMN_1797786	22	22q13.33	MAPK12	mitogen-activated protein kinase 12	6300	1.62272	3.33731e-09	7.55961e-08
ILMN_1693726	22	22q12.2	TBC1D10A	TBC1 domain family member 10A	83874	1.62138	8.39765e-06	6.24229e-05
ILMN_2132982	2	2q35	IGFBP5	insulin like growth factor binding protein 5	3488	1.62068	3.50918e-08	5.52447e-07
ILMN_1780591	11	11q14.3	FAT3	FAT atypical cadherin 3	120114	1.62047	5.55858e-08	8.06896e-07
ILMN_1755383	6	6p12.1	LRRC1	leucine rich repeat containing 1	55227	1.61949	6.08792e-08	8.73075e-07
ILMN_2380494	10	10q22.3	ANXA11	annexin A11	311	1.61938	7.91666e-09	1.55696e-07
ILMN_3234775	4	4p11	SLAIN2	SLAIN motif family member 2	57606	1.61881	8.53284e-06	6.33053e-05
ILMN_1810593	1	1p31.1	LRRC7	leucine rich repeat containing 7	57554	1.61862	1.00795e-06	9.75847e-06
ILMN_1766221	9	9p21.1	B4GALT1	beta-1,4-galactosyltransferase 1	2683	1.61821	2.0596e-07	2.48015e-06
ILMN_1658231	19	19p13.13	NACC1	nucleus accumbens associated 1	112939	1.61536	6.81183e-08	9.61297e-07
ILMN_1706990	18	18q12.2	ZNF271P	zinc finger protein 271, pseudogene	10778	1.61503	1.3332e-07	1.72341e-06
ILMN_2275098	7	7q11.23	DTX2	deltex E3 ubiquitin ligase 2	113878	1.61407	5.09327e-09	1.07926e-07
ILMN_2089329	13	13q31.1	SPRY2	sprouty RTK signaling antagonist 2	10253	1.61047	3.99247e-08	6.14759e-07
ILMN_1657983	16	16q23.1	TERF2IP	TERF2 interacting protein	54386	1.61018	2.26356e-09	5.47254e-08
ILMN_1798224	X	Xp11.22	KDM5C	lysine demethylase 5C	8242	1.60756	1.20809e-05	8.60184e-05
ILMN_2086077	19	19p13.13	JUNB	JunB proto-oncogene, AP-1 transcription factor subunit	3726	1.6073	1.35963e-07	1.75232e-06
ILMN_1811392	19	19p13.3	ARHGAP45	Rho GTPase activating protein 45	23526	1.60631	9.73805e-07	9.47317e-06
ILMN_1668960	X	Xp11.4	MID1IP1	MID1 interacting protein 1	58526	1.60548	7.08241e-08	9.95812e-07
ILMN_2159453	19	19p13.2	STXBP2	syntaxin binding protein 2	6813	1.60533	1.81928e-09	4.53518e-08
ILMN_1728107	19	19p13.3	GNG7	G protein subunit gamma 7	2788	1.6047	1.72759e-07	2.14324e-06
ILMN_2326282	19	19p13.3	TMEM259	transmembrane protein 259	91304	1.60247	1.32148e-08	2.42594e-07
ILMN_1702691	6	6q23.3	TNFAIP3	TNF alpha induced protein 3	7128	1.60153	8.78735e-07	8.6806e-06
ILMN_1680738	5	5q22.1	NREP	neuronal regeneration related protein	9315	1.60126	4.31747e-09	9.34982e-08
ILMN_2053415	19	19p13.2	LDLR	low density lipoprotein receptor	3949	1.60009	2.3603e-10	8.17005e-09
ILMN_1752810	15	15q23	LARP6	La ribonucleoprotein 6, translational regulator	55323	1.59934	2.1191e-08	3.58593e-07
ILMN_1722662	9	9q31.2	RAD23B	RAD23 homolog B, nucleotide excision repair protein	5887	1.59792	2.79763e-08	4.5634e-07
ILMN_1786707	19	19q13.33	EMC10	ER membrane protein complex subunit 10	284361	1.59733	1.85135e-07	2.26845e-06
ILMN_1806275	19	19p13.3	ADAT3	adenosine deaminase tRNA specific 3	113179	1.59642	7.89157e-09	1.5538e-07
ILMN_1794442	16	16q24.2	ZNF469	zinc finger protein 469	84627	1.59534	1.33776e-08	2.44931e-07
ILMN_2375002	2	2q11.2	MAP4K4	mitogen-activated protein kinase kinase kinase kinase 4	9448	1.5939	2.02749e-08	3.44334e-07
ILMN_1763104	17	17q11.2	TRAF4	TNF receptor associated factor 4	9618	1.59284	5.77596e-07	6.01426e-06
ILMN_1710326	3	3q11.2	CLDND1	claudin domain containing 1	56650	1.59241	1.06803e-10	4.22747e-09
ILMN_1812096	19	19q13.31	CADM4	cell adhesion molecule 4	199731	1.59034	2.92131e-07	3.35047e-06
ILMN_1681777	X	Xp22.2	SHROOM2	shroom family member 2	357	1.58905	4.09123e-09	8.94414e-08
ILMN_2371055	1	1q22	EFNA1	ephrin A1	1942	1.58811	1.46442e-09	3.78183e-08
ILMN_2400512	19	19p13.2	PRKCSH	protein kinase C substrate 80K-H	5589	1.58531	5.81745e-07	6.0538e-06
ILMN_1739238	X	Xq28	L1CAM	L1 cell adhesion molecule	3897	1.58303	1.00202e-06	9.70654e-06
ILMN_1764166	6	6q14.1	BCKDHB	branched chain keto acid dehydrogenase E1 subunit beta	594	1.58246	2.00715e-08	3.41552e-07
ILMN_2064917	5	5q13.3	AGGF1	angiogenic factor with G-patch and FHA domains 1	55109	1.58233	7.52723e-09	1.50005e-07
ILMN_1712894	19	19q13.33	FUT1	fucosyltransferase 1 (H blood group)	2523	1.58131	7.94656e-06	5.94028e-05
ILMN_2408683	1	1p32.2	PLPP3	phospholipid phosphatase 3	8613	1.58111	4.28952e-08	6.5234e-07
ILMN_2148785	1	1p22.2	GBP1	guanylate binding protein 1	2633	1.57882	6.5947e-09	1.34214e-07
ILMN_1716057	1	1q41	CAPN2	calpain 2	824	1.57509	3.45636e-08	5.45362e-07
ILMN_1770425	16	16p11.2	CDIPT	CDP-diacylglycerol--inositol 3-phosphatidyltransferase	10423	1.57384	2.11386e-07	2.53664e-06
ILMN_2186482	5	5q22.3	TMED7	transmembrane p24 trafficking protein 7	51014	1.57201	1.04834e-08	1.98042e-07
ILMN_1789751	3	3q25.32	MFSD1	major facilitator superfamily domain containing 1	64747	1.57197	4.25125e-09	9.2296e-08
ILMN_3304219	12	12q13.3	RBMS2	RNA binding motif single stranded interacting protein 2	5939	1.57054	4.2442e-09	9.22592e-08
ILMN_1720513	18	18q12.3	SETBP1	SET binding protein 1	26040	1.56944	1.38206e-07	1.77526e-06
ILMN_1675472	20	20q11.23	NORAD	non-coding RNA activated by DNA damage	647979	1.56927	1.40393e-07	1.80067e-06
ILMN_1757467	22	22q13.1	H1-0	H1.0 linker histone	3005	1.56923	6.42102e-08	9.14001e-07
ILMN_3273641	6	6p21.32	ATF6B	activating transcription factor 6 beta	1388	1.56916	3.21472e-06	2.70913e-05
ILMN_1739241	15	15q15.1	CHAC1	ChaC glutathione specific gamma-glutamylcyclotransferase 1	79094	1.56797	7.16696e-07	7.28014e-06
ILMN_1657435	16	16q13	MT1M	metallothionein 1M	4499	1.56635	4.74748e-07	5.08294e-06
ILMN_2205032	X	Xq13.3	MAGEE1	MAGE family member E1	57692	1.56569	6.26717e-09	1.28535e-07
ILMN_1722156	6	6q14.1	RWDD2A	RWD domain containing 2A	112611	1.56501	4.53673e-10	1.3903e-08
ILMN_1791186	6	6q22.33	ARHGAP18	Rho GTPase activating protein 18	93663	1.56465	2.1407e-07	2.55994e-06
ILMN_1798164	6	6q12	PHF3	PHD finger protein 3	23469	1.56388	4.5469e-08	6.83939e-07
ILMN_1802397	19	19p13.3	GNA11	G protein subunit alpha 11	2767	1.56291	0.000226765	0.00114835
ILMN_1725188	3	3q26.2	PRKCI	protein kinase C iota	5584	1.56062	7.24723e-07	7.35085e-06
ILMN_2367070	X	Xp22.11	ACOT9	acyl-CoA thioesterase 9	23597	1.56036	1.06629e-08	2.00883e-07
ILMN_2334210	17	17q25.1	ITGB4	integrin subunit beta 4	3691	1.56003	6.27812e-09	1.28683e-07
ILMN_1762718	16	16q21-q22.1	CMTM4	CKLF like MARVEL transmembrane domain containing 4	146223	1.5592	5.35499e-08	7.82782e-07
ILMN_1706817	3	3q25.1	SERP1	stress associated endoplasmic reticulum protein 1	27230	1.55911	6.7349e-09	1.36504e-07
ILMN_1728224	20	20q13.33	OGFR	opioid growth factor receptor	11054	1.55745	4.28458e-08	6.51876e-07
ILMN_1653404	17	17q21.2	NKIRAS2	NFKB inhibitor interacting Ras like 2	28511	1.55685	1.16101e-09	3.11957e-08
ILMN_1727080	6	6q14.1	MYO6	myosin VI	4646	1.55683	8.69086e-09	1.68235e-07
ILMN_1678671	3	3q27.1	KLHL24	kelch like family member 24	54800	1.5556	5.69778e-09	1.18621e-07
ILMN_1815264	22	22q12.2	RHBDD3	rhomboid domain containing 3	25807	1.55524	1.67146e-07	2.08711e-06
ILMN_1720476	9	9q22.31	PHF2	PHD finger protein 2	5253	1.55514	1.70318e-09	4.27046e-08
ILMN_2334760	X	Xq22.1	ARMCX3	armadillo repeat containing X-linked 3	51566	1.55317	8.30689e-06	6.17882e-05
ILMN_1768271	6	6q13	SMAP1	small ArfGAP 1	60682	1.55286	1.2104e-09	3.22984e-08
ILMN_2192032	5	5q22.2	SRP19	signal recognition particle 19	6728	1.55201	1.3616e-09	3.56165e-08
ILMN_1782305	2	2q24.1	NR4A2	nuclear receptor subfamily 4 group A member 2	4929	1.55188	5.7151e-09	1.18838e-07
ILMN_1651719	16	16q23.3-q24.1	MBTPS1	membrane bound transcription factor peptidase, site 1	8720	1.55142	5.33302e-10	1.59602e-08
ILMN_1766359	1	1q21.3	GATAD2B	GATA zinc finger domain containing 2B	57459	1.55099	9.63539e-07	9.39185e-06
ILMN_1722218	19	19q13.42	MBOAT7	membrane bound O-acyltransferase domain containing 7	79143	1.55094	4.08649e-09	8.93946e-08
ILMN_1705064	17	17p13.1	NDEL1	nudE neurodevelopment protein 1 like 1	81565	1.55024	3.13745e-08	5.01934e-07
ILMN_1803211	1	1p36.22	FBXO2	F-box protein 2	26232	1.5498	2.56028e-05	0.000166733
ILMN_1726809	12	12p12.1	BHLHE41	basic helix-loop-helix family member e41	79365	1.54862	3.2965e-08	5.24216e-07
ILMN_1774375	19	19p13.3	SMIM24	small integral membrane protein 24	284422	1.54534	4.45916e-07	4.8072e-06
ILMN_1712231	2	2p25.3	SH3YL1	SH3 and SYLF domain containing 1	26751	1.5452	6.47186e-06	4.97046e-05
ILMN_1660995	19	19p13.3	AMH	anti-Mullerian hormone	268	1.54335	1.89461e-06	1.68957e-05
ILMN_1670640	12	12q24.31	ZNF664	zinc finger protein 664	144348	1.5407	3.01371e-07	3.44283e-06
ILMN_2215211	2	2q11.1	ZNF514	zinc finger protein 514	84874	1.53936	2.23913e-08	3.75474e-07
ILMN_3251516	16	16q24.1	MEAK7	MTOR associated protein, eak-7 homolog	57707	1.53897	1.84104e-07	2.25964e-06
ILMN_1688480	11	11q13.3	CCND1	cyclin D1	595	1.53874	7.55607e-09	1.50406e-07
ILMN_1726181	19	19p13.2	TIMM29	translocase of inner mitochondrial membrane 29	90580	1.53805	6.90275e-09	1.39332e-07
ILMN_1810891	16	16p11.2	ZNF629	zinc finger protein 629	23361	1.53707	1.29291e-07	1.67573e-06
ILMN_1788689	6	6q14.1	PHIP	pleckstrin homology domain interacting protein	55023	1.53659	3.13749e-09	7.17296e-08
ILMN_2321634	5	5q13.2	RAD17	RAD17 checkpoint clamp loader component	5884	1.53385	1.47757e-08	2.64216e-07
ILMN_2311761	5	5q22.3-q23.1	AP3S1	adaptor related protein complex 3 subunit sigma 1	1176	1.53294	2.16306e-08	3.64307e-07
ILMN_1716728	6	6p21.2	SAYSD1	SAYSVFN motif domain containing 1	55776	1.52939	7.27432e-09	1.45723e-07
ILMN_1706645	6	6q13	CGAS	cyclic GMP-AMP synthase	115004	1.52787	2.1217e-07	2.5425e-06
ILMN_3238676	6	6q25.1	ULBP2	UL16 binding protein 2	80328	1.52753	2.37227e-09	5.6796e-08
ILMN_1686668	5	5q13.3	GFM2	GTP dependent ribosome recycling factor mitochondrial 2	84340	1.52673	1.3245e-06	1.23883e-05
ILMN_1781966	22	22q12.2	OSBP2	oxysterol binding protein 2	23762	1.52555	3.55687e-07	3.96722e-06
ILMN_2106227	9	9p24.1	KIAA2026	KIAA2026	158358	1.52474	2.86161e-06	2.44079e-05
ILMN_1694514	5	5p15.33	ZDHHC11	zinc finger DHHC-type containing 11	79844	1.52409	1.3449e-07	1.73658e-06
ILMN_1685547	X	Xp11.21	ZXDB	zinc finger X-linked duplicated B	158586	1.52217	1.05442e-07	1.40302e-06
ILMN_1815719	16	16q23.3	PLCG2	phospholipase C gamma 2	5336	1.51546	1.79385e-08	3.12648e-07
ILMN_2162358	16	16p13.3	ZNF597	zinc finger protein 597	146434	1.51545	5.03792e-10	1.52829e-08
ILMN_2184184	9	9q21.13	ANXA1	annexin A1	301	1.51474	2.99685e-09	6.88386e-08
ILMN_1656670	6	6p22.1	HLA-G	major histocompatibility complex, class I, G	3135	1.51409	3.65728e-09	8.15579e-08
ILMN_2198893	7	7q32.1	LOC407835	mitogen-activated protein kinase kinase 2 pseudogene	407835	1.51395	1.57769e-08	2.80373e-07
ILMN_1727642	2	2p13.1	MOGS	mannosyl-oligosaccharide glucosidase	7841	1.5132	1.08096e-06	1.03953e-05
ILMN_1651347	2	2p14	SERTAD2	SERTA domain containing 2	9792	1.51094	3.1762e-08	5.06956e-07
ILMN_2082209	20	20q13.12	TOX2	TOX high mobility group box family member 2	84969	1.51084	1.67647e-08	2.95038e-07
ILMN_1684210	1	1p36.11	NIPAL3	NIPA like domain containing 3	57185	1.50848	2.72441e-07	3.15297e-06
ILMN_1706273	11	11p15.5	MOB2	MOB kinase activator 2	81532	1.50815	2.50069e-08	4.12901e-07
ILMN_1812934	20	20q13.33	DIDO1	death inducer-obliterator 1	11083	1.50792	2.07624e-07	2.49757e-06
ILMN_1764483	19	19q13.31	PSG2	pregnancy specific beta-1-glycoprotein 2	5670	1.50691	6.7417e-07	6.88876e-06
ILMN_2401964	22	22q13.1	CDC42EP1	CDC42 effector protein 1	11135	1.50669	2.84773e-07	3.27917e-06
ILMN_1713301	22	22q11.21	DGCR2	DiGeorge syndrome critical region gene 2	9993	1.5065	2.27943e-07	2.70426e-06
ILMN_1672295	1	1p34.3	ZC3H12A	zinc finger CCCH-type containing 12A	80149	1.50229	2.35506e-08	3.91858e-07
ILMN_1753254	5	5p15.33	SLC12A7	solute carrier family 12 member 7	10723	1.50126	1.52176e-07	1.92106e-06
ILMN_1676946	8	8p11.21	AP3M2	adaptor related protein complex 3 subunit mu 2	10947	1.5009	3.18608e-08	5.08063e-07
ILMN_1702487	6	6q23.2	SGK1	serum/glucocorticoid regulated kinase 1	6446	1.49907	6.62866e-08	9.40064e-07
ILMN_3252665	6	6p21.1	C6orf132	chromosome 6 open reading frame 132	647024	1.499	2.08392e-07	2.50506e-06
ILMN_1797001	9	9p21.1	DDX58	DExD/H-box helicase 58	23586	1.49865	7.19312e-08	1.0085e-06
ILMN_2307025	20	20q11.22	CPNE1	copine 1	8904	1.49802	1.31787e-08	2.42191e-07
ILMN_1699856	9	9q34.13-q34.2	RALGDS	ral guanine nucleotide dissociation stimulator	5900	1.49717	4.02007e-08	6.17904e-07
ILMN_1785179	21	21q22.3	UBE2G2	ubiquitin conjugating enzyme E2 G2	7327	1.49711	5.68578e-07	5.93469e-06
ILMN_1772824	12	12p13.33	WNT5B	Wnt family member 5B	81029	1.49667	1.75763e-08	3.07283e-07
ILMN_3247139	17	17q12	EPOP	elongin BC and polycomb repressive complex 2 associated protein	100170841	1.49629	4.64641e-08	6.96174e-07
ILMN_1728907	5	5q14.1	SCAMP1	secretory carrier membrane protein 1	9522	1.49608	5.68969e-09	1.18524e-07
ILMN_1801905	19	19p13.2	ATG4D	autophagy related 4D cysteine peptidase	84971	1.49581	1.40483e-07	1.80115e-06
ILMN_1780172	20	20q13.33	FNDC11	fibronectin type III domain containing 11	79025	1.49432	4.87671e-09	1.03912e-07
ILMN_2396444	5	5q31.3	CD14	CD14 molecule	929	1.49281	5.77133e-08	8.33915e-07
ILMN_1773380	17	17q25.1	UNC13D	unc-13 homolog D	201294	1.49249	8.4598e-07	8.41732e-06
ILMN_1781374	1	1q21.3	TUFT1	tuftelin 1	7286	1.49183	2.75318e-09	6.43516e-08
ILMN_1815032	8	8p23.1	SOX7	SRY-box transcription factor 7	83595	1.49065	4.01925e-07	4.39757e-06
ILMN_1726266	10	10q26.2	ADAM12	ADAM metallopeptidase domain 12	8038	1.48938	6.9715e-08	9.82221e-07
ILMN_1791820	16	16p11.2	ZNF768	zinc finger protein 768	79724	1.48936	6.29431e-07	6.49319e-06
ILMN_2099301	22	22q13.1	SUN2	Sad1 and UNC84 domain containing 2	25777	1.48859	7.60379e-09	1.51094e-07
ILMN_1767766	19	19p13.13	PRDX2	peroxiredoxin 2	7001	1.48715	1.5481e-08	2.75684e-07
ILMN_1719972	X	Xq28	PLXNA3	plexin A3	55558	1.48621	3.46944e-07	3.87974e-06
ILMN_1766718	5	5q14.3	LYSMD3	LysM domain containing 3	116068	1.48411	1.50762e-07	1.90601e-06
ILMN_1805725	12	12q13.3	B4GALNT1	beta-1,4-N-acetyl-galactosaminyltransferase 1	2583	1.48143	1.89836e-06	1.69204e-05
ILMN_1814797	1	1q42.2	SLC35F3	solute carrier family 35 member F3	148641	1.4796	1.15697e-06	1.10096e-05
ILMN_1764754	2	2q37.3	RAMP1	receptor activity modifying protein 1	10267	1.47878	1.98479e-06	1.75759e-05
ILMN_1779228	18	18q12.1	CDH2	cadherin 2	1000	1.47831	8.8777e-10	2.4823e-08
ILMN_1758214	6	6q15	RARS2	arginyl-tRNA synthetase 2, mitochondrial	57038	1.47729	2.82775e-10	9.465e-09
ILMN_1671791	14	14q11.2-q12	PCK2	phosphoenolpyruvate carboxykinase 2, mitochondrial	5106	1.47325	2.29504e-08	3.83352e-07
ILMN_1889752	6	6p24.2	SMIM13	small integral membrane protein 13	221710	1.47323	2.20561e-08	3.70748e-07
ILMN_1730575	6	6p12.1	GCLC	glutamate-cysteine ligase catalytic subunit	2729	1.47303	7.86311e-09	1.54996e-07
ILMN_3251634	3	3q29	SENP5	SUMO specific peptidase 5	205564	1.47006	3.74069e-09	8.28817e-08
ILMN_1772603	17	17q21.31	MAPK8IP1P2	mitogen-activated protein kinase 8 interacting protein 1 pseudogene 2	644172	1.46884	1.06584e-06	1.0271e-05
ILMN_1801313	3	3q25.1	SIAH2	siah E3 ubiquitin protein ligase 2	6478	1.46846	1.6676e-08	2.9388e-07
ILMN_1679133	6	6p25.2	SERPINB1	serpin family B member 1	1992	1.46818	1.12816e-06	1.07831e-05
ILMN_2333107	19	19p13.3	TLE5	TLE family member 5, transcriptional modulator	166	1.46732	6.26733e-07	6.46985e-06
ILMN_1798014	20	20q11.22	EIF2S2	eukaryotic translation initiation factor 2 subunit beta	8894	1.46722	1.84585e-07	2.26387e-06
ILMN_1684789	16	16p11.2	SGF29	SAGA complex associated factor 29	112869	1.46665	5.81175e-09	1.2063e-07
ILMN_1798885	X	Xp11.23	SLC35A2	solute carrier family 35 member A2	7355	1.46574	7.88104e-09	1.55261e-07
ILMN_1752283	20	20q11.22	ITCH	itchy E3 ubiquitin protein ligase	83737	1.46117	3.25214e-08	5.17401e-07
ILMN_1661804	16	16p11.2	CTF1	cardiotrophin 1	1489	1.46046	2.7276e-07	3.1556e-06
ILMN_1700547	18	18q11.2	CHST9	carbohydrate sulfotransferase 9	83539	1.45744	1.43343e-08	2.57659e-07
ILMN_1654609	5	5q22.1	EPB41L4A-AS1	EPB41L4A antisense RNA 1	114915	1.45641	2.6195e-09	6.16029e-08
ILMN_2228453	1	1p36.32	CEP104	centrosomal protein 104	9731	1.45462	1.61344e-09	4.08108e-08
ILMN_1808650	6	6p12.3	CYP39A1	cytochrome P450 family 39 subfamily A member 1	51302	1.45301	6.75649e-09	1.3678e-07
ILMN_1783161	9	9q33.2	DAB2IP	DAB2 interacting protein	153090	1.45288	6.71663e-09	1.36213e-07
ILMN_1672728	16	16p13.3	KCTD5	potassium channel tetramerization domain containing 5	54442	1.45075	4.51368e-09	9.71978e-08
ILMN_2157099	13	13q13.3	CCNA1	cyclin A1	8900	1.44972	3.72439e-05	0.000231397
ILMN_1668540	1	1p22.3	ZNHIT6	zinc finger HIT-type containing 6	54680	1.44829	7.09832e-09	1.4255e-07
ILMN_1760718	7	7p13	ZMIZ2	zinc finger MIZ-type containing 2	83637	1.44776	3.08006e-08	4.94358e-07
ILMN_2089340	X	Xq26.3	RTL8A	retrotransposon Gag like 8A	26071	1.44759	1.54569e-06	1.41576e-05
ILMN_2093027	2	2q32.3	MYO1B	myosin IB	4430	1.44608	2.31417e-08	3.8605e-07
ILMN_2121408	5	5q31.3	HBEGF	heparin binding EGF like growth factor	1839	1.44585	4.21609e-08	6.42644e-07
ILMN_2203729	6	6p22.1	HCG4	HLA complex group 4	54435	1.44509	1.41409e-05	9.8645e-05
ILMN_1735930	19	19p13.11	KLF2	Kruppel like factor 2	10365	1.44183	1.41683e-08	2.55875e-07
ILMN_1652128	6	6q13	LMBRD1	LMBR1 domain containing 1	55788	1.44093	1.96445e-08	3.36346e-07
ILMN_1795778	5	5q31.1	P4HA2	prolyl 4-hydroxylase subunit alpha 2	8974	1.4408	6.37455e-09	1.30386e-07
ILMN_1671693	18	18q12.2	TPGS2	tubulin polyglutamylase complex subunit 2	25941	1.44045	5.82283e-09	1.20787e-07
ILMN_1772712	1	1p36.33	UBE2J2	ubiquitin conjugating enzyme E2 J2	118424	1.44015	1.83679e-08	3.18697e-07
ILMN_1743966	11	11q23.3	BCL9L	BCL9 like	283149	1.43982	2.36851e-07	2.80126e-06
ILMN_2089073	20	20q13.2	ATP9A	ATPase phospholipid transporting 9A (putative)	10079	1.43872	4.06334e-09	8.89447e-08
ILMN_1746408	19	19p13.3	MIDN	midnolin	90007	1.43812	2.56955e-07	3.004e-06
ILMN_1767324	8	8p11.23	EIF4EBP1	eukaryotic translation initiation factor 4E binding protein 1	1978	1.43666	4.61451e-07	4.95453e-06
ILMN_1700448	21	21q22.13	SIM2	SIM bHLH transcription factor 2	6493	1.43664	7.14245e-07	7.25739e-06
ILMN_1668748	22	22q11.21	MED15	mediator complex subunit 15	51586	1.43586	2.08906e-06	1.84059e-05
ILMN_1744614	12	12p13.31	PLEKHG6	pleckstrin homology and RhoGEF domain containing G6	55200	1.43551	1.79936e-07	2.2171e-06
ILMN_3244969	16	16p11.2	ZNF48	zinc finger protein 48	197407	1.43474	1.8959e-07	2.30638e-06
ILMN_1660111	13	13q22.2	UCHL3	ubiquitin C-terminal hydrolase L3	7347	1.43446	5.31739e-09	1.12124e-07
ILMN_1795911	5	5q15	TTC37	tetratricopeptide repeat domain 37	9652	1.43251	7.47221e-08	1.04002e-06
ILMN_1707448	17	17q12	CDK12	cyclin dependent kinase 12	51755	1.43038	3.58826e-08	5.63594e-07
ILMN_1699357	5	5q31.1	SLC22A5	solute carrier family 22 member 5	6584	1.4298	3.30632e-08	5.25051e-07
ILMN_2061185	16	16p11.2	SH2B1	SH2B adaptor protein 1	25970	1.42873	2.69497e-05	0.000174351
ILMN_1654773	X	Xp11.4	CASK	calcium/calmodulin dependent serine protein kinase	8573	1.42677	1.41565e-08	2.55796e-07
ILMN_1701643	11	11q13.4-q13.5	GDPD5	glycerophosphodiester phosphodiesterase domain containing 5	81544	1.42658	1.09985e-08	2.06415e-07
ILMN_2106107	X	Xq26.3	RTL8B	retrotransposon Gag like 8B	441518	1.42523	2.47579e-08	4.09377e-07
ILMN_1751020	6	6p21.31	PACSIN1	protein kinase C and casein kinase substrate in neurons 1	29993	1.42387	4.60062e-07	4.94115e-06
ILMN_1752755	12	12p13.31	VWF	von Willebrand factor	7450	1.42382	5.31549e-06	4.1964e-05
ILMN_3237241	19	19p13.11	FAM32A	family with sequence similarity 32 member A	26017	1.42272	1.35733e-07	1.75001e-06
ILMN_1860288	X	Xp22.12	MBTPS2	membrane bound transcription factor peptidase, site 2	51360	1.4226	3.87656e-07	4.27091e-06
ILMN_1677963	3	3q22.1	TMCC1	transmembrane and coiled-coil domain family 1	23023	1.42224	1.25813e-07	1.63433e-06
ILMN_2124082	11	11q13.1	PPP2R5B	protein phosphatase 2 regulatory subunit B'beta	5526	1.42215	1.567e-06	1.43337e-05
ILMN_1776998	15	15q25.1	DNAJA4	DnaJ heat shock protein family (Hsp40) member A4	55466	1.42149	6.09973e-07	6.31771e-06
ILMN_2175112	2	2p24.2	KCNS3	potassium voltage-gated channel modifier subfamily S member 3	3790	1.42005	4.02994e-09	8.83818e-08
ILMN_1779517	9	9q21.32	RASEF	RAS and EF-hand domain containing	158158	1.41895	0.00016022	0.000843321
ILMN_2102670	3	3q21.3	GATA2	GATA binding protein 2	2624	1.41778	3.79021e-06	3.1261e-05
ILMN_1665384	1	1q44	SH3BP5L	SH3 binding domain protein 5 like	80851	1.4166	1.21414e-06	1.14713e-05
ILMN_1723048	1	1q42.13	GJC2	gap junction protein gamma 2	57165	1.4161	5.89931e-08	8.49898e-07
ILMN_1753568	3	3q26.2	LRRC34	leucine rich repeat containing 34	151827	1.41236	3.23749e-07	3.66073e-06
ILMN_1651642	7	7q22.1	GPC2	glypican 2	221914	1.41166	4.92891e-05	0.000295632
ILMN_3246962	22	22q11.23	SPECC1L	sperm antigen with calponin homology and coiled-coil domains 1 like	23384	1.41154	1.72242e-08	3.01585e-07
ILMN_2381197	8	8q22.2	RNF19A	ring finger protein 19A, RBR E3 ubiquitin protein ligase	25897	1.41077	5.58946e-06	4.38857e-05
ILMN_1768962	19	19p13.12	AKAP8L	A-kinase anchoring protein 8 like	26993	1.40981	8.54045e-06	6.33456e-05
ILMN_2385161	X	Xq24	CUL4B	cullin 4B	8450	1.40933	2.8884e-07	3.32046e-06
ILMN_2243553	X	Xq28	ZNF275	zinc finger protein 275	10838	1.40927	5.35623e-06	4.2247e-05
ILMN_1739810	17	17p11.2	RAI1	retinoic acid induced 1	10743	1.40884	5.5027e-08	7.99457e-07
ILMN_1664861	20	20q11.21	ID1	inhibitor of DNA binding 1, HLH protein	3397	1.4088	4.92133e-08	7.30068e-07
ILMN_1745079	4	4q31.3	TRIM2	tripartite motif containing 2	23321	1.40869	1.2908e-07	1.67362e-06
ILMN_1684726	2	2q21.2	C2orf27A	chromosome 2 open reading frame 27A	29798	1.40817	5.66548e-08	8.20685e-07
ILMN_1746633	9	9p13.3	FAM219A	family with sequence similarity 219 member A	203259	1.40769	5.15836e-07	5.45353e-06
ILMN_1720430	20	20q13.33	PPDPF	pancreatic progenitor cell differentiation and proliferation factor	79144	1.40758	0.000170919	0.000893493
ILMN_1751871	19	19p13.3	STK11	serine/threonine kinase 11	6794	1.40689	1.19329e-06	1.13022e-05
ILMN_1760890	1	1p36.11	SELENON	selenoprotein N	57190	1.40594	2.25919e-07	2.68579e-06
ILMN_1807737	c("X", "Y")	c("Xp22.33", "Yp11.32")	AKAP17A	A-kinase anchoring protein 17A	8227	1.40581	5.91736e-09	1.22499e-07
ILMN_1686116	15	15q14	THBS1	thrombospondin 1	7057	1.40529	4.81995e-06	3.85462e-05
ILMN_1696494	3	3p22.3	CMTM6	CKLF like MARVEL transmembrane domain containing 6	54918	1.40477	3.64301e-08	5.70115e-07
ILMN_1659029	22	22q13.33	DENND6B	DENN domain containing 6B	414918	1.40463	3.55898e-07	3.96828e-06
ILMN_2147435	5	5q21.3	MAN2A1	mannosidase alpha class 2A member 1	4124	1.40445	3.69168e-08	5.7747e-07
ILMN_1724984	2	2p11.2	EIF2AK3	eukaryotic translation initiation factor 2 alpha kinase 3	9451	1.40391	8.80342e-09	1.69936e-07
ILMN_2206812	10	10q24.1	CCNJ	cyclin J	54619	1.40295	1.87385e-06	1.67235e-05
ILMN_2322986	3	3q11.2	RIOX2	ribosomal oxygenase 2	84864	1.40137	6.01349e-06	4.6736e-05
ILMN_1743714	22	22q13.1	CARD10	caspase recruitment domain family member 10	29775	1.40113	1.3726e-08	2.49852e-07
ILMN_1779841	11	11q23.1	PPP2R1B	protein phosphatase 2 scaffold subunit Abeta	5519	1.40087	5.41037e-07	5.6799e-06
ILMN_1745389	18	18q12.2	KIAA1328	KIAA1328	57536	1.40052	1.23358e-06	1.16422e-05
ILMN_1747195	6	6p21.32	PSMB8	proteasome 20S subunit beta 8	5696	1.40043	1.06458e-07	1.41435e-06
ILMN_2185563	5	5q13.2	ANKRA2	ankyrin repeat family A member 2	57763	1.39952	1.84016e-07	2.25964e-06
ILMN_3244363	19	19p13.12	WIZ	WIZ zinc finger	58525	1.39823	2.46586e-05	0.000161346
ILMN_1686664	16	16q13	MT2A	metallothionein 2A	4502	1.39574	1.19836e-09	3.2002e-08
ILMN_2192620	19	19p13.12	DCAF15	DDB1 and CUL4 associated factor 15	90379	1.39561	9.04963e-07	8.89635e-06
ILMN_1793770	7	7q36.3	DNAJB6	DnaJ heat shock protein family (Hsp40) member B6	10049	1.39345	6.52224e-09	1.33054e-07
ILMN_1806030	16	16p13.3	PPL	periplakin	5493	1.39319	2.06473e-07	2.48546e-06
ILMN_1663618	17	17q21.2	STAT3	signal transducer and activator of transcription 3	6774	1.39302	1.26093e-06	1.18678e-05
ILMN_1720501	17	17q24.2	ABCA9	ATP binding cassette subfamily A member 9	10350	1.3929	1.22732e-07	1.59853e-06
ILMN_1707372	1	1q42.13	RNF187	ring finger protein 187	149603	1.39204	1.05959e-05	7.65674e-05
ILMN_1741942	20	20q13.32	STX16	syntaxin 16	8675	1.39041	2.79108e-09	6.51051e-08
ILMN_2366463	2	2q35	FN1	fibronectin 1	2335	1.39031	1.40281e-07	1.7999e-06
ILMN_2178775	19	19q13.12	ZNF585B	zinc finger protein 585B	92285	1.38964	3.70395e-06	3.06229e-05
ILMN_1794106	11	11q24.2	FEZ1	fasciculation and elongation protein zeta 1	9638	1.38914	5.51913e-09	1.156e-07
ILMN_1691156	16	16q13	MT1A	metallothionein 1A	4489	1.38667	1.16273e-09	3.11957e-08
ILMN_1681855	X	Xp11.23	TBC1D25	TBC1 domain family member 25	4943	1.38547	2.24308e-06	1.96625e-05
ILMN_1665510	1	1p36.23	ERRFI1	ERBB receptor feedback inhibitor 1	54206	1.38284	7.70457e-07	7.76675e-06
ILMN_2325168	11	11q13.4	ARRB1	arrestin beta 1	408	1.38205	2.72362e-07	3.15297e-06
ILMN_1757552	17	17q21.2	CAVIN1	caveolae associated protein 1	284119	1.38168	5.943e-10	1.7542e-08
ILMN_1810584	2	2q11.2-q12.1	IL1R1	interleukin 1 receptor type 1	3554	1.38056	1.56857e-05	0.000108086
ILMN_1732609	9	9p13.3	FAM214B	family with sequence similarity 214 member B	80256	1.3781	3.30529e-08	5.25051e-07
ILMN_1700257	4	4q25	FAM241A	family with sequence similarity 241 member A	132720	1.37682	1.68022e-05	0.000114981
ILMN_1703132	6	6q15	LYRM2	LYR motif containing 2	57226	1.37655	4.89808e-05	0.000294141
ILMN_1685824	20	20q13.13	B4GALT5	beta-1,4-galactosyltransferase 5	9334	1.37626	2.7855e-08	4.54917e-07
ILMN_1698491	19	19p13.3	MBD3	methyl-CpG binding domain protein 3	53615	1.37571	2.03041e-07	2.44671e-06
ILMN_1806415	22	22q13.2	TTLL1	tubulin tyrosine ligase like 1	25809	1.37534	1.36287e-09	3.56228e-08
ILMN_1716979	1	1p13.3	GSTM4	glutathione S-transferase mu 4	2948	1.37471	1.36951e-06	1.27402e-05
ILMN_1673275	X	Xp22.2	TRAPPC2	trafficking protein particle complex 2	6399	1.37273	5.25074e-09	1.10854e-07
ILMN_1799796	13	13q21.33	DIS3	DIS3 homolog, exosome endoribonuclease and 3'-5' exoribonuclease	22894	1.37239	4.63397e-06	3.7251e-05
ILMN_2234310	1	1p36.33	CPTP	ceramide-1-phosphate transfer protein	80772	1.3714	4.6637e-07	5.00111e-06
ILMN_2394381	16	16p12.1	CLN3	CLN3 lysosomal/endosomal transmembrane protein, battenin	1201	1.3694	4.59091e-09	9.83765e-08
ILMN_1692731	7	7p22.3	TTYH3	tweety family member 3	80727	1.3683	9.37456e-07	9.16093e-06
ILMN_1677800	19	19p13.3	SGTA	small glutamine rich tetratricopeptide repeat containing alpha	6449	1.36772	9.70978e-08	1.30153e-06
ILMN_1673363	19	19p13.12	ADGRE5	adhesion G protein-coupled receptor E5	976	1.36703	1.78389e-08	3.11085e-07
ILMN_1806705	9	9q34.11	ASB6	ankyrin repeat and SOCS box containing 6	140459	1.36613	5.05368e-07	5.36425e-06
ILMN_1654357	18	18q12.2	ZNF24	zinc finger protein 24	7572	1.36533	7.06677e-09	1.42061e-07
ILMN_1665554	8	8p11.23	BRF2	BRF2 RNA polymerase III transcription initiation factor subunit	55290	1.36446	9.38127e-09	1.79583e-07
ILMN_1707513	19	19p13.11	PGPEP1	pyroglutamyl-peptidase I	54858	1.36441	4.54919e-07	4.89049e-06
ILMN_1697561	16	16p13.3	FBXL16	F-box and leucine rich repeat protein 16	146330	1.36427	1.28535e-07	1.66718e-06
ILMN_3244286	17	17q23.2-q23.3	TANC2	tetratricopeptide repeat, ankyrin repeat and coiled-coil containing 2	26115	1.36331	3.51833e-06	2.9299e-05
ILMN_1756573	12	12q13.3	NDUFA4L2	NDUFA4 mitochondrial complex associated like 2	56901	1.36328	1.0002e-07	1.33759e-06
ILMN_2075820	16	16p13.3	ZNF598	zinc finger protein 598, E3 ubiquitin ligase	90850	1.36268	9.52803e-08	1.28216e-06
ILMN_1670158	8	8q24.13	FAM83A	family with sequence similarity 83 member A	84985	1.36266	3.32597e-08	5.27443e-07
ILMN_1734010	10	10q25.3	CCDC186	coiled-coil domain containing 186	55088	1.36185	1.35257e-05	9.48561e-05
ILMN_3241237	9	9q34.3	RNF208	ring finger protein 208	727800	1.3614	5.71131e-08	8.26282e-07
ILMN_1680313	16	16p11.2	STX4	syntaxin 4	6810	1.36011	2.16154e-05	0.000143559
ILMN_1761322	18	18q12.2	FHOD3	formin homology 2 domain containing 3	80206	1.35907	1.46173e-09	3.77771e-08
ILMN_1687958	11	11p15.5	SLC25A22	solute carrier family 25 member 22	79751	1.35887	3.93864e-07	4.32035e-06
ILMN_1757742	10	10q26.13	ZRANB1	zinc finger RANBP2-type containing 1	54764	1.35761	7.28941e-07	7.39146e-06
ILMN_1676563	10	10q26.13	HTRA1	HtrA serine peptidase 1	5654	1.35712	2.90073e-08	4.6973e-07
ILMN_3239795	11	11q23.1	SIK2	salt inducible kinase 2	23235	1.35667	4.85979e-05	0.000292248
ILMN_2374159	16	16q13	HERPUD1	homocysteine inducible ER protein with ubiquitin like domain 1	9709	1.35525	1.05877e-09	2.88328e-08
ILMN_2224031	5	5q14.3	CETN3	centrin 3	1070	1.35513	3.66121e-06	3.03277e-05
ILMN_3239460	15	15q22.31	OAZ2	ornithine decarboxylase antizyme 2	4947	1.35462	0.00441189	0.0161693
ILMN_3251317	1	1p36.32	RER1	retention in endoplasmic reticulum sorting receptor 1	11079	1.35456	3.47503e-06	2.89945e-05
ILMN_1709795	22	22q13.1	RAC2	Rac family small GTPase 2	5880	1.35363	7.65637e-09	1.51702e-07
ILMN_3246388	X	Xp11.4	MED14	mediator complex subunit 14	9282	1.35146	1.13372e-08	2.11619e-07
ILMN_1689353	X	Xq26.1	APLN	apelin	8862	1.35132	6.74803e-05	0.000390672
ILMN_1697503	5	5q11.2	DHX29	DExH-box helicase 29	54505	1.35058	2.91932e-09	6.73671e-08
ILMN_3249603	6	6q22.31	NKAIN2	sodium/potassium transporting ATPase interacting 2	154215	1.348	3.55004e-05	0.000221936
ILMN_2163819	1	1q32.1	KIF21B	kinesin family member 21B	23046	1.34765	9.13557e-06	6.70837e-05
ILMN_2228044	3	3q12.1-q12.2	TBC1D23	TBC1 domain family member 23	55773	1.34598	3.15136e-05	0.000199607
ILMN_2054019	1	1p36.33	ISG15	ISG15 ubiquitin like modifier	9636	1.3459	1.20991e-08	2.24383e-07
ILMN_1764383	19	19p13.2	MCOLN1	mucolipin 1	57192	1.34469	1.77361e-07	2.18773e-06
ILMN_1697448	1	1q21.1	TXNIP	thioredoxin interacting protein	10628	1.34139	3.50051e-08	5.51912e-07
ILMN_1790228	15	15q26.1	FURIN	furin, paired basic amino acid cleaving enzyme	5045	1.33967	3.87304e-07	4.27045e-06
ILMN_3245236	16	16p11.2	FBRS	fibrosin	64319	1.33961	3.50928e-08	5.52447e-07
ILMN_1731101	1	1q41	USH2A	usherin	7399	1.33929	1.38878e-06	1.28916e-05
ILMN_2163070	6	6q13	KHDC1	KH domain containing 1	80759	1.33804	7.80856e-08	1.07813e-06
ILMN_1776337	11	11q14.3	CHORDC1	cysteine and histidine rich domain containing 1	26973	1.33619	1.11618e-06	1.06863e-05
ILMN_1727194	7	7q32.1	CALU	calumenin	813	1.33601	1.42834e-08	2.57145e-07
ILMN_1746924	19	19q13.41	ZNF610	zinc finger protein 610	162963	1.33485	6.56812e-08	9.32629e-07
ILMN_1788283	16	16q24.1	COTL1	coactosin like F-actin binding protein 1	23406	1.33455	0.000180375	0.000938235
ILMN_1785266	X	Xp22.2	OFD1	OFD1 centriole and centriolar satellite protein	8481	1.33454	1.75165e-06	1.58047e-05
ILMN_1680364	6	6q13	CD109	CD109 molecule	135228	1.33377	7.32279e-07	7.42094e-06
ILMN_1710523	18	18q21.31	ATP8B1	ATPase phospholipid transporting 8B1	5205	1.33312	1.36498e-07	1.75791e-06
ILMN_1785900	21	21q21.1	CXADR	CXADR Ig-like cell adhesion molecule	1525	1.33135	2.9507e-08	4.76033e-07
ILMN_2229922	12	12p11.21	RESF1	retroelement silencing factor 1	55196	1.33131	5.44622e-06	4.28587e-05
ILMN_1686985	X	Xq28	MTM1	myotubularin 1	4534	1.32998	3.24311e-07	3.66589e-06
ILMN_2205050	X	Xp22.33	PRKX	protein kinase X-linked	5613	1.3287	8.55923e-09	1.66118e-07
ILMN_1784977	19	19p13.3	DOHH	deoxyhypusine hydroxylase	83475	1.32819	8.30562e-07	8.29023e-06
ILMN_1757338	3	3q24	PLSCR4	phospholipid scramblase 4	57088	1.32814	5.19071e-06	4.11485e-05
ILMN_2048043	8	8p23.1	DEFB4A	defensin beta 4A	1673	1.32545	3.34027e-07	3.76218e-06
ILMN_2089977	7	7p11.2	FKBP9P1	FKBP prolyl isomerase 9 pseudogene 1	360132	1.32533	1.93696e-08	3.33227e-07
ILMN_1794740	11	11p15.5	CD151	CD151 molecule (Raph blood group)	977	1.32499	6.20104e-08	8.86984e-07
ILMN_1791728	9	9q34.11	SLC25A25	solute carrier family 25 member 25	114789	1.32489	1.92017e-07	2.3318e-06
ILMN_1775956	2	2q31.1	SP5	Sp5 transcription factor	389058	1.32469	3.88387e-06	3.19724e-05
ILMN_1747627	9	9q34.3	ABCA2	ATP binding cassette subfamily A member 2	20	1.32355	0.00018396	0.00095501
ILMN_1664960	14	14q32.33	CEP170B	centrosomal protein 170B	283638	1.32194	7.10137e-06	5.38318e-05
ILMN_1710989	15	15q11.2	GOLGA8S	golgin A8 family member S	653061	1.32181	7.36517e-06	5.56236e-05
ILMN_3251409	5	5q32	PDE6A	phosphodiesterase 6A	5145	1.32175	2.05232e-06	1.81193e-05
ILMN_1678814	19	19p13.2	UBL5	ubiquitin like 5	59286	1.32009	0.000264167	0.0013142
ILMN_1657968	19	19p13.3	MAP2K2	mitogen-activated protein kinase kinase 2	5605	1.32006	1.05269e-07	1.40125e-06
ILMN_1785635	9	9q34.2	BRD3	bromodomain containing 3	8019	1.31659	0.00134911	0.0056302
ILMN_1663646	5	5q23.1	DMXL1	Dmx like 1	1657	1.31626	5.42914e-07	5.69787e-06
ILMN_1750409	X	Xp22.2	RAB9A	RAB9A, member RAS oncogene family	9367	1.31542	7.93414e-09	1.55773e-07
ILMN_1905548	X	Xq26.2	MBNL3	muscleblind like splicing regulator 3	55796	1.31517	1.70545e-06	1.54364e-05
ILMN_2098418	22	22q12.2	CASTOR1	cytosolic arginine sensor for mTORC1 subunit 1	652968	1.31296	2.31269e-08	3.8605e-07
ILMN_1701461	22	22q12.3	TIMP3	TIMP metallopeptidase inhibitor 3	7078	1.3117	1.29318e-06	1.21349e-05
ILMN_2349658	22	22q13.2	TSPO	translocator protein	706	1.31142	1.31675e-08	2.42113e-07
ILMN_1714349	15	15q23	GLCE	glucuronic acid epimerase	26035	1.31138	1.14349e-07	1.50815e-06
ILMN_1678962	1	1p36.32	DFFB	DNA fragmentation factor subunit beta	1677	1.31005	4.27913e-07	4.64068e-06
ILMN_1656938	11	11q24.2	SLC37A2	solute carrier family 37 member 2	219855	1.30941	1.52903e-06	1.40125e-05
ILMN_1655404	7	7q35	TCAF2	TRPM8 channel associated factor 2	285966	1.3093	5.88605e-07	6.11412e-06
ILMN_1671116	3	3q29	XXYLT1	xyloside xylosyltransferase 1	152002	1.30913	7.18851e-08	1.00826e-06
ILMN_2413779	16	16p11.2	SEZ6L2	seizure related 6 homolog like 2	26470	1.30878	7.68192e-09	1.52033e-07
ILMN_1725612	22	22q13.31	NUP50	nucleoporin 50	10762	1.30844	3.13758e-07	3.56303e-06
ILMN_1811104	3	3q13.33	POGLUT1	protein O-glucosyltransferase 1	56983	1.3073	8.74426e-06	6.46668e-05
ILMN_1738369	16	16p11.2	TUFM	Tu translation elongation factor, mitochondrial	7284	1.30607	8.59428e-08	1.17252e-06
ILMN_1683995	6	6p22.1	HCG18	HLA complex group 18	414777	1.3054	7.12282e-05	0.000410098
ILMN_2056032	c("X", "Y")	c("Xp22.32", "Yp11.3")	CD99	CD99 molecule (Xg blood group)	4267	1.30458	1.87556e-07	2.29054e-06
ILMN_1687275	14	14q11.2	AJUBA	ajuba LIM protein	84962	1.30249	1.03826e-08	1.96461e-07
ILMN_1814856	9	9q34.2	CACFD1	calcium channel flower domain containing 1	11094	1.30211	4.76911e-07	5.09829e-06
ILMN_1790987	X	Xp11.22	HUWE1	HECT, UBA and WWE domain containing E3 ubiquitin protein ligase 1	10075	1.29948	5.46513e-08	7.95003e-07
ILMN_1788062	19	19p13.3	SH3GL1	SH3 domain containing GRB2 like 1, endophilin A2	6455	1.29749	4.74886e-07	5.08294e-06
ILMN_1783908	16	16q22.1	B3GNT9	UDP-GlcNAc:betaGal beta-1,3-N-acetylglucosaminyltransferase 9	84752	1.29724	7.20309e-08	1.00949e-06
ILMN_1682781	19	19q13.33	TEAD2	TEA domain transcription factor 2	8463	1.2969	1.2938e-09	3.40496e-08
ILMN_1670926	10	10q26.13	CHST15	carbohydrate sulfotransferase 15	51363	1.29676	4.13708e-09	9.03865e-08
ILMN_1737416	10	10q11.23	PGBD3	piggyBac transposable element derived 3	267004	1.29604	1.04555e-06	1.00885e-05
ILMN_1726930	5	5q12.3	TRAPPC13	trafficking protein particle complex 13	80006	1.2952	1.34664e-06	1.25545e-05
ILMN_1801504	21	21q22.12	RUNX1	RUNX family transcription factor 1	861	1.29106	4.38986e-08	6.656e-07
ILMN_2340565	3	3q22.1	ATP2C1	ATPase secretory pathway Ca2+ transporting 1	27032	1.29035	1.05205e-08	1.98634e-07
ILMN_1800412	8	8p21.3	BMP1	bone morphogenetic protein 1	649	1.28917	3.06781e-07	3.49639e-06
ILMN_1656477	22	22q13.33	ARSA	arylsulfatase A	410	1.28916	9.92199e-07	9.62495e-06
ILMN_1729487	6	6p22.3	GMPR	guanosine monophosphate reductase	2766	1.2885	6.82017e-06	5.20896e-05
ILMN_1678052	19	19p13.3	FAM174C	family with sequence similarity 174 member C	55009	1.28833	5.23192e-08	7.6821e-07
ILMN_1705602	1	1p36.33	KLHL17	kelch like family member 17	339451	1.28827	1.66249e-07	2.07893e-06
ILMN_1748755	7	7q31.31	KCND2	potassium voltage-gated channel subfamily D member 2	3751	1.28796	7.08294e-05	0.000408023
ILMN_1679600	20	20q13.12	ACOT8	acyl-CoA thioesterase 8	10005	1.28565	1.21306e-05	8.63188e-05
ILMN_3274596	3	3q27.3	EIF4A2	eukaryotic translation initiation factor 4A2	1974	1.2853	3.74418e-08	5.82773e-07
ILMN_1801776	19	19q13.31	PSG9	pregnancy specific beta-1-glycoprotein 9	5678	1.28467	4.82917e-05	0.000290711
ILMN_2060652	11	11p15.5	BET1L	Bet1 golgi vesicular membrane trafficking protein like	51272	1.2843	4.51747e-06	3.64399e-05
ILMN_1741628	1	1q25.2	ABL2	ABL proto-oncogene 2, non-receptor tyrosine kinase	27	1.28381	1.70338e-05	0.000116358
ILMN_1738691	13	13q31.1	POU4F1	POU class 4 homeobox 1	5457	1.28166	5.44838e-07	5.71632e-06
ILMN_1792389	18	18q21.1	RNF165	ring finger protein 165	494470	1.28138	4.16437e-06	3.39411e-05
ILMN_1660633	3	3q27.1	CAMK2N2	calcium/calmodulin dependent protein kinase II inhibitor 2	94032	1.28093	5.13506e-06	4.07735e-05
ILMN_1687867	12	12q13.13	KRT8	keratin 8	3856	1.28028	1.50826e-07	1.90611e-06
ILMN_2309446	16	16p12.1	RBBP6	RB binding protein 6, ubiquitin ligase	5930	1.27829	8.88412e-07	8.76865e-06
ILMN_1787815	20	20p13	TRIB3	tribbles pseudokinase 3	57761	1.27733	9.60037e-09	1.82964e-07
ILMN_1702715	X	Xq28	MECP2	methyl-CpG binding protein 2	4204	1.27481	1.14868e-07	1.51268e-06
ILMN_1770922	3	3q12.2	TMEM45A	transmembrane protein 45A	55076	1.27473	8.7864e-08	1.19589e-06
ILMN_1773109	1	1p35.2	ADGRB2	adhesion G protein-coupled receptor B2	576	1.27238	0.000106406	0.000585733
ILMN_1776653	X	Xp22.13	SCML1	Scm polycomb group protein like 1	6322	1.272	4.5142e-06	3.64306e-05
ILMN_1770373	3	3q13.33	TMEM39A	transmembrane protein 39A	55254	1.26954	5.50826e-06	4.32876e-05
ILMN_1759676	12	12q13.13	HOXC13	homeobox C13	3229	1.26952	3.99385e-05	0.000246142
ILMN_1801246	11	11p15.5	IFITM1	interferon induced transmembrane protein 1	8519	1.26946	1.84109e-07	2.25964e-06
ILMN_3244929	22	22q11.21	BCRP2	BCR pseudogene 2	400892	1.26867	2.51535e-06	2.17668e-05
ILMN_1743412	11	11q24.2	SIAE	sialic acid acetylesterase	54414	1.26678	3.69936e-06	3.05923e-05
ILMN_1672991	11	11q14.3	UBTFL1	upstream binding transcription factor like 1	642623	1.26575	3.33442e-06	2.79637e-05
ILMN_1738955	10	10q22.1	ANAPC16	anaphase promoting complex subunit 16	119504	1.26336	4.55644e-06	3.67285e-05
ILMN_3305466	19	19p13.2	ZNF788P	zinc finger family member 788, pseudogene	388507	1.26163	2.80978e-06	2.40431e-05
ILMN_1778917	5	5q13.2	CDK7	cyclin dependent kinase 7	1022	1.26011	5.74728e-07	5.98964e-06
ILMN_2098643	11	11q12.2	FADS3	fatty acid desaturase 3	3995	1.2601	5.91835e-06	4.61214e-05
ILMN_1755954	10	10q23.32	CPEB3	cytoplasmic polyadenylation element binding protein 3	22849	1.25969	5.166e-06	4.09809e-05
ILMN_1736539	12	12q23.3	ALDH1L2	aldehyde dehydrogenase 1 family member L2	160428	1.2585	1.02171e-05	7.41569e-05
ILMN_1789732	20	20q13.13	PEDS1	plasmanylethanolamine desaturase 1	387521	1.25768	4.39325e-08	6.65765e-07
ILMN_1724406	16	16p11.2	INO80E	INO80 complex subunit E	283899	1.25741	3.1538e-05	0.000199688
ILMN_1713491	17	17p13.1	VAMP2	vesicle associated membrane protein 2	6844	1.25612	6.1371e-06	4.7568e-05
ILMN_1707720	19	19q13.32	SLC1A5	solute carrier family 1 member 5	6510	1.25575	4.58183e-07	4.92251e-06
ILMN_1672102	12	12q15	PTPRB	protein tyrosine phosphatase receptor type B	5787	1.25567	9.2133e-08	1.24662e-06
ILMN_1730799	17	17q11.2	PHF12	PHD finger protein 12	57649	1.2556	4.39022e-08	6.656e-07
ILMN_1707236	X	Xp22.2	HCCS	holocytochrome c synthase	3052	1.25542	1.13127e-06	1.08008e-05
ILMN_1865764	3	3q26.32	ZMAT3	zinc finger matrin-type 3	64393	1.25224	5.68073e-07	5.93122e-06
ILMN_1708778	9	9q34.11	ASS1	argininosuccinate synthase 1	445	1.25139	2.58646e-09	6.09924e-08
ILMN_1750051	X	Xq11.2	AMER1	APC membrane recruitment protein 1	139285	1.25005	8.56093e-08	1.1689e-06
ILMN_1766159	19	19p13.3	MIER2	MIER family member 2	54531	1.25002	2.61425e-06	2.25266e-05
ILMN_1803939	X	Xq12-q13.1	YIPF6	Yip1 domain family member 6	286451	1.24958	5.75867e-05	0.000339319
ILMN_1688702	5	5q21.3	PJA2	praja ring finger ubiquitin ligase 2	9867	1.24938	1.39374e-08	2.52499e-07
ILMN_2365465	22	c("22q12.1", "22q12")	XBP1	X-box binding protein 1	7494	1.24931	1.9316e-09	4.78748e-08
ILMN_1741356	12	12q12	PRICKLE1	prickle planar cell polarity protein 1	144165	1.24916	2.21319e-08	3.71841e-07
ILMN_1796013	17	17q25.3	PYCR1	pyrroline-5-carboxylate reductase 1	5831	1.2488	2.54042e-07	2.976e-06
ILMN_2043816	9	9q33.3	ARPC5L	actin related protein 2/3 complex subunit 5 like	81873	1.24875	1.59061e-07	1.99774e-06
ILMN_1813669	6	6p21.31	ANKS1A	ankyrin repeat and sterile alpha motif domain containing 1A	23294	1.24839	7.994e-08	1.1002e-06
ILMN_2209180	18	18q12.2	RPRD1A	regulation of nuclear pre-mRNA domain containing 1A	55197	1.24803	4.64375e-08	6.96078e-07
ILMN_1778240	6	6p23	GFOD1	glucose-fructose oxidoreductase domain containing 1	54438	1.24782	3.22525e-08	5.14071e-07
ILMN_1698470	X	Xp22.2	SYAP1	synapse associated protein 1	94056	1.24719	1.12852e-08	2.10763e-07
ILMN_1705261	11	11q13.1	CAPN1	calpain 1	823	1.24676	2.50793e-05	0.000163787
ILMN_1694778	12	12q13.13	KRT18	keratin 18	3875	1.24642	2.98417e-09	6.86796e-08
ILMN_2317923	11	11q12.2	TMEM132A	transmembrane protein 132A	54972	1.24539	1.62656e-06	1.48235e-05
ILMN_1781285	5	5q35.1	DUSP1	dual specificity phosphatase 1	1843	1.24487	9.83239e-07	9.54877e-06
ILMN_1756992	1	1q22	MUC1	mucin 1, cell surface associated	4582	1.24478	1.55992e-06	1.42804e-05
ILMN_1744268	8	8q24.3	PLEC	plectin	5339	1.24399	1.22803e-05	8.72578e-05
ILMN_1741159	10	10p11.23	MAP3K8	mitogen-activated protein kinase kinase kinase 8	1326	1.24276	5.88969e-07	6.11605e-06
ILMN_1869897	1	1q31.3	NEK7	NIMA related kinase 7	140609	1.24151	0.000144008	0.000768785
ILMN_1678054	11	11p15.4	TRIM21	tripartite motif containing 21	6737	1.24109	3.16496e-08	5.05397e-07
ILMN_1773868	X	Xp22.2	ZRSR2	zinc finger CCCH-type, RNA binding motif and serine/arginine rich 2	8233	1.24109	5.32276e-07	5.59474e-06
ILMN_1712687	3	3q29	PAK2	p21 (RAC1) activated kinase 2	5062	1.2396	1.46701e-08	2.62872e-07
ILMN_1735908	5	5q13.2	UTP15	UTP15 small subunit processome component	84135	1.23913	1.28335e-06	1.20575e-05
ILMN_1728742	5	5q33.2	FAXDC2	fatty acid hydroxylase domain containing 2	10826	1.2379	1.36358e-06	1.26953e-05
ILMN_1709124	19	19p13.11	ANO8	anoctamin 8	57719	1.23588	3.65293e-05	0.000227572
ILMN_1753639	9	9p21.3	MTAP	methylthioadenosine phosphorylase	4507	1.2348	3.667e-07	4.06768e-06
ILMN_1790985	10	10q11.21	CSGALNACT2	chondroitin sulfate N-acetylgalactosaminyltransferase 2	55454	1.23412	8.56675e-07	8.5139e-06
ILMN_1676625	20	20q13.33	SS18L1	SS18L1 subunit of BAF chromatin remodeling complex	26039	1.23317	2.29272e-07	2.71909e-06
ILMN_1747112	8	8q24.3	GPAA1	glycosylphosphatidylinositol anchor attachment 1	8733	1.23259	7.21151e-07	7.31677e-06
ILMN_1810387	9	9p21.2	PLAA	phospholipase A2 activating protein	9373	1.23155	1.10398e-06	1.05901e-05
ILMN_1778132	11	11q23.3	C2CD2L	C2CD2 like	9854	1.23146	1.90649e-06	1.69708e-05
ILMN_1681467	17	17q11.2	RAB11FIP4	RAB11 family interacting protein 4	84440	1.23142	1.75685e-06	1.58392e-05
ILMN_1718766	16	16q13	MT1F	metallothionein 1F	4494	1.23141	0.000153753	0.000814381
ILMN_1689200	19	19q13.33	DHDH	dihydrodiol dehydrogenase	27294	1.23077	1.31465e-06	1.23156e-05
ILMN_1765523	11	11p15.5	TOLLIP	toll interacting protein	54472	1.23037	9.6296e-07	9.38886e-06
ILMN_1744046	X	Xq21.33	DIAPH2	diaphanous related formin 2	1730	1.22951	8.71426e-09	1.68499e-07
ILMN_1682857	5	5q12.1	NDUFAF2	NADH:ubiquinone oxidoreductase complex assembly factor 2	91942	1.22763	6.63964e-08	9.40847e-07
ILMN_1781636	1	1p36.33	VWA1	von Willebrand factor A domain containing 1	64856	1.22751	4.0852e-07	4.45559e-06
ILMN_2113490	12	12q22	NTN4	netrin 4	59277	1.22717	1.38653e-05	9.69615e-05
ILMN_1766803	22	22q13.33	TUBGCP6	tubulin gamma complex associated protein 6	85378	1.22677	2.65915e-07	3.09405e-06
ILMN_2270607	9	9p13.3	RGP1	RGP1 homolog, RAB6A GEF complex partner 1	9827	1.22603	3.50938e-06	2.92386e-05
ILMN_1723418	9	9q34.13	CEL	carboxyl ester lipase	1056	1.22595	5.7769e-06	4.51825e-05
ILMN_1682081	1	1p35.1	RNF19B	ring finger protein 19B	127544	1.22541	5.46984e-08	7.95087e-07
ILMN_1687235	19	19q13.11	HPN	hepsin	3249	1.22527	3.77696e-08	5.86552e-07
ILMN_1803977	18	18q12.2	GALNT1	polypeptide N-acetylgalactosaminyltransferase 1	2589	1.22483	7.07239e-06	5.36593e-05
ILMN_1675406	8	8p11.23	PLPP5	phospholipid phosphatase 5	84513	1.22437	3.08564e-07	3.51554e-06
ILMN_3248132	1	1p36.32	LOC100129534	small nuclear ribonucleoprotein polypeptide N pseudogene	100129534	1.22405	1.68187e-08	2.95838e-07
ILMN_1661940	1	1p36.31-p36.23	CAMTA1	calmodulin binding transcription activator 1	23261	1.22372	7.81273e-06	5.85039e-05
ILMN_1721563	2	2q11.2	TMEM127	transmembrane protein 127	55654	1.22332	6.41478e-07	6.59576e-06
ILMN_1753467	19	19q13.2	SAMD4B	sterile alpha motif domain containing 4B	55095	1.22232	1.30483e-05	9.19755e-05
ILMN_1793934	22	22q12.2	PISD	phosphatidylserine decarboxylase	23761	1.22208	5.90166e-08	8.49898e-07
ILMN_1750079	7	7p13	PURB	purine rich element binding protein B	5814	1.22183	1.75939e-08	3.07434e-07
ILMN_1658094	10	10q21.2	ZNF365	zinc finger protein 365	22891	1.22129	1.74437e-07	2.15708e-06
ILMN_1689237	6	6q21	BVES	blood vessel epicardial substance	11149	1.22114	1.49755e-05	0.000103694
ILMN_1763634	1	1p36.22	PEX14	peroxisomal biogenesis factor 14	5195	1.22021	1.59791e-06	1.45894e-05
ILMN_1662390	16	16p11.2	ASPHD1	aspartate beta-hydroxylase domain containing 1	253982	1.21832	1.16457e-05	8.3281e-05
ILMN_1729775	3	3q29	OPA1	OPA1 mitochondrial dynamin like GTPase	4976	1.21817	8.22471e-09	1.60291e-07
ILMN_2096604	16	16q13	PSME3IP1	proteasome activator subunit 3 interacting protein 1	80011	1.21754	2.93186e-07	3.35922e-06
ILMN_2191436	X	Xp22.11-p21.3	POLA1	DNA polymerase alpha 1, catalytic subunit	5422	1.21754	8.76141e-08	1.19296e-06
ILMN_1697975	7	7p21.3	PHF14	PHD finger protein 14	9678	1.21716	1.00743e-08	1.91257e-07
ILMN_1716056	22	22q13.33	LMF2	lipase maturation factor 2	91289	1.21484	8.82775e-08	1.20057e-06
ILMN_1772278	2	2q24.2	TANC1	tetratricopeptide repeat, ankyrin repeat and coiled-coil containing 1	85461	1.2146	3.27529e-07	3.69862e-06
ILMN_1806306	15	15q26.1	SV2B	synaptic vesicle glycoprotein 2B	9899	1.21348	4.65607e-06	3.74091e-05
ILMN_1690397	7	7q21.3	DYNC1I1	dynein cytoplasmic 1 intermediate chain 1	1780	1.21129	9.01606e-05	0.000505921
ILMN_1796663	11	11p15.5	B4GALNT4	beta-1,4-N-acetyl-galactosaminyltransferase 4	338707	1.21116	3.21351e-07	3.63958e-06
ILMN_1697409	1	1p36.32	TNFRSF14	TNF receptor superfamily member 14	8764	1.20988	2.60434e-07	3.04055e-06
ILMN_3251733	19	19p13.13	TRIR	telomerase RNA component interacting RNase	79002	1.20915	4.16183e-08	6.35726e-07
ILMN_1709824	5	5q31.3	PCDHGB1	protocadherin gamma subfamily B, 1	56104	1.20905	8.45915e-07	8.41732e-06
ILMN_1750400	19	19p13.2	SHFL	shiftless antiviral inhibitor of ribosomal frameshifting	55337	1.2087	8.0937e-08	1.11215e-06
ILMN_1653283	21	21q21.3	APP	amyloid beta precursor protein	351	1.20766	3.45572e-05	0.000216617
ILMN_1735499	3	c("3q12.1", "3")	DCBLD2	discoidin, CUB and LCCL domain containing 2	131566	1.20585	2.31567e-08	3.8605e-07
ILMN_1762281	9	9p13.3	DCTN3	dynactin subunit 3	11258	1.20568	2.75121e-09	6.43493e-08
ILMN_1653278	3	3q29	MUC20	mucin 20, cell surface associated	200958	1.20534	5.45839e-08	7.94358e-07
ILMN_2382505	11	11p15.4	SLC22A18	solute carrier family 22 member 18	5002	1.2053	5.43808e-06	4.28044e-05
ILMN_1741572	19	19p13.12	AKAP8	A-kinase anchoring protein 8	10270	1.20508	2.15668e-07	2.57546e-06
ILMN_2413572	11	11q13.1	MARK2	microtubule affinity regulating kinase 2	2011	1.20429	0.000685199	0.00307951
ILMN_2339691	11	11q13.1	SYVN1	synoviolin 1	84447	1.20408	3.75298e-07	4.15503e-06
ILMN_1772189	X	Xq28	ABCD1	ATP binding cassette subfamily D member 1	215	1.20139	2.63882e-07	3.07455e-06
ILMN_1662340	19	19p13.2	ZNF358	zinc finger protein 358	140467	1.20071	9.17924e-08	1.24298e-06
ILMN_1765401	16	16p13.11	RRN3	RRN3 homolog, RNA polymerase I transcription factor	54700	1.20048	3.97029e-07	4.34815e-06
ILMN_1789618	5	5q21.3	FER	FER tyrosine kinase	2241	1.19966	2.89749e-05	0.00018578
ILMN_1801051	5	5q31.3	PCDHB8	protocadherin beta 8	56128	1.19914	1.05303e-05	7.61416e-05
ILMN_1706531	3	3q27.1	ABCC5	ATP binding cassette subfamily C member 5	10057	1.19853	5.70979e-07	5.95434e-06
ILMN_1790891	12	12q23.3	CKAP4	cytoskeleton associated protein 4	10970	1.19559	1.17642e-08	2.1888e-07
ILMN_1792078	20	20q13.13	RNF114	ring finger protein 114	55905	1.19536	3.1241e-07	3.55232e-06
ILMN_1804351	2	2q33.1	FZD7	frizzled class receptor 7	8324	1.19498	7.67517e-07	7.7439e-06
ILMN_1718558	7	7q34	PARP12	poly(ADP-ribose) polymerase family member 12	64761	1.1947	7.7206e-08	1.06898e-06
ILMN_3235326	20	20q11.23	SNHG17	small nucleolar RNA host gene 17	388796	1.19438	5.87839e-09	1.21793e-07
ILMN_1766951	5	5q35.2	MSX2	msh homeobox 2	4488	1.19401	2.15895e-06	1.89635e-05
ILMN_1680109	5	5q13.3	CERT1	ceramide transporter 1	10087	1.19238	5.84244e-05	0.000343785
ILMN_1783156	17	17p11.2	MAP2K3	mitogen-activated protein kinase kinase 3	5606	1.1922	5.09399e-07	5.39409e-06
ILMN_1788250	X	Xq27.1	LDOC1	LDOC1 regulator of NFKB signaling	23641	1.19201	9.20172e-08	1.24554e-06
ILMN_1664608	10	10q26.3	INPP5A	inositol polyphosphate-5-phosphatase A	3632	1.19119	4.67852e-08	6.99769e-07
ILMN_1786976	20	20q13.32	RAB22A	RAB22A, member RAS oncogene family	57403	1.1906	1.51195e-07	1.91007e-06
ILMN_2115669	2	2q11.2	SEMA4C	semaphorin 4C	54910	1.19036	1.69509e-05	0.00011586
ILMN_3250321	8	8q24.3	PTP4A3	protein tyrosine phosphatase 4A3	11156	1.18996	2.85368e-05	0.000183312
ILMN_1684051	1	1p36.11	WASF2	WASP family member 2	10163	1.18718	1.43436e-05	9.98605e-05
ILMN_2048388	1	1p34.2	ZFP69B	ZFP69 zinc finger protein B	65243	1.18619	1.87745e-06	1.67513e-05
ILMN_1815130	22	22q13.1	MICALL1	MICAL like 1	85377	1.18587	6.97303e-06	5.30546e-05
ILMN_1704446	16	16p11.2	SLC6A10P	solute carrier family 6 member 10, pseudogene	386757	1.18498	5.04789e-05	0.000301823
ILMN_1688071	8	8p22	NAT1	N-acetyltransferase 1	9	1.18496	6.70631e-06	5.13336e-05
ILMN_1787844	19	19p13.3	MYDGF	myeloid derived growth factor	56005	1.18408	2.88504e-06	2.45834e-05
ILMN_2051867	5	5q13.2	PTCD2	pentatricopeptide repeat domain 2	79810	1.18408	9.22736e-07	9.04014e-06
ILMN_1656386	4	4q26	SEC24D	SEC24 homolog D, COPII coat complex component	9871	1.18369	1.61462e-07	2.02421e-06
ILMN_2369104	14	14q21.1	TRAPPC6B	trafficking protein particle complex 6B	122553	1.18335	6.17681e-07	6.38536e-06
ILMN_1711792	5	5q11.2	GPBP1	GC-rich promoter binding protein 1	65056	1.18325	1.35126e-07	1.74348e-06
ILMN_1685631	19	19p13.11	MAU2	MAU2 sister chromatid cohesion factor	23383	1.18321	7.70275e-08	1.06693e-06
ILMN_1726288	7	7p21.3	TMEM106B	transmembrane protein 106B	54664	1.18317	2.10266e-05	0.000140107
ILMN_1714223	8	8p11.23	LETM2	leucine zipper and EF-hand containing transmembrane protein 2	137994	1.18291	4.11785e-06	3.36096e-05
ILMN_2323944	20	20p13	FAM110A	family with sequence similarity 110 member A	83541	1.18231	2.51534e-07	2.95062e-06
ILMN_2201678	3	3q13.33	FSTL1	follistatin like 1	11167	1.18052	6.65613e-09	1.35145e-07
ILMN_1729217	3	3q27.1	FAM131A	family with sequence similarity 131 member A	131408	1.1802	4.37126e-06	3.54347e-05
ILMN_1745686	8	8p23.1	MFHAS1	malignant fibrous histiocytoma amplified sequence 1	9258	1.17998	0.000400796	0.00190538
ILMN_2322747	14	14q12	ARHGAP5	Rho GTPase activating protein 5	394	1.17898	3.81885e-05	0.000236583
ILMN_1735052	12	12q24.33	ULK1	unc-51 like autophagy activating kinase 1	8408	1.17869	6.202e-09	1.27425e-07
ILMN_1659524	6	6q16.1	NDUFAF4	NADH:ubiquinone oxidoreductase complex assembly factor 4	29078	1.17822	7.13056e-06	5.40174e-05
ILMN_1778374	19	19p13.3	BSG	basigin (Ok blood group)	682	1.17763	1.14326e-06	1.09002e-05
ILMN_1730928	17	17q11.2	CDK5R1	cyclin dependent kinase 5 regulatory subunit 1	8851	1.17683	1.05805e-05	7.64722e-05
ILMN_2363621	18	18q11.2	RBBP8	RB binding protein 8, endonuclease	5932	1.17606	8.27152e-08	1.13432e-06
ILMN_1805792	5	5p15.2	TRIO	trio Rho guanine nucleotide exchange factor	7204	1.17534	1.00706e-07	1.34467e-06
ILMN_1747460	22	22q13.1	TMEM184B	transmembrane protein 184B	25829	1.17531	6.70954e-08	9.49192e-07
ILMN_3308265	4	4q25	MIR302C	microRNA 302c	442895	1.1747	2.2472e-05	0.000148618
ILMN_1759341	19	19p13.13	MAN2B1	mannosidase alpha class 2B member 1	4125	1.17391	2.83355e-07	3.26502e-06
ILMN_1681703	6	6q21	FOXO3	forkhead box O3	2309	1.17375	0.0033092	0.0125399
ILMN_1764850	2	2p25.1	HPCAL1	hippocalcin like 1	3241	1.17374	4.79866e-07	5.12353e-06
ILMN_1776173	16	16q23.1	PSMD7	proteasome 26S subunit, non-ATPase 7	5713	1.17215	1.72504e-07	2.14084e-06
ILMN_1806349	X	Xq28	SLC6A8	solute carrier family 6 member 8	6535	1.17007	5.01346e-05	0.000299921
ILMN_1706511	22	22q13.2	TEF	TEF transcription factor, PAR bZIP family member	7008	1.16968	3.9376e-07	4.32035e-06
ILMN_1788387	13	13q32.1	UGGT2	UDP-glucose glycoprotein glucosyltransferase 2	55757	1.16922	1.42079e-06	1.3164e-05
ILMN_1677877	22	22q11.21	UBE2L3	ubiquitin conjugating enzyme E2 L3	7332	1.16812	3.43251e-07	3.84218e-06
ILMN_1696127	6	6p21.1	BICRAL	BRD4 interacting chromatin remodeling complex associated protein like	23506	1.16737	5.56192e-08	8.0704e-07
ILMN_3249742	20	20q11.22	PXMP4	peroxisomal membrane protein 4	11264	1.1673	0.000128017	0.000692644
ILMN_1685140	5	5q23.2	PRRC1	proline rich coiled-coil 1	133619	1.16546	3.94046e-06	3.23933e-05
ILMN_1670870	3	3q13.11	ALCAM	activated leukocyte cell adhesion molecule	214	1.16486	1.16499e-07	1.52948e-06
ILMN_2413141	6	6q15	SMIM8	small integral membrane protein 8	57150	1.16465	1.96318e-05	0.000131909
ILMN_1713006	19	19p13.3	CDC34	cell division cycle 34, ubiqiutin conjugating enzyme	997	1.16436	1.73181e-05	0.000118066
ILMN_2347068	19	19p13.3	MKNK2	MAPK interacting serine/threonine kinase 2	2872	1.16433	3.56935e-07	3.97213e-06
ILMN_1753613	7	7p15.2	HOXA5	homeobox A5	3202	1.16361	0.000299087	0.0014678
ILMN_1805833	19	19q13.42	FAM90A27P	family with sequence similarity 90 member A27, pseudogene	646508	1.16309	1.46407e-06	1.34957e-05
ILMN_1749419	7	7q36.1	PRKAG2	protein kinase AMP-activated non-catalytic subunit gamma 2	51422	1.16298	2.14068e-07	2.55994e-06
ILMN_1694752	10	10q11.23	PARG	poly(ADP-ribose) glycohydrolase	8505	1.16249	1.36146e-08	2.48216e-07
ILMN_1770676	11	11p13	CAPRIN1	cell cycle associated protein 1	4076	1.16242	5.11124e-06	4.06213e-05
ILMN_1652631	9	9p13.3	GLIPR2	GLI pathogenesis related 2	152007	1.16091	1.13971e-07	1.50373e-06
ILMN_1761294	14	14q11.2	OR4K15	olfactory receptor family 4 subfamily K member 15	81127	1.15933	1.10216e-08	2.06736e-07
ILMN_2372413	22	22q11.21	BID	BH3 interacting domain death agonist	637	1.15871	3.10126e-07	3.53101e-06
ILMN_1691717	17	17q25.1	RHBDF2	rhomboid 5 homolog 2	79651	1.15852	1.45481e-08	2.60958e-07
ILMN_1786382	Un	NA	LOC389834	ankyrin repeat domain 57 pseudogene	389834	1.15782	0.00048401	0.00225435
ILMN_1672091	2	2q31.1	HOXD4	homeobox D4	3233	1.1573	6.35576e-06	4.90084e-05
ILMN_1691444	9	9p24.1	UHRF2	ubiquitin like with PHD and ring finger domains 2	115426	1.1566	6.33456e-07	6.52724e-06
ILMN_2401826	X	Xp11.23	FTSJ1	FtsJ RNA 2'-O-methyltransferase 1	24140	1.15638	2.47514e-07	2.9104e-06
ILMN_2402363	6	6p21.33	STK19	serine/threonine kinase 19	8859	1.15335	2.58729e-07	3.02166e-06
ILMN_1755657	19	19q13.33	RASIP1	Ras interacting protein 1	54922	1.15279	8.25079e-07	8.23789e-06
ILMN_1805064	11	11q21	SCARNA9	small Cajal body-specific RNA 9	619383	1.15216	5.13838e-06	4.07899e-05
ILMN_2175020	3	3q21.3	RPL32P3	ribosomal protein L32 pseudogene 3	132241	1.15197	1.43544e-06	1.32747e-05
ILMN_1787324	16	16q22.1	ENKD1	enkurin domain containing 1	84080	1.15139	1.8713e-08	3.23708e-07
ILMN_1652185	16	16p12.1	IL4R	interleukin 4 receptor	3566	1.15132	7.14762e-09	1.43435e-07
ILMN_2319588	16	16q23.3	OSGIN1	oxidative stress induced growth inhibitor 1	29948	1.15083	2.29542e-06	2.00804e-05
ILMN_1762316	1	1p36.33	INTS11	integrator complex subunit 11	54973	1.15041	1.0566e-07	1.40518e-06
ILMN_2170080	3	3p25.3	CIDECP1	cell death inducing DFFA like effector c pseudogene 1	152302	1.15015	4.44791e-07	4.79656e-06
ILMN_1755391	16	16q13	ARL2BP	ADP ribosylation factor like GTPase 2 binding protein	23568	1.15011	1.85075e-08	3.20797e-07
ILMN_1679693	2	2q13	TMEM87B	transmembrane protein 87B	84910	1.14976	0.000161516	0.000849491
ILMN_1788315	19	19p13.11	SIN3B	SIN3 transcription regulator family member B	23309	1.14859	4.48307e-08	6.76701e-07
ILMN_2060145	8	8q22.3	GRHL2	grainyhead like transcription factor 2	79977	1.14841	6.30197e-06	4.86708e-05
ILMN_1694305	X	Xp22.11	SMS	spermine synthase	6611	1.147	1.5258e-08	2.71993e-07
ILMN_1719985	19	19p13.3	FEM1A	fem-1 homolog A	55527	1.14677	1.22385e-08	2.26724e-07
ILMN_3245564	17	17p12	ARHGAP44	Rho GTPase activating protein 44	9912	1.14585	4.36915e-07	4.72197e-06
ILMN_2412214	17	17q11.2	LGALS9	galectin 9	3965	1.14556	2.85226e-05	0.000183255
ILMN_1755710	1	1q21.3	EFNA4	ephrin A4	1945	1.14309	2.43608e-06	2.11758e-05
ILMN_1701216	16	16q24.2	BANP	BTG3 associated nuclear protein	54971	1.14279	4.28053e-08	6.51547e-07
ILMN_1757867	16	16q13	MT1DP	metallothionein 1D, pseudogene	326343	1.14238	8.53222e-05	0.000481199
ILMN_1742250	5	5q14.3	CCNH	cyclin H	902	1.14222	4.18247e-07	4.54014e-06
ILMN_1760320	1	1p36.33	GNB1	G protein subunit beta 1	2782	1.14168	2.3211e-09	5.59205e-08
ILMN_1677440	X	Xp11.4	ATP6AP2	ATPase H+ transporting accessory protein 2	10159	1.14164	4.51437e-08	6.80829e-07
ILMN_1862018	17	17q21.31	ATXN7L3	ataxin 7 like 3	56970	1.14087	3.24793e-07	3.67013e-06
ILMN_2053829	14	14q12	CBLN3	cerebellin 3 precursor	643866	1.14072	1.00692e-07	1.34467e-06
ILMN_1740395	19	19p13.2	RAVER1	ribonucleoprotein, PTB binding 1	125950	1.14009	1.45554e-07	1.85375e-06
ILMN_1776325	1	1q21.3	UBE2Q1	ubiquitin conjugating enzyme E2 Q1	55585	1.13954	1.5958e-06	1.4574e-05
ILMN_1774272	11	11q13.1	ESRRA	estrogen related receptor alpha	2101	1.13928	2.42174e-06	2.10573e-05
ILMN_1771462	19	19p13.3	RPL36	ribosomal protein L36	25873	1.13835	1.8111e-07	2.22839e-06
ILMN_2249288	1	1q24.2	TIPRL	TOR signaling pathway regulator	261726	1.13805	3.30631e-08	5.25051e-07
ILMN_1763638	1	1p22.1	BCAR3	BCAR3 adaptor protein, NSP family member	8412	1.13746	1.5012e-06	1.37794e-05
ILMN_1737650	14	14q31.1	DIO2	iodothyronine deiodinase 2	1734	1.13719	2.52835e-05	0.000164809
ILMN_1758888	1	1p36.13	PADI3	peptidyl arginine deiminase 3	51702	1.13595	0.000126669	0.000685994
ILMN_1745213	5	5q31.3	PCDHB3	protocadherin beta 3	56132	1.1357	1.4812e-07	1.87896e-06
ILMN_1745148	20	20q13.13	ZNFX1	zinc finger NFX1-type containing 1	57169	1.13547	4.40674e-08	6.67223e-07
ILMN_1726786	22	22q13.1	TNRC6B	trinucleotide repeat containing adaptor 6B	23112	1.13504	9.75312e-06	7.12089e-05
ILMN_3241510	3	3q29	FBXO45	F-box protein 45	200933	1.13473	8.06335e-07	8.07806e-06
ILMN_1673138	X	Xq24	ZBTB33	zinc finger and BTB domain containing 33	10009	1.13324	2.24339e-08	3.75818e-07
ILMN_1684873	X	Xp22.33	ARSD	arylsulfatase D	414	1.13169	1.09926e-05	7.90696e-05
ILMN_1803561	1	1q31.1	PLA2G4A	phospholipase A2 group IVA	5321	1.13058	6.54342e-06	5.01648e-05
ILMN_1683044	3	3q29	PPP1R2	protein phosphatase 1 regulatory inhibitor subunit 2	5504	1.12932	1.36733e-06	1.27233e-05
ILMN_2120273	X	Xp22.2	AP1S2	adaptor related protein complex 1 subunit sigma 2	8905	1.12924	3.71959e-08	5.79732e-07
ILMN_1738491	9	9q32	SNX30	sorting nexin family member 30	401548	1.12887	2.03333e-06	1.797e-05
ILMN_1673795	5	5q23.1	HSD17B4	hydroxysteroid 17-beta dehydrogenase 4	3295	1.12875	1.71367e-07	2.12979e-06
ILMN_1681845	5	5q14.1	TENT2	terminal nucleotidyltransferase 2	167153	1.12735	2.22984e-06	1.95563e-05
ILMN_1723871	11	11q13.1	OTUB1	OTU deubiquitinase, ubiquitin aldehyde binding 1	55611	1.12712	9.81682e-06	7.16285e-05
ILMN_2219512	1	1p36.31	NPHP4	nephrocystin 4	261734	1.12635	4.89923e-07	5.22058e-06
ILMN_1793578	9	9q32	ZFP37	ZFP37 zinc finger protein	7539	1.12499	5.0291e-08	7.43177e-07
ILMN_3235853	1	1p21.2	S1PR1	sphingosine-1-phosphate receptor 1	1901	1.12492	3.43131e-07	3.84209e-06
ILMN_3182422	1	1p36.33	FAAP20	FA core complex associated protein 20	199990	1.12479	1.02241e-06	9.87908e-06
ILMN_1684746	5	5q12.1	IPO11	importin 11	51194	1.12275	3.04616e-08	4.89373e-07
ILMN_1758250	12	12q24.13	TRAFD1	TRAF-type zinc finger domain containing 1	10906	1.12144	1.07947e-06	1.03838e-05
ILMN_1712291	7	7p22.3	MICALL2	MICAL like 2	79778	1.12135	1.42953e-05	9.95646e-05
ILMN_1675709	20	20q13.33	ARFGAP1	ADP ribosylation factor GTPase activating protein 1	55738	1.12102	5.72062e-08	8.27282e-07
ILMN_1714170	1	1p36.22	SPSB1	splA/ryanodine receptor domain and SOCS box containing 1	80176	1.12081	2.36372e-06	2.05995e-05
ILMN_1808860	11	11q12.3	STX5	syntaxin 5	6811	1.11922	1.04155e-05	7.54365e-05
ILMN_3238511	6	6p22.2	HCG11	HLA complex group 11	493812	1.11807	1.85427e-06	1.65659e-05
ILMN_1720829	19	19q13.2	ZFP36	ZFP36 ring finger protein	7538	1.11782	6.24388e-05	0.000364535
ILMN_3250614	7	7p22.1	EIF2AK1	eukaryotic translation initiation factor 2 alpha kinase 1	27102	1.11692	5.29966e-06	4.18486e-05
ILMN_1807283	5	5q33.1	NDST1	N-deacetylase and N-sulfotransferase 1	3340	1.11691	1.50208e-05	0.000103967
ILMN_1796900	7	7p13	NUDCD3	NudC domain containing 3	23386	1.11634	2.58469e-07	3.01965e-06
ILMN_3247802	9	9q34.13	PRRC2B	proline rich coiled-coil 2B	84726	1.1158	7.00536e-06	5.32327e-05
ILMN_2047206	18	18q22.1	TMX3	thioredoxin related transmembrane protein 3	54495	1.11562	1.27128e-07	1.64956e-06
ILMN_1769018	19	19p13.3	PCSK4	proprotein convertase subtilisin/kexin type 4	54760	1.11336	0.000164983	0.000865749
ILMN_1748105	11	11q12.2	DDB1	damage specific DNA binding protein 1	1642	1.11268	0.000576517	0.00263475
ILMN_1807649	2	2q22.1	SPOPL	speckle type BTB/POZ protein like	339745	1.11251	0.000104457	0.000575924
ILMN_3236346	17	17p11.2	ZNF286B	zinc finger protein 286B (pseudogene)	729288	1.11216	3.03811e-06	2.57261e-05
ILMN_2233604	19	19p13.2	ECSIT	ECSIT signaling integrator	51295	1.11096	2.09072e-05	0.000139527
ILMN_1761946	2	2q11.1	PROM2	prominin 2	150696	1.1106	1.68455e-05	0.000115231
ILMN_2189605	X	Xq26.3	FAM122B	family with sequence similarity 122B	159090	1.10983	2.50281e-07	2.93888e-06
ILMN_1751464	19	19p13.3	TNFSF9	TNF superfamily member 9	8744	1.10733	6.69082e-07	6.84371e-06
ILMN_1808295	17	17p11.2	MIEF2	mitochondrial elongation factor 2	125170	1.10622	3.25974e-06	2.74372e-05
ILMN_1658706	17	17q25.1	ST6GALNAC2	ST6 N-acetylgalactosaminide alpha-2,6-sialyltransferase 2	10610	1.10588	0.00105103	0.00451363
ILMN_1744665	22	22q13.2	EP300	E1A binding protein p300	2033	1.10494	6.81279e-05	0.000394024
ILMN_1764091	12	12q13.3	R3HDM2	R3H domain containing 2	22864	1.10476	2.22271e-05	0.000147111
ILMN_1872404	3	3q28	CCDC50	coiled-coil domain containing 50	152137	1.10398	5.06306e-05	0.000302573
ILMN_1737308	5	5q15	GLRX	glutaredoxin	2745	1.10301	4.31671e-07	4.67555e-06
ILMN_2376403	X	Xq22.3	TSC22D3	TSC22 domain family member 3	1831	1.10293	1.56952e-07	1.97485e-06
ILMN_2052686	6	6q14.1	LCA5	lebercilin LCA5	167691	1.10259	0.000126388	0.00068458
ILMN_2406656	10	10p14	GATA3	GATA binding protein 3	2625	1.10252	7.4763e-05	0.000428446
ILMN_1662587	9	9q34.3	PNPLA7	patatin like phospholipase domain containing 7	375775	1.10243	2.0746e-06	1.82973e-05
ILMN_1668834	11	11q14.1	RSF1	remodeling and spacing factor 1	51773	1.10211	0.00664992	0.0233441
ILMN_1680132	11	11q23.3	CADM1	cell adhesion molecule 1	23705	1.10194	1.08009e-08	2.03038e-07
ILMN_1673649	11	11q23.3	HYOU1	hypoxia up-regulated 1	10525	1.10138	8.42025e-08	1.15289e-06
ILMN_1751474	1	1p22.1	ARHGAP29	Rho GTPase activating protein 29	9411	1.10107	0.000273753	0.00135719
ILMN_1742089	5	5q12.3	NLN	neurolysin	57486	1.10005	1.99359e-06	1.76414e-05
ILMN_2283196	20	20q13.12	ZSWIM3	zinc finger SWIM-type containing 3	140831	1.09984	3.58563e-06	2.97732e-05
ILMN_1772540	16	16q23.2	ATMIN	ATM interactor	23300	1.09934	1.93895e-06	1.72287e-05
ILMN_1766593	11	11p15.5	PHRF1	PHD and ring finger domains 1	57661	1.0987	7.34748e-08	1.02555e-06
ILMN_1659027	1	1p34.2	SLC2A1	solute carrier family 2 member 1	6513	1.09848	5.51242e-08	8.00531e-07
ILMN_2383871	22	22q11.21	ZNF74	zinc finger protein 74	7625	1.09793	5.02934e-05	0.000300818
ILMN_1726575	21	21q21.1	CHODL	chondrolectin	140578	1.09791	6.95685e-06	5.29664e-05
ILMN_1726659	19	19p13.3	THOP1	thimet oligopeptidase 1	7064	1.09672	5.97873e-06	4.65095e-05
ILMN_1771599	3	3q24	PLOD2	procollagen-lysine,2-oxoglutarate 5-dioxygenase 2	5352	1.09655	3.63016e-08	5.68362e-07
ILMN_2096031	12	12q21.1	TRHDE-AS1	TRHDE antisense RNA 1	283392	1.09476	1.44303e-06	1.33342e-05
ILMN_1680134	19	19p13.2	CARM1	coactivator associated arginine methyltransferase 1	10498	1.09439	5.28798e-06	4.17947e-05
ILMN_1746801	1	1q21.3	CGN	cingulin	57530	1.09419	1.6119e-06	1.47016e-05
ILMN_1666546	17	17q12	DUSP14	dual specificity phosphatase 14	11072	1.09398	5.29424e-08	7.7505e-07
ILMN_1757106	5	5p15.2	MARCHF6	membrane associated ring-CH-type finger 6	10299	1.09386	0.000432106	0.00203543
ILMN_1654331	17	17q21.32	HOXB4	homeobox B4	3214	1.09383	1.71258e-05	0.000116847
ILMN_1742260	2	2q31.3	ITPRID2	ITPR interacting domain containing 2	6744	1.09345	0.00247984	0.0096977
ILMN_1683859	13	13q12.3	SLC7A1	solute carrier family 7 member 1	6541	1.09294	1.11828e-07	1.47715e-06
ILMN_1667030	16	16q23.3	HSBP1	heat shock factor binding protein 1	3281	1.09261	5.43619e-09	1.14144e-07
ILMN_1815102	16	16q22.1	LCAT	lecithin-cholesterol acyltransferase	3931	1.09256	4.90382e-05	0.000294383
ILMN_1726114	1	1q32.1	SLC45A3	solute carrier family 45 member 3	85414	1.09242	4.27064e-06	3.46986e-05
ILMN_2404085	12	12q24.31	CLIP1	CAP-Gly domain containing linker protein 1	6249	1.09207	1.12861e-06	1.07843e-05
ILMN_1788832	18	18q11.2	MIB1	mindbomb E3 ubiquitin protein ligase 1	57534	1.09143	1.59029e-07	1.99774e-06
ILMN_2122952	10	10q21.1	CISD1	CDGSH iron sulfur domain 1	55847	1.09121	3.92704e-07	4.31449e-06
ILMN_1783075	6	6q16.1	MMS22L	MMS22 like, DNA repair protein	253714	1.0912	2.0197e-06	1.78633e-05
ILMN_1791754	22	22q13.33	CPT1B	carnitine palmitoyltransferase 1B	1375	1.09043	0.000133749	0.000720377
ILMN_1803476	6	6p21.31	KCTD20	potassium channel tetramerization domain containing 20	222658	1.08964	0.000192353	0.000992899
ILMN_1724145	17	17q25.3	CBX4	chromobox 4	8535	1.08915	5.86717e-07	6.09634e-06
ILMN_1801121	3	3q27.2	SENP2	SUMO specific peptidase 2	59343	1.08909	3.13765e-07	3.56303e-06
ILMN_1815656	20	20q13.12	SERINC3	serine incorporator 3	10955	1.0872	1.58246e-08	2.8103e-07
ILMN_1756525	1	1q25.1	KLHL20	kelch like family member 20	27252	1.08714	5.20948e-06	4.12499e-05
ILMN_1804445	16	16p13.2-p13.13	ATF7IP2	activating transcription factor 7 interacting protein 2	80063	1.08588	1.39043e-05	9.72143e-05
ILMN_1779639	6	6q14.1	IRAK1BP1	interleukin 1 receptor associated kinase 1 binding protein 1	134728	1.08584	1.406e-06	1.30445e-05
ILMN_1771333	3	3q13.12	CD47	CD47 molecule	961	1.08575	4.44616e-05	0.000270679
ILMN_1810729	13	13q12.3	UBL3	ubiquitin like 3	5412	1.08557	7.50836e-05	0.00042964
ILMN_1721651	7	7q32.2	UBE2H	ubiquitin conjugating enzyme E2 H	7328	1.08332	7.01824e-06	5.33071e-05
ILMN_1804454	6	6q13	FAM135A	family with sequence similarity 135 member A	57579	1.0829	1.32506e-06	1.23903e-05
ILMN_1721901	9	9q31.3	CTNNAL1	catenin alpha like 1	8727	1.08267	5.37e-08	7.84143e-07
ILMN_1805750	11	11p15.5	IFITM3	interferon induced transmembrane protein 3	10410	1.08263	8.86992e-07	8.75714e-06
ILMN_1672605	7	7p14.3	MTURN	maturin, neural progenitor differentiation regulator homolog	222166	1.08258	7.08175e-07	7.21058e-06
ILMN_1784105	16	16q21	SLC38A7	solute carrier family 38 member 7	55238	1.08168	0.00629269	0.0222213
ILMN_1713322	7	7p22.1	CCZ1B	CCZ1 homolog B, vacuolar protein trafficking and biogenesis associated	221960	1.08095	7.38434e-06	5.57439e-05
ILMN_1748004	9	9q34.3	PAEP	progestagen associated endometrial protein	5047	1.08064	4.1152e-07	4.48122e-06
ILMN_2380740	6	6q13	MTO1	mitochondrial tRNA translation optimization 1	25821	1.0802	2.64509e-07	3.08081e-06
ILMN_2214278	5	5q15	SLF1	SMC5-SMC6 complex localization factor 1	84250	1.07972	9.2797e-07	9.08625e-06
ILMN_1808712	16	16p11.2	RNF40	ring finger protein 40	9810	1.07813	7.59905e-07	7.67834e-06
ILMN_1773200	16	16p12.3	CCP110	centriolar coiled-coil protein 110	9738	1.0769	3.13201e-07	3.55897e-06
ILMN_1758672	10	10p13	FAM107B	family with sequence similarity 107 member B	83641	1.07659	1.84972e-07	2.26781e-06
ILMN_1777982	1	1q23.3	USF1	upstream transcription factor 1	7391	1.07613	1.0737e-05	7.74735e-05
ILMN_3247821	1	1q32.3	PACC1	proton activated chloride channel 1	55248	1.07565	1.44919e-05	0.000100751
ILMN_1700024	6	6q25.1	UST	uronyl 2-sulfotransferase	10090	1.07551	5.0426e-06	4.01325e-05
ILMN_3307892	11	11p15.3	PARVA	parvin alpha	55742	1.0735	1.16468e-07	1.52948e-06
ILMN_1731418	2	2q37.1	SP110	SP110 nuclear body protein	3431	1.07349	4.53524e-07	4.88006e-06
ILMN_1713636	1	1q21.3	S100A6	S100 calcium binding protein A6	6277	1.07342	3.92674e-07	4.31449e-06
ILMN_1761259	11	11p11.2	EXT2	exostosin glycosyltransferase 2	2132	1.07313	4.76907e-07	5.09829e-06
ILMN_1699843	19	19p13.11	CRTC1	CREB regulated transcription coactivator 1	23373	1.07227	3.8712e-05	0.00023931
ILMN_1774077	1	1p22.2	GBP2	guanylate binding protein 2	2634	1.07189	2.33986e-07	2.77022e-06
ILMN_1683059	6	6p23	SIRT5	sirtuin 5	23408	1.07065	8.12608e-09	1.58818e-07
ILMN_1702322	3	3p21.31	ALS2CL	ALS2 C-terminal like	259173	1.0704	1.27401e-05	9.01717e-05
ILMN_1686623	5	5q32	CSF1R	colony stimulating factor 1 receptor	1436	1.07002	5.8192e-07	6.0538e-06
ILMN_1706687	4	4p14	KLHL5	kelch like family member 5	51088	1.06943	1.33534e-07	1.72553e-06
ILMN_2141157	6	6p23	RANBP9	RAN binding protein 9	10048	1.06926	2.6751e-05	0.000173261
ILMN_1770290	19	19p13.3	CNN2	calponin 2	1265	1.06896	4.47416e-08	6.75947e-07
ILMN_3240626	9	9q34.11	IER5L	immediate early response 5 like	389792	1.06883	0.000226503	0.00114719
ILMN_1722811	12	12p13.1	CDKN1B	cyclin dependent kinase inhibitor 1B	1027	1.06668	5.0052e-06	3.98981e-05
ILMN_1757347	22	22q13.31	KIAA0930	KIAA0930	23313	1.06665	8.61248e-05	0.000485249
ILMN_1801822	18	18q21.1	C18orf25	chromosome 18 open reading frame 25	147339	1.0666	5.2578e-07	5.53609e-06
ILMN_1803925	22	22q12.2	MTMR3	myotubularin related protein 3	8897	1.06583	4.73533e-07	5.07161e-06
ILMN_1800975	17	17q21.31	PSME3	proteasome activator subunit 3	10197	1.06574	7.8342e-07	7.88289e-06
ILMN_1700633	14	14q11.2	ABHD4	abhydrolase domain containing 4, N-acyl phospholipase B	63874	1.06563	1.48954e-05	0.000103227
ILMN_1688318	20	20q11.1	FRG1BP	FSHD region gene 1 family member B, pseudogene	284802	1.06549	8.98368e-05	0.000504449
ILMN_1798690	15	15q25.2	ADAMTSL3	ADAMTS like 3	57188	1.0648	1.3132e-05	9.24337e-05
ILMN_1736180	10	10q24.1	FRAT1	FRAT regulator of WNT signaling pathway 1	10023	1.06465	1.42913e-05	9.95567e-05
ILMN_1708787	19	19p13.2	ZNF627	zinc finger protein 627	199692	1.06464	9.29817e-06	6.81615e-05
ILMN_1651769	5	5q14.1	ZFYVE16	zinc finger FYVE-type containing 16	9765	1.06459	1.82336e-06	1.63193e-05
ILMN_1721136	1	1p36.22	H6PD	hexose-6-phosphate dehydrogenase/glucose 1-dehydrogenase	9563	1.06446	5.8944e-06	4.59763e-05
ILMN_1770787	6	6p21.33	DDAH2	dimethylarginine dimethylaminohydrolase 2	23564	1.06301	3.37331e-06	2.82415e-05
ILMN_1787345	12	12q13.12	FKBP11	FKBP prolyl isomerase 11	51303	1.06258	4.35023e-05	0.000265593
ILMN_2364022	17	17q25.3	SLC16A3	solute carrier family 16 member 3	9123	1.06136	1.92807e-06	1.71408e-05
ILMN_1809208	19	19p13.2	CAMSAP3	calmodulin regulated spectrin associated protein family member 3	57662	1.06096	1.23626e-05	8.77523e-05
ILMN_1676307	2	2q24.3	FIGN	fidgetin, microtubule severing factor	55137	1.06068	2.26693e-06	1.98564e-05
ILMN_1714093	2	2p11.2	RMND5A	required for meiotic nuclear division 5 homolog A	64795	1.06062	3.42876e-05	0.000215084
ILMN_1786347	5	5q13.2	TNPO1	transportin 1	3842	1.06059	1.09349e-05	7.86709e-05
ILMN_1781700	2	2q12.1	IL18R1	interleukin 18 receptor 1	8809	1.05996	3.59827e-06	2.98709e-05
ILMN_1715613	16	16p11.2	TAOK2	TAO kinase 2	9344	1.0593	4.16323e-05	0.000255622
ILMN_1712918	6	6p25.2	NQO2	N-ribosyldihydronicotinamide:quinone reductase 2	4835	1.05739	1.33531e-06	1.24591e-05
ILMN_2108709	16	16q24.3	ANKRD11	ankyrin repeat domain 11	29123	1.05676	3.00035e-06	2.5459e-05
ILMN_1741260	6	6q15	MDN1	midasin AAA ATPase 1	23195	1.05631	0.00368186	0.0137884
ILMN_1738699	17	17p13.1	FXR2	FMR1 autosomal homolog 2	9513	1.05624	1.33362e-05	9.36606e-05
ILMN_2232084	4	4p16.3	ABCA11P	ATP binding cassette subfamily A member 11, pseudogene	79963	1.05542	1.78183e-06	1.60196e-05
ILMN_1737484	22	22q11.21	RTN4R	reticulon 4 receptor	65078	1.05487	5.61013e-06	4.40179e-05
ILMN_1691117	20	20q13.12	DNTTIP1	deoxynucleotidyltransferase terminal interacting protein 1	116092	1.05429	8.96168e-07	8.83256e-06
ILMN_1813400	4	4q32.3	CBR4	carbonyl reductase 4	84869	1.05404	7.63486e-07	7.70774e-06
ILMN_1732767	12	12q24.31	PSMD9	proteasome 26S subunit, non-ATPase 9	5715	1.05364	3.8426e-06	3.16629e-05
ILMN_3244157	22	22q13.1	SNORD83B	small nucleolar RNA, C/D box 83B	116938	1.05363	6.02418e-06	4.67981e-05
ILMN_2157544	10	10q24.32	GBF1	golgi brefeldin A resistant guanine nucleotide exchange factor 1	8729	1.05322	3.60171e-05	0.000224787
ILMN_1726333	20	20p11.23	RALGAPA2	Ral GTPase activating protein catalytic subunit alpha 2	57186	1.05296	2.73528e-05	0.000176793
ILMN_2406892	19	19q12	URI1	URI1 prefoldin like chaperone	8725	1.05144	2.15664e-05	0.000143289
ILMN_2135756	21	21q22.3	HSF2BP	heat shock transcription factor 2 binding protein	11077	1.05027	1.90966e-05	0.000128866
ILMN_1731568	19	19p13.2	RAB3D	RAB3D, member RAS oncogene family	9545	1.0496	9.11829e-07	8.95363e-06
ILMN_2095133	9	9q34.11	SPTAN1	spectrin alpha, non-erythrocytic 1	6709	1.04936	3.89274e-08	6.01385e-07
ILMN_1803312	5	5q12.1	DIMT1	DIMT1 rRNA methyltransferase and ribosome maturation factor	27292	1.04808	2.10442e-08	3.56346e-07
ILMN_1750641	16	16p11.2	SRCAP	Snf2 related CREBBP activator protein	10847	1.04795	6.59644e-05	0.000382667
ILMN_1675671	21	21q22.3	ICOSLG	inducible T cell costimulator ligand	23308	1.04731	1.70492e-05	0.000116394
ILMN_2380418	9	9q22.31	BICD2	BICD cargo adaptor 2	23299	1.04713	9.86203e-05	0.000547598
ILMN_3236289	3	3q13.31	TIGIT	T cell immunoreceptor with Ig and ITIM domains	201633	1.0465	1.21086e-05	8.61978e-05
ILMN_1699071	21	21q21.3	MAP3K7CL	MAP3K7 C-terminal like	56911	1.04581	3.41138e-08	5.39004e-07
ILMN_1688011	19	19p13.11	UPF1	UPF1 RNA helicase and ATPase	5976	1.04577	2.40091e-06	2.08972e-05
ILMN_1690325	6	6p21.1	NFYA	nuclear transcription factor Y subunit alpha	4800	1.04553	7.77013e-05	0.000442928
ILMN_2132458	7	7q11.23	CLDN4	claudin 4	1364	1.04553	0.000146576	0.000780801
ILMN_1665717	X	Xp22.11	EIF2S3	eukaryotic translation initiation factor 2 subunit gamma	1968	1.04529	1.67591e-07	2.09116e-06
ILMN_2383611	10	10q26.2	PTPRE	protein tyrosine phosphatase receptor type E	5791	1.04471	1.76298e-07	2.17695e-06
ILMN_1694194	19	19q13.33	SCAF1	SR-related CTD associated factor 1	58506	1.0445	3.63396e-05	0.000226491
ILMN_1758963	1	1p36.33	NADK	NAD kinase	65220	1.04418	1.69338e-06	1.53513e-05
ILMN_1711166	1	1p36.32	WRAP73	WD repeat containing, antisense to TP73	49856	1.04327	8.2452e-07	8.23469e-06
ILMN_1657729	19	19p12	ZNF254	zinc finger protein 254	9534	1.04279	6.61166e-07	6.77597e-06
ILMN_1701958	3	3q29	DLG1	discs large MAGUK scaffold protein 1	1739	1.04086	1.01476e-05	7.37147e-05
ILMN_2415157	2	2q11.2	ARID5A	AT-rich interaction domain 5A	10865	1.04071	9.21248e-05	0.000515935
ILMN_2390609	10	10q21.2	ANK3	ankyrin 3	288	1.04065	0.00058445	0.00266634
ILMN_2350421	19	19p13.3	CACTIN	cactin, spliceosome C complex subunit	58509	1.03968	7.54168e-08	1.04926e-06
ILMN_1690566	10	10q11.21	RASSF4	Ras association domain family member 4	83937	1.03919	9.47898e-05	0.000528884
ILMN_1682197	4	4p12	NFXL1	nuclear transcription factor, X-box binding like 1	152518	1.0388	2.89233e-07	3.32276e-06
ILMN_2381603	7	7q31.31	ING3	inhibitor of growth family member 3	54556	1.03704	1.20492e-05	8.58283e-05
ILMN_1761721	16	16q11.2	VPS35	VPS35 retromer complex component	55737	1.03669	8.00969e-08	1.10192e-06
ILMN_1671221	9	9q33.3	GAPVD1	GTPase activating protein and VPS9 domains 1	26130	1.03636	1.75379e-05	0.000119446
ILMN_1787831	19	19p13.3	ODF3L2	outer dense fiber of sperm tails 3 like 2	284451	1.03618	4.13794e-05	0.00025425
ILMN_2397750	1	1q25.3	IVNS1ABP	influenza virus NS1A binding protein	10625	1.03598	2.90971e-06	2.47814e-05
ILMN_1789955	6	6q15	PNRC1	proline rich nuclear receptor coactivator 1	10957	1.03579	3.26682e-05	0.000206163
ILMN_1712632	2	2p23.1	XDH	xanthine dehydrogenase	7498	1.03533	7.44572e-06	5.6144e-05
ILMN_1655429	17	17q11.2	TNFAIP1	TNF alpha induced protein 1	7126	1.03511	1.40591e-07	1.80187e-06
ILMN_1692260	17	17q25.3	MAFG	MAF bZIP transcription factor G	4097	1.03325	8.60414e-08	1.1733e-06
ILMN_1651513	5	5q11.2	MTREX	Mtr4 exosome RNA helicase	23517	1.03301	4.22681e-07	4.58683e-06
ILMN_1772208	11	11q13.1	CCDC88B	coiled-coil domain containing 88B	283234	1.03255	1.58229e-05	0.000108949
ILMN_1657754	1	1p22.1	RPAP2	RNA polymerase II associated protein 2	79871	1.03242	8.88793e-06	6.55725e-05
ILMN_1734153	X	Xq28	GDI1	GDP dissociation inhibitor 1	2664	1.03205	7.86681e-07	7.91179e-06
ILMN_1751028	11	11q13.5	SERPINH1	serpin family H member 1	871	1.03121	1.22915e-07	1.6003e-06
ILMN_1810176	6	6q15	MAP3K7	mitogen-activated protein kinase kinase kinase 7	6885	1.0312	1.83614e-07	2.25598e-06
ILMN_2140389	X	Xq28	TMEM185A	transmembrane protein 185A	84548	1.03104	3.34316e-07	3.76218e-06
ILMN_1809889	22	22q12.1	CCDC117	coiled-coil domain containing 117	150275	1.0307	3.37064e-07	3.78892e-06
ILMN_1730005	6	6p22.1	TRIM27	tripartite motif containing 27	5987	1.02997	1.89351e-07	2.30511e-06
ILMN_1766094	X	Xp22.2	MOSPD2	motile sperm domain containing 2	158747	1.0288	0.00041932	0.00198143
ILMN_2261784	10	10p11.21	CCNY	cyclin Y	219771	1.02857	8.39849e-07	8.36598e-06
ILMN_2349129	11	11q13.2	DPP3	dipeptidyl peptidase 3	10072	1.02791	1.25872e-08	2.3256e-07
ILMN_1727348	3	3q26.1	NMD3	NMD3 ribosome export adaptor	51068	1.02774	1.00579e-05	7.31775e-05
ILMN_2316104	3	c("3q13.33", "3q21.1")	IQCB1	IQ motif containing B1	9657	1.02755	4.84843e-08	7.20184e-07
ILMN_1757631	16	16q24.3	DBNDD1	dysbindin domain containing 1	79007	1.02575	2.76867e-05	0.000178783
ILMN_2227368	3	3q25.1	SELENOT	selenoprotein T	51714	1.02574	1.35499e-07	1.74765e-06
ILMN_2281186	5	5q13.2	ARHGEF28	Rho guanine nucleotide exchange factor 28	64283	1.02524	8.72693e-06	6.45782e-05
ILMN_1705468	3	3q26.32	PIK3CA	phosphatidylinositol-4,5-bisphosphate 3-kinase catalytic subunit alpha	5290	1.02501	0.000996454	0.00430175
ILMN_1761044	22	22q11.21	GNB1L	G protein subunit beta 1 like	54584	1.02491	4.62322e-05	0.000279976
ILMN_2305112	1	1p31.1	CTH	cystathionine gamma-lyase	1491	1.02392	9.33234e-07	9.12484e-06
ILMN_1674282	6	6p21.31	PPARD	peroxisome proliferator activated receptor delta	5467	1.02342	0.000242848	0.00121887
ILMN_1811574	16	16p13.3	MAPK8IP3	mitogen-activated protein kinase 8 interacting protein 3	23162	1.02291	0.000621481	0.00281998
ILMN_2061950	9	9q33.2-q33.3	RABGAP1	RAB GTPase activating protein 1	23637	1.02103	1.33321e-06	1.24428e-05
ILMN_1711542	8	8q21.13	CHMP4C	charged multivesicular body protein 4C	92421	1.02069	8.94326e-05	0.000502408
ILMN_2326512	11	11q22.3	CASP1	caspase 1	834	1.02068	6.60528e-07	6.77346e-06
ILMN_1813386	17	17q11.2	CORO6	coronin 6	84940	1.01837	2.55511e-06	2.20833e-05
ILMN_1751264	7	7p15.3	CCDC126	coiled-coil domain containing 126	90693	1.01833	0.000339494	0.00164388
ILMN_1811378	22	22q13.1	GTPBP1	GTP binding protein 1	9567	1.01817	5.17216e-05	0.000307918
ILMN_1701127	19	19p13.12	CC2D1A	coiled-coil and C2 domain containing 1A	54862	1.01645	1.80311e-05	0.00012237
ILMN_2153280	1	1p36.13	EMC1	ER membrane protein complex subunit 1	23065	1.01426	6.46612e-06	4.96715e-05
ILMN_1743643	3	3q21.3	ZXDC	ZXD family zinc finger C	79364	1.01422	6.37197e-06	4.91015e-05
ILMN_1727218	9	9q33.2	ZBTB6	zinc finger and BTB domain containing 6	10773	1.01417	0.000254272	0.00127048
ILMN_2245676	5	5q13.2	BTF3	basic transcription factor 3	689	1.01373	7.30989e-08	1.02072e-06
ILMN_1679318	4	4q26	ARSJ	arylsulfatase family member J	79642	1.01141	0.000214013	0.00109195
ILMN_1674706	2	2p13.1	MTHFD2	methylenetetrahydrofolate dehydrogenase (NADP+ dependent) 2, methenyltetrahydrofolate cyclohydrolase	10797	1.01112	9.03896e-07	8.89635e-06
ILMN_1815705	3	3p21.31	LZTFL1	leucine zipper transcription factor like 1	54585	1.01092	9.04338e-06	6.65342e-05
ILMN_3257884	22	22q12.3	HMGXB4	HMG-box containing 4	10042	1.01078	4.74827e-06	3.80524e-05
ILMN_1651341	2	2q21.1	NOC2LP2	NOC2 like nucleolar associated transcriptional repressor pseudogene 2	401010	1.01046	0.013838	0.0445992
ILMN_1701293	6	6q14.1	COX7A2	cytochrome c oxidase subunit 7A2	1347	1.01025	7.76622e-08	1.07357e-06
ILMN_1652082	X	Xq26.1	ELF4	E74 like ETS transcription factor 4	2000	1.00966	3.28017e-06	2.75688e-05
ILMN_2103774	9	9q34.11	PIP5KL1	phosphatidylinositol-4-phosphate 5-kinase like 1	138429	1.00951	0.000418079	0.00197665
ILMN_1783712	16	16p12.3	KNOP1	lysine rich nucleolar protein 1	400506	1.00929	4.66088e-06	3.7439e-05
ILMN_1734198	6	6q15	RNGTT	RNA guanylyltransferase and 5'-phosphatase	8732	1.00897	2.4671e-07	2.90392e-06
ILMN_1667306	16	16q22.1	RANBP10	RAN binding protein 10	57610	1.00851	4.00595e-06	3.28596e-05
ILMN_1699121	12	12p13.31	ANO2	anoctamin 2	57101	1.0082	2.48004e-05	0.000162212
ILMN_2342903	19	19p13.12	GIPC1	GIPC PDZ domain containing family member 1	10755	1.00808	0.000211706	0.00108114
ILMN_1763228	1	1q22	MEF2D	myocyte enhancer factor 2D	4209	1.008	1.42944e-06	1.32264e-05
ILMN_1765584	19	19p13.11	TMEM38A	transmembrane protein 38A	79041	1.00787	0.000186506	0.000967059
ILMN_2362902	1	1q32.1	RASSF5	Ras association domain family member 5	83593	1.00758	2.69729e-08	4.41959e-07
ILMN_1660436	6	6p21.33	HSPA1B	heat shock protein family A (Hsp70) member 1B	3304	1.00584	3.53624e-06	2.94299e-05
ILMN_1721540	19	19p13.11	NWD1	NACHT and WD repeat domain containing 1	284434	1.00556	1.6551e-05	0.000113509
ILMN_1810289	10	10q23.33	MYOF	myoferlin	26509	1.00527	1.71418e-06	1.55072e-05
ILMN_1753426	16	16p12.1	KATNIP	katanin interacting protein	23247	1.0045	1.121e-05	8.04657e-05
ILMN_1764628	1	1p36.11	LYPLA2	lysophospholipase 2	11313	1.00428	0.00035304	0.00170444
ILMN_1714327	16	16p11.2	SETD1A	SET domain containing 1A, histone lysine methyltransferase	9739	1.00423	3.87746e-07	4.27091e-06
ILMN_1654566	6	6p21.33	HSPA1L	heat shock protein family A (Hsp70) member 1 like	3305	1.00379	2.5157e-05	0.000164202
ILMN_1724598	2	2q14.1	RABL2A	RAB, member of RAS oncogene family like 2A	11159	1.00307	8.11847e-07	8.12045e-06
ILMN_2363058	10	10q26.3	PAOX	polyamine oxidase	196743	1.00245	6.3324e-06	4.88512e-05
ILMN_1692100	3	3p21.31	ZNF35	zinc finger protein 35	7584	1.00151	2.82541e-06	2.4147e-05
ILMN_1727271	14	14q32.2	WARS1	tryptophanyl-tRNA synthetase 1	7453	1.00131	1.04619e-06	1.00919e-05
ILMN_1783231	11	11q13.4	PLEKHB1	pleckstrin homology domain containing B1	58473	0.999917	2.25079e-06	1.9725e-05
ILMN_3241692	6	6p21.33	MICA	MHC class I polypeptide-related sequence A	100507436	0.999558	9.35262e-07	9.14207e-06
ILMN_3308310	22	22q13.1	SNORD139	small nucleolar RNA, C/D box 139	116936	0.999507	4.98043e-06	3.9719e-05
ILMN_1652006	X	Xp11.22	SMC1A	structural maintenance of chromosomes 1A	8243	0.9986	9.8772e-06	7.20081e-05
ILMN_1764764	19	19p13.3	PWWP3A	PWWP domain containing 3A, DNA repair factor	84939	0.998336	3.16563e-07	3.5889e-06
ILMN_1688417	12	12q24.11	MYL2	myosin light chain 2	4633	0.997911	4.45443e-06	3.60073e-05
ILMN_1777453	17	17q25.3	NPB	neuropeptide B	256933	0.996348	9.38474e-05	0.000524135
ILMN_1771987	19	19p13.2	SLC44A2	solute carrier family 44 member 2	57153	0.996081	5.06788e-07	5.37766e-06
ILMN_1668535	22	22q13.1	JOSD1	Josephin domain containing 1	9929	0.995713	4.54765e-07	4.89035e-06
ILMN_1801610	17	17q25.3	METRNL	meteorin like, glial cell differentiation regulator	284207	0.995252	7.12433e-07	7.24111e-06
ILMN_3175415	1	1q22	ASH1L-AS1	ASH1L antisense RNA 1	645676	0.995224	1.04723e-05	7.57857e-05
ILMN_2118864	2	2p14	RAB1A	RAB1A, member RAS oncogene family	5861	0.995167	5.99989e-07	6.22112e-06
ILMN_1704441	19	19p13.3	ZNF556	zinc finger protein 556	80032	0.995136	0.00174895	0.0071063
ILMN_3239568	6	6p25.2	MYLK4	myosin light chain kinase family member 4	340156	0.995039	0.00037982	0.00182327
ILMN_2406313	20	20p13	RBCK1	RANBP2-type and C3HC4-type zinc finger containing 1	10616	0.994912	5.07694e-07	5.38396e-06
ILMN_1777513	17	17p13.1	KCTD11	potassium channel tetramerization domain containing 11	147040	0.994862	0.000253777	0.00126837
ILMN_1678816	1	1q43	GREM2	gremlin 2, DAN family BMP antagonist	64388	0.994649	0.00025753	0.00128518
ILMN_1804679	16	16p11.2	KAT8	lysine acetyltransferase 8	84148	0.994102	6.77917e-07	6.925e-06
ILMN_1755909	20	20q13.33	GID8	GID complex subunit 8 homolog	54994	0.993806	6.20616e-07	6.41185e-06
ILMN_1694223	22	22q11.21	DGCR8	DGCR8 microprocessor complex subunit	54487	0.993324	7.43025e-06	5.60414e-05
ILMN_3243705	16	16p13.11	PDXDC1	pyridoxal dependent decarboxylase domain containing 1	23042	0.992754	6.1365e-08	8.78944e-07
ILMN_1814622	5	5q21.1	GIN1	gypsy retrotransposon integrase 1	54826	0.992032	1.69244e-06	1.53468e-05
ILMN_2090040	1	1p36.32	TP73-AS1	TP73 antisense RNA 1	57212	0.991412	2.75349e-05	0.000177904
ILMN_1757262	9	9p13.2	ZBTB5	zinc finger and BTB domain containing 5	9925	0.99075	5.16332e-07	5.45375e-06
ILMN_1699676	14	14q13.1	SPTSSA	serine palmitoyltransferase small subunit A	171546	0.990523	7.29923e-08	1.01964e-06
ILMN_2385688	22	22q13.33	RABL2B	RAB, member of RAS oncogene family like 2B	11158	0.990329	1.31167e-05	9.23896e-05
ILMN_1755792	12	12p11.23	STK38L	serine/threonine kinase 38 like	23012	0.990175	0.000215266	0.00109737
ILMN_1660730	X	Xq13.1	SLC7A3	solute carrier family 7 member 3	84889	0.990066	0.00016442	0.000863184
ILMN_1815051	11	11p12	API5	apoptosis inhibitor 5	8539	0.988614	1.95624e-06	1.73599e-05
ILMN_1722045	5	5q14.1	ARSB	arylsulfatase B	411	0.988441	3.08493e-05	0.000196048
ILMN_2269564	1	1q42.3	ARID4B	AT-rich interaction domain 4B	51742	0.987939	0.000878219	0.00384086
ILMN_1887731	9	9p21.3	CDKN2B-AS1	CDKN2B antisense RNA 1	100048912	0.98784	1.08874e-05	7.84022e-05
ILMN_1710312	X	Xq22.2	TMEM31	transmembrane protein 31	203562	0.987766	0.0001199	0.000653236
ILMN_2390974	2	2q35	DNAJB2	DnaJ heat shock protein family (Hsp40) member B2	3300	0.987275	6.85892e-07	7.00439e-06
ILMN_1688622	9	c("9q21.32", "9q21.2-q21.3")	UBQLN1	ubiquilin 1	29979	0.986806	9.84333e-07	9.55671e-06
ILMN_1747935	3	3q13.33	GOLGB1	golgin B1	2804	0.986665	1.12468e-06	1.07587e-05
ILMN_2325112	22	22q13.31	CDPF1	cysteine rich DPF motif domain containing 1	150383	0.986647	7.71347e-06	5.78737e-05
ILMN_1753243	3	3q27.3	DNAJB11	DnaJ heat shock protein family (Hsp40) member B11	51726	0.984862	2.12258e-07	2.54267e-06
ILMN_1809344	11	11p15.3	BTBD10	BTB domain containing 10	84280	0.984769	1.14897e-06	1.09486e-05
ILMN_2387636	20	20q11.22	EIF6	eukaryotic translation initiation factor 6	3692	0.984752	6.36655e-08	9.07372e-07
ILMN_1781526	1	1p35.3	PPP1R8	protein phosphatase 1 regulatory subunit 8	5511	0.984605	8.33105e-05	0.000471241
ILMN_1727043	19	19p13.11	COLGALT1	collagen beta(1-O)galactosyltransferase 1	79709	0.983377	9.05532e-07	8.89941e-06
ILMN_1669709	3	3q22.1	TMEM108	transmembrane protein 108	66000	0.982635	4.31899e-06	3.50521e-05
ILMN_1773154	14	14q13.2	NFKBIA	NFKB inhibitor alpha	4792	0.98253	5.63323e-07	5.88698e-06
ILMN_1795106	19	19q13.2	PSG8	pregnancy specific beta-1-glycoprotein 8	440533	0.982504	1.867e-07	2.28251e-06
ILMN_1740711	2	2q33.3	ZDBF2	zinc finger DBF-type containing 2	57683	0.982182	0.00071083	0.00318061
ILMN_1661492	9	9q34.3	ARRDC1	arrestin domain containing 1	92714	0.981703	6.14133e-05	0.000358983
ILMN_1710092	20	20q13.33	ZBTB46	zinc finger and BTB domain containing 46	140685	0.98041	9.04711e-07	8.89635e-06
ILMN_1753008	19	19p13.3	REXO1	RNA exonuclease 1 homolog	57455	0.980311	2.78756e-06	2.38589e-05
ILMN_1699317	3	3p26.3	CNTN6	contactin 6	27255	0.979602	1.53919e-06	1.41018e-05
ILMN_2117885	9	9q21.11	FAM122A	family with sequence similarity 122A	116224	0.979376	4.63284e-05	0.000280509
ILMN_1741422	14	14q23.3	FUT8	fucosyltransferase 8	2530	0.979362	1.19545e-05	8.52594e-05
ILMN_1805645	12	12q21.31	TMTC2	transmembrane O-mannosyltransferase targeting cadherins 2	160335	0.978923	0.000279198	0.00138121
ILMN_1678504	17	17q11.2	RHOT1	ras homolog family member T1	55288	0.978736	2.84772e-06	2.43075e-05
ILMN_1748529	9	9p24.1	RLN2	relaxin 2	6019	0.978272	0.00105863	0.00454074
ILMN_2226628	6	6p22.1	ZNF184	zinc finger protein 184	7738	0.976928	4.38684e-06	3.55525e-05
ILMN_1693827	3	3p25.1	GRIP2	glutamate receptor interacting protein 2	80852	0.976631	2.4804e-06	2.15077e-05
ILMN_1686610	19	19p13.3	APBA3	amyloid beta precursor protein binding family A member 3	9546	0.976284	3.09247e-08	4.95913e-07
ILMN_1763603	14	14q13.2	FAM177A1	family with sequence similarity 177 member A1	283635	0.973863	8.09882e-07	8.10729e-06
ILMN_1681998	17	17q12	AP2B1	adaptor related protein complex 2 subunit beta 1	163	0.972738	0.000122891	0.000668157
ILMN_2307740	1	1q32.2	CD46	CD46 molecule	4179	0.971757	5.57999e-07	5.84018e-06
ILMN_2124585	15	15q13.3	GREM1	gremlin 1, DAN family BMP antagonist	26585	0.971147	7.53097e-06	5.66771e-05
ILMN_1896406	X	Xp11.21	ZXDA	zinc finger X-linked duplicated A	7789	0.970468	7.41453e-05	0.000425188
ILMN_2365307	15	15q24.1	CD276	CD276 molecule	80381	0.97036	6.26029e-06	4.84032e-05
ILMN_1677226	22	22q11.21	ARVCF	ARVCF delta catenin family member	421	0.970197	5.27501e-05	0.000313446
ILMN_1677292	5	5q21.1	MACIR	macrophage immunometabolism regulator	90355	0.970036	1.66384e-05	0.000113973
ILMN_1708604	7	7p22.1	CCZ1	CCZ1 homolog, vacuolar protein trafficking and biogenesis associated	51622	0.969859	2.97979e-05	0.000190389
ILMN_3244434	4	4p14	ARAP2	ArfGAP with RhoGAP domain, ankyrin repeat and PH domain 2	116984	0.96841	6.5063e-05	0.000378137
ILMN_1779480	2	2p11.2	KCMF1	potassium channel modulatory factor 1	56888	0.96782	2.8216e-05	0.000181624
ILMN_1716480	16	16q22.1	ACD	ACD shelterin complex subunit and telomerase recruitment factor	65057	0.967351	2.17203e-06	1.9059e-05
ILMN_1723116	16	16q13	AMFR	autocrine motility factor receptor	267	0.96718	0.000461645	0.0021604
ILMN_1662795	8	8q21.2	CA2	carbonic anhydrase 2	760	0.967009	1.71309e-06	1.55015e-05
ILMN_1742400	1	1q25.2	CEP350	centrosomal protein 350	9857	0.966149	0.000600558	0.00273367
ILMN_1695334	1	1q21.3	PYGO2	pygopus family PHD finger 2	90780	0.965733	0.00160031	0.00656736
ILMN_1685574	3	3q25.1	TSC22D2	TSC22 domain family member 2	9819	0.965226	0.00057053	0.00261182
ILMN_1704972	11	11p15.4	TRIM5	tripartite motif containing 5	85363	0.964595	2.03505e-05	0.000136231
ILMN_1783448	16	16q22.1	DYNC1LI2	dynein cytoplasmic 1 light intermediate chain 2	1783	0.962918	3.77172e-07	4.17177e-06
ILMN_1718831	1	1p36.11	MACO1	macoilin 1	55219	0.961963	8.98712e-06	6.62192e-05
ILMN_1755850	19	19q13.41	ZNF350	zinc finger protein 350	59348	0.96178	3.73681e-05	0.000232085
ILMN_1794070	17	17q11.2	ANKRD13B	ankyrin repeat domain 13B	124930	0.961775	1.22202e-05	8.68847e-05
ILMN_1727402	3	3q13.33	HCLS1	hematopoietic cell-specific Lyn substrate 1	3059	0.961652	2.88093e-06	2.45605e-05
ILMN_1752741	5	5q12.3	TRIM23	tripartite motif containing 23	373	0.961435	0.00028656	0.00141438
ILMN_1685415	7	7q22.3	HBP1	HMG-box transcription factor 1	26959	0.961315	5.02842e-07	5.34236e-06
ILMN_1714461	5	5q31.3	RNF14	ring finger protein 14	9604	0.961262	1.75644e-06	1.58392e-05
ILMN_1706521	19	19p13.3	CSNK1G2	casein kinase 1 gamma 2	1455	0.961142	8.58083e-08	1.17115e-06
ILMN_1755589	12	12q13.12	DIP2B	disco interacting protein 2 homolog B	57609	0.960932	1.68662e-05	0.00011535
ILMN_1730432	1	1q23.2	IGSF8	immunoglobulin superfamily member 8	93185	0.960722	9.03381e-06	6.65122e-05
ILMN_1697962	16	16p12.1	NSMCE1	NSE1 homolog, SMC5-SMC6 complex component	197370	0.960646	2.59653e-06	2.2386e-05
ILMN_1810962	6	6q22.33	PTPRK	protein tyrosine phosphatase receptor type K	5796	0.960364	1.53121e-05	0.00010577
ILMN_1694671	7	7p22.3	ZFAND2A	zinc finger AN1-type containing 2A	90637	0.960067	2.72341e-06	2.33679e-05
ILMN_1756146	X	Xp11.23	WDR45	WD repeat domain 45	11152	0.958741	1.16045e-05	8.30555e-05
ILMN_1796244	16	16p11.2	CD2BP2	CD2 cytoplasmic tail binding protein 2	10421	0.958283	2.00313e-08	3.41037e-07
ILMN_2376455	c("X", "Y")	c("Xp22.32", "Yp11.3")	CSF2RA	colony stimulating factor 2 receptor subunit alpha	1438	0.958118	1.30742e-05	9.21207e-05
ILMN_1712657	17	17q24.2	BPTF	bromodomain PHD finger transcription factor	2186	0.957754	0.00025665	0.00128124
ILMN_1917290	X	Xq24	LAMP2	lysosomal associated membrane protein 2	3920	0.957218	2.88358e-05	0.000184991
ILMN_2137464	3	3q27.1	DVL3	dishevelled segment polarity protein 3	1857	0.95718	9.46426e-06	6.93054e-05
ILMN_1672287	3	3q26.2	MYNN	myoneurin	55892	0.957031	6.95106e-06	5.29368e-05
ILMN_1731299	15	15q24.1	PML	PML nuclear body scaffold	5371	0.956417	0.000242265	0.00121648
ILMN_1700001	3	3p21.31	TCTA	T cell leukemia translocation altered	6988	0.955647	8.504e-05	0.000479921
ILMN_1780894	2	2p13.3	ANTXR1	ANTXR cell adhesion molecule 1	84168	0.955278	6.36631e-05	0.000370627
ILMN_1674941	12	12q12	ANO6	anoctamin 6	196527	0.955218	2.31063e-06	2.01981e-05
ILMN_1727798	X	Xq26.3	MOSPD1	motile sperm domain containing 1	56180	0.954815	4.47302e-06	3.61321e-05
ILMN_1801226	19	19p13.2	DOCK6	dedicator of cytokinesis 6	57572	0.954291	3.73252e-06	3.08369e-05
ILMN_1669572	19	19p13.3	RNF126	ring finger protein 126	55658	0.954013	8.1529e-05	0.000461846
ILMN_2166275	17	17q25.3	NOTUM	notum, palmitoleoyl-protein carboxylesterase	147111	0.953873	4.02663e-05	0.000247852
ILMN_3234997	1	1p34.3	MAP7D1	MAP7 domain containing 1	55700	0.953693	3.16802e-05	0.000200479
ILMN_1671844	6	6q23.2	EYA4	EYA transcriptional coactivator and phosphatase 4	2070	0.953026	0.000362746	0.00174788
ILMN_1782377	16	16p11.2	SMG1P2	SMG1 pseudogene 2	440354	0.952673	2.74972e-07	3.17692e-06
ILMN_1788203	8	8q21.13	HEY1	hes related family bHLH transcription factor with YRPW motif 1	23462	0.95141	0.000126051	0.000682864
ILMN_1798288	1	1p33	MOB3C	MOB kinase activator 3C	148932	0.951103	2.54147e-07	2.97622e-06
ILMN_1755737	22	22q13.33	TRABD	TraB domain containing	80305	0.950923	1.85155e-07	2.26845e-06
ILMN_1716658	19	19q13.43	ZNF543	zinc finger protein 543	125919	0.950879	0.000364975	0.00175739
ILMN_1761968	19	19q13.2	PPP1R14A	protein phosphatase 1 regulatory inhibitor subunit 14A	94274	0.950031	7.21701e-05	0.000414758
ILMN_1786021	1	1q21.1	PRKAB2	protein kinase AMP-activated non-catalytic subunit beta 2	5565	0.950014	2.53056e-05	0.000164922
ILMN_1738750	12	12q13.12-q13.13	TFCP2	transcription factor CP2	7024	0.949926	5.96978e-06	4.64697e-05
ILMN_1773567	20	20q13.33	LAMA5	laminin subunit alpha 5	3911	0.949782	1.91266e-06	1.7017e-05
ILMN_3243461	20	20q11.23	RPRD1B	regulation of nuclear pre-mRNA domain containing 1B	58490	0.949552	5.86506e-05	0.000344822
ILMN_1708987	19	19p13.3	HSD11B1L	hydroxysteroid 11-beta dehydrogenase 1 like	374875	0.949527	2.94757e-06	2.50853e-05
ILMN_1765851	16	16q22.1	TRADD	TNFRSF1A associated via death domain	8717	0.949326	1.74921e-06	1.57868e-05
ILMN_1735679	16	16q22.2	DHX38	DEAH-box helicase 38	9785	0.948923	0.000143716	0.000767583
ILMN_1749641	11	11p13	FBXO3	F-box protein 3	26273	0.948463	1.93067e-06	1.71595e-05
ILMN_1788059	10	10q23.32	PCGF5	polycomb group ring finger 5	84333	0.947231	0.000149629	0.000795433
ILMN_1803889	16	16p13.3	BICDL2	BICD family like cargo adaptor 2	146439	0.947082	3.97167e-06	3.2625e-05
ILMN_1778161	9	9q31.3	DNAJC25	DnaJ heat shock protein family (Hsp40) member C25	548645	0.947075	8.21355e-06	6.11731e-05
ILMN_1689831	5	5q22.2	EPB41L4A-DT	EPB41L4A divergent transcript	54508	0.946533	0.000230414	0.00116443
ILMN_1757847	11	11q13.1	C11orf68	chromosome 11 open reading frame 68	83638	0.945696	5.73616e-06	4.49454e-05
ILMN_1726456	11	11q12.3	SLC3A2	solute carrier family 3 member 2	6520	0.944754	1.73795e-07	2.15299e-06
ILMN_1679520	6	6p21.32	AGPAT1	1-acylglycerol-3-phosphate O-acyltransferase 1	10554	0.944396	1.79431e-07	2.21168e-06
ILMN_1786882	10	10q11.23	ERCC6	ERCC excision repair 6, chromatin remodeling factor	2074	0.943527	1.38309e-05	9.67403e-05
ILMN_1770127	16	16q11.2	DNAJA2	DnaJ heat shock protein family (Hsp40) member A2	10294	0.942797	3.32704e-05	0.000209274
ILMN_1809245	22	22q12.1	PITPNB	phosphatidylinositol transfer protein beta	23760	0.942488	8.32181e-07	8.29918e-06
ILMN_1756439	7	7p14.3	SCRN1	secernin 1	9805	0.942217	1.8098e-07	2.22838e-06
ILMN_1797046	16	16q24.1	MTHFSD	methenyltetrahydrofolate synthetase domain containing	64779	0.941497	0.000148896	0.00079206
ILMN_1690911	16	16q11.2	C16orf87	chromosome 16 open reading frame 87	388272	0.940666	0.000320962	0.0015643
ILMN_1738530	1	1p36.33	ATAD3A	ATPase family AAA domain containing 3A	55210	0.940337	2.21129e-05	0.000146467
ILMN_2365569	7	7p21.3	ICA1	islet cell autoantigen 1	3382	0.93947	3.85501e-07	4.25297e-06
ILMN_2068747	10	10q26.13	OAT	ornithine aminotransferase	4942	0.938903	1.78597e-06	1.6043e-05
ILMN_2357062	3	3q28	IL1RAP	interleukin 1 receptor accessory protein	3556	0.938724	1.56881e-05	0.000108086
ILMN_1767894	8	8p11.21	POLB	DNA polymerase beta	5423	0.938327	4.12397e-07	4.48652e-06
ILMN_1789384	9	9q34.3	QSOX2	quiescin sulfhydryl oxidase 2	169714	0.937194	1.22604e-07	1.59807e-06
ILMN_1759008	16	16p11.2	ZNF689	zinc finger protein 689	115509	0.936946	7.03952e-06	5.34334e-05
ILMN_2332105	6	6p25.2	WRNIP1	WRN helicase interacting protein 1	56897	0.935622	3.66386e-06	3.03424e-05
ILMN_2379130	X	Xq28	IRAK1	interleukin 1 receptor associated kinase 1	3654	0.935284	4.22254e-05	0.000258664
ILMN_1745784	19	19q13.43	ZNF324	zinc finger protein 324	25799	0.932719	4.91091e-07	5.22719e-06
ILMN_2257833	4	4q27	BBS7	Bardet-Biedl syndrome 7	55212	0.932465	4.2714e-06	3.46986e-05
ILMN_1772821	22	22q11.23	KIAA1671	KIAA1671	85379	0.932173	7.55645e-06	5.68564e-05
ILMN_1677785	19	19p13.2	ZNF559	zinc finger protein 559	84527	0.931327	3.02698e-05	0.00019297
ILMN_2337492	11	11q13.2	RCE1	Ras converting CAAX endopeptidase 1	9986	0.930963	5.90182e-05	0.000346747
ILMN_1713454	19	19q13.43	ZNF671	zinc finger protein 671	79891	0.930568	0.000505984	0.00234435
ILMN_3178792	7	7p15.2	HNRNPA2B1	heterogeneous nuclear ribonucleoprotein A2/B1	3181	0.930506	3.38311e-06	2.83097e-05
ILMN_1700811	16	16p12.2	UBFD1	ubiquitin family domain containing 1	56061	0.92913	7.65283e-06	5.74812e-05
ILMN_1787595	3	3q26.1	B3GALNT1	beta-1,3-N-acetylgalactosaminyltransferase 1 (globoside blood group)	8706	0.92883	4.16986e-05	0.000255938
ILMN_1720053	6	6p21.2	ZFAND3	zinc finger AN1-type containing 3	60685	0.928509	2.70096e-07	3.13321e-06
ILMN_2119774	11	11p15.2	CYP2R1	cytochrome P450 family 2 subfamily R member 1	120227	0.927786	2.95427e-06	2.51298e-05
ILMN_1685275	11	11q23.3	MCAM	melanoma cell adhesion molecule	4162	0.927155	6.74831e-06	5.15979e-05
ILMN_1796430	17	17q21.1	PSMD3	proteasome 26S subunit, non-ATPase 3	5709	0.926754	4.59904e-05	0.000278658
ILMN_1724811	16	16p13.12	PARN	poly(A)-specific ribonuclease	5073	0.926299	4.17653e-06	3.40161e-05
ILMN_2124155	3	3q26.33	ATP11B	ATPase phospholipid transporting 11B (putative)	23200	0.925246	6.45973e-05	0.000375684
ILMN_1698551	11	11p13	RCN1	reticulocalbin 1	5954	0.925096	3.75059e-05	0.000232773
ILMN_1814315	1	1q21.3	PBXIP1	PBX homeobox interacting protein 1	57326	0.924851	2.29231e-05	0.000151253
ILMN_1783815	16	16p12.2	COG7	component of oligomeric golgi complex 7	91949	0.924097	2.99609e-05	0.000191319
ILMN_1753393	14	14q11.2	OSGEP	O-sialoglycoprotein endopeptidase	55644	0.923575	7.6221e-08	1.05661e-06
ILMN_1751898	12	12p13.32	C12orf4	chromosome 12 open reading frame 4	57102	0.923149	1.40037e-05	9.77512e-05
ILMN_1800447	16	16q12.1	PHKB	phosphorylase kinase regulatory subunit beta	5257	0.922725	1.69625e-05	0.000115917
ILMN_1748488	16	16q22.2	TXNL4B	thioredoxin like 4B	54957	0.922615	0.000101832	0.000563342
ILMN_1735361	22	22q13.33	MAPK11	mitogen-activated protein kinase 11	5600	0.921826	0.000241999	0.00121584
ILMN_1666206	17	17q21.1	GSDMB	gasdermin B	55876	0.921204	2.99784e-05	0.000191395
ILMN_1672461	19	19p13.3	SPPL2B	signal peptide peptidase like 2B	56928	0.920706	2.57395e-05	0.000167528
ILMN_1675669	6	6q14.1	IBTK	inhibitor of Bruton tyrosine kinase	25998	0.920669	1.27582e-06	1.20014e-05
ILMN_1780671	14	14q23.3	PLEKHG3	pleckstrin homology and RhoGEF domain containing G3	26030	0.920585	1.14695e-06	1.09324e-05
ILMN_2376194	7	7p13	CAMK2B	calcium/calmodulin dependent protein kinase II beta	816	0.919606	0.000117944	0.000644003
ILMN_1843932	5	5q33.2	SAP30L	SAP30 like	79685	0.919479	1.26945e-05	8.98827e-05
ILMN_1761409	3	3p21.31	ZKSCAN7	zinc finger with KRAB and SCAN domains 7	55888	0.91871	3.68177e-06	3.04674e-05
ILMN_2370685	6	6p21.31	SMIM29	small integral membrane protein 29	221491	0.918679	5.07729e-05	0.000303201
ILMN_1723007	5	5q14.1	ZCCHC9	zinc finger CCHC-type containing 9	84240	0.918599	3.13088e-06	2.64368e-05
ILMN_1814002	6	6p21.31	TEAD3	TEA domain transcription factor 3	7005	0.917412	0.00176096	0.00714665
ILMN_1733305	3	3q25.1	EIF2A	eukaryotic translation initiation factor 2A	83939	0.916915	1.6073e-06	1.46674e-05
ILMN_2344373	16	16p11.2	MVP	major vault protein	9961	0.916728	2.0791e-06	1.83322e-05
ILMN_1747244	4	4q21.1	CCNG2	cyclin G2	901	0.91652	4.01449e-06	3.29062e-05
ILMN_1736042	6	6q14.2	ME1	malic enzyme 1	4199	0.916145	3.43634e-05	0.00021552
ILMN_1693683	7	7q22.1	PDAP1	PDGFA associated protein 1	11333	0.915369	1.89726e-05	0.00012823
ILMN_1781867	2	2q14.1	FOXD4L1	forkhead box D4 like 1	200350	0.914766	1.04792e-05	7.5804e-05
ILMN_1800179	22	22q13.1	KCNJ4	potassium inwardly rectifying channel subfamily J member 4	3761	0.914409	2.76668e-05	0.000178689
ILMN_1678707	17	17q12	TAF15	TATA-box binding protein associated factor 15	8148	0.913926	5.84875e-05	0.00034404
ILMN_2184708	11	11p14.1	LIN7C	lin-7 homolog C, crumbs cell polarity complex component	55327	0.913893	0.00023568	0.00118808
ILMN_1716733	8	8p23.3	MYOM2	myomesin 2	9172	0.912885	6.53997e-06	5.01494e-05
ILMN_2211189	9	9q31.3	ELP1	elongator complex protein 1	8518	0.912598	1.79753e-06	1.61259e-05
ILMN_1797277	2	2p23.3	KIF3C	kinesin family member 3C	3797	0.912234	0.000110429	0.000606332
ILMN_1755643	2	2q11.2	MGAT4A	alpha-1,3-mannosyl-glycoprotein 4-beta-N-acetylglucosaminyltransferase A	11320	0.911236	2.34391e-06	2.04631e-05
ILMN_1697802	1	1p36.22	SLC25A33	solute carrier family 25 member 33	84275	0.911164	2.44372e-07	2.87837e-06
ILMN_2396947	17	17q21.2	PSMC3IP	PSMC3 interacting protein	29893	0.910953	0.000105997	0.000583666
ILMN_1723021	1	1p36.31	ICMT	isoprenylcysteine carboxyl methyltransferase	23463	0.910924	1.7969e-06	1.61244e-05
ILMN_1806758	9	9q21.13	C9orf85	chromosome 9 open reading frame 85	138241	0.910568	9.3033e-05	0.000520091
ILMN_2361570	6	6q14.3	SNX14	sorting nexin 14	57231	0.910425	3.04713e-06	2.57925e-05
ILMN_1675106	19	19p13.2	YIPF2	Yip1 domain family member 2	78992	0.910394	0.000867957	0.00380031
ILMN_1797342	9	9q34.11	FNBP1	formin binding protein 1	23048	0.91031	7.66109e-06	5.75307e-05
ILMN_2214197	8	8q22.1	TP53INP1	tumor protein p53 inducible nuclear protein 1	94241	0.909808	5.55955e-07	5.82587e-06
ILMN_1672547	19	19p13.11	MYO9B	myosin IXB	4650	0.909765	3.81624e-06	3.14682e-05
ILMN_1669607	16	16p11.2	PHKG2	phosphorylase kinase catalytic subunit gamma 2	5261	0.909667	1.95959e-05	0.000131719
ILMN_1706553	1	1q25.3	SMG7	SMG7 nonsense mediated mRNA decay factor	9887	0.909201	6.03642e-06	4.6872e-05
ILMN_1753890	17	17q11.2	IFT20	intraflagellar transport 20	90410	0.908776	1.19915e-06	1.13452e-05
ILMN_3241257	16	16p12.2	POLR3E	RNA polymerase III subunit E	55718	0.908471	1.18279e-05	8.44262e-05
ILMN_1785768	19	19p13.2	PDE4A	phosphodiesterase 4A	5141	0.907942	4.71231e-05	0.000284671
ILMN_2062754	5	5q31.3	SRA1	steroid receptor RNA activator 1	10011	0.907567	1.83971e-05	0.000124683
ILMN_1695041	18	18q11.2	GATA6	GATA binding protein 6	2627	0.907503	0.00027558	0.00136527
ILMN_2112755	16	16q24.1	HSDL1	hydroxysteroid dehydrogenase like 1	83693	0.906838	7.07988e-07	7.21058e-06
ILMN_1739450	17	17q21.32	NFE2L1	nuclear factor, erythroid 2 like 1	4779	0.906618	2.34742e-06	2.04784e-05
ILMN_1756542	19	19q13.33	TBC1D17	TBC1 domain family member 17	79735	0.906164	0.000161017	0.000847257
ILMN_1673108	19	19q13.33	AP2A1	adaptor related protein complex 2 subunit alpha 1	160	0.905667	8.56607e-05	0.00048295
ILMN_1802708	6	6p22.2	BTN3A1	butyrophilin subfamily 3 member A1	11119	0.905568	9.52195e-06	6.96983e-05
ILMN_1798817	16	16q23.3	SDR42E1	short chain dehydrogenase/reductase family 42E, member 1	93517	0.905448	4.43783e-05	0.00027022
ILMN_1699562	8	8q11.21	EFCAB1	EF-hand calcium binding domain 1	79645	0.905404	1.12292e-05	8.05699e-05
ILMN_1651799	12	12q13.11	SLC38A2	solute carrier family 38 member 2	54407	0.904569	5.25547e-06	4.15568e-05
ILMN_1675956	1	1q42.3	LYST	lysosomal trafficking regulator	1130	0.904412	0.000182156	0.00094664
ILMN_1739594	1	1p32.3	ACOT11	acyl-CoA thioesterase 11	26027	0.90427	5.77102e-06	4.51739e-05
ILMN_1714278	9	9q31.1	MSANTD3	Myb/SANT DNA binding domain containing 3	91283	0.903975	6.34843e-05	0.000369835
ILMN_1771376	1	1q23.2	PEA15	proliferation and apoptosis adaptor protein 15	8682	0.903952	1.02822e-07	1.3708e-06
ILMN_1808059	20	20q13.13	BCAS4	breast carcinoma amplified sequence 4	55653	0.902851	2.64965e-07	3.08404e-06
ILMN_1708891	4	4q12	SCFD2	sec1 family domain containing 2	152579	0.902692	0.000347391	0.00167952
ILMN_1712914	19	19p13.3	SEMA6B	semaphorin 6B	10501	0.902621	1.15538e-06	1.10005e-05
ILMN_1737964	9	9q22.32	MFSD14B	major facilitator superfamily domain containing 14B	84641	0.902437	3.00895e-05	0.000191986
ILMN_1794187	13	13q22.3	FBXL3	F-box and leucine rich repeat protein 3	26224	0.902356	3.14046e-06	2.65098e-05
ILMN_1700690	17	17q21.31	VAT1	vesicle amine transport 1	10493	0.902088	2.15314e-05	0.000143104
ILMN_2400661	19	19p12	ZNF626	zinc finger protein 626	199777	0.900587	2.2808e-05	0.000150609
ILMN_1789436	1	1q31.3	DENND1B	DENN domain containing 1B	163486	0.900137	4.51599e-05	0.000274495
ILMN_1736078	5	5q14.1	THBS4	thrombospondin 4	7060	0.89983	0.000124732	0.0006771
ILMN_1739558	3	3p25.3	CRELD1	cysteine rich with EGF like domains 1	78987	0.899697	2.00311e-07	2.41804e-06
ILMN_2082244	7	7p22.1	FOXK1	forkhead box K1	221937	0.899278	8.79746e-06	6.50024e-05
ILMN_1720158	21	21q22.2	ETS2	ETS proto-oncogene 2, transcription factor	2114	0.898769	1.07442e-05	7.7509e-05
ILMN_1724718	2	2q12.2	NCK2	NCK adaptor protein 2	8440	0.897358	1.15181e-05	8.24882e-05
ILMN_1759983	1	1p22.1	DR1	down-regulator of transcription 1	1810	0.897108	0.000231637	0.00116993
ILMN_2375879	6	6p21.1	VEGFA	vascular endothelial growth factor A	7422	0.895603	3.67561e-05	0.000228778
ILMN_1659411	16	16q21	POLR2C	RNA polymerase II subunit C	5432	0.895431	1.49304e-05	0.000103403
ILMN_1785988	5	5q32	CSNK1A1	casein kinase 1 alpha 1	1452	0.895015	1.28146e-05	9.05876e-05
ILMN_1745962	22	22q12.3	FBXO7	F-box protein 7	25793	0.89449	5.77477e-06	4.51761e-05
ILMN_1797822	4	4p15.2	SEL1L3	SEL1L family member 3	23231	0.894317	1.47249e-06	1.3553e-05
ILMN_3244029	12	12q13.3	ANKRD52	ankyrin repeat domain 52	283373	0.894075	0.00010105	0.000559467
ILMN_1794239	4	4q21.1	ODAPH	odontogenesis associated phosphoprotein	152816	0.893995	1.61869e-05	0.00011119
ILMN_1685109	8	8p21.3	POLR3D	RNA polymerase III subunit D	661	0.893769	0.000998674	0.00430971
ILMN_1688534	3	3q27.1	EIF2B5	eukaryotic translation initiation factor 2B subunit epsilon	8893	0.893499	1.90328e-05	0.000128511
ILMN_3241750	5	5q31.1	CCNI2	cyclin I family member 2	645121	0.893168	0.0185676	0.0577322
ILMN_1755173	19	19q13.33	PLEKHA4	pleckstrin homology domain containing A4	57664	0.89256	2.73781e-06	2.34856e-05
ILMN_2050654	14	14q22.1	SAV1	salvador family WW domain containing protein 1	60485	0.891898	1.03829e-05	7.52335e-05
ILMN_1728060	7	7q34	KIAA1549	KIAA1549	57670	0.890722	0.00101789	0.00438494
ILMN_1666449	17	17q21.2	RETREG3	reticulophagy regulator family member 3	162427	0.890363	3.38129e-05	0.000212415
ILMN_1672486	10	10q25.2-q25.3	TCF7L2	transcription factor 7 like 2	6934	0.890109	0.00562763	0.0201076
ILMN_1656066	19	19p13.13	TNPO2	transportin 2	30000	0.889443	1.16582e-05	8.3353e-05
ILMN_1709026	6	6p25.2	PXDC1	PX domain containing 1	221749	0.889438	9.06205e-05	0.00050817
ILMN_1796316	20	20q13.12	MMP9	matrix metallopeptidase 9	4318	0.889225	8.47593e-05	0.000478494
ILMN_1742427	13	13q12.2	POLR1D	RNA polymerase I and III subunit D	51082	0.889109	4.4068e-06	3.56808e-05
ILMN_1788213	10	10q24.1	FRAT2	FRAT regulator of WNT signaling pathway 2	23401	0.888943	0.000132659	0.000715509
ILMN_1692706	13	13q34	DCUN1D2	defective in cullin neddylation 1 domain containing 2	55208	0.888409	0.00010636	0.000585577
ILMN_2269193	19	19q13.42	ZNF331	zinc finger protein 331	55422	0.887971	0.000702624	0.00314961
ILMN_1703881	X	Xp22.33	LOC389906	zinc finger protein 839 pseudogene	389906	0.885684	0.00051162	0.00236664
ILMN_1696276	19	19p13.2	ZNF653	zinc finger protein 653	115950	0.884564	7.48552e-07	7.57694e-06
ILMN_1731070	16	16q11.2	ORC6	origin recognition complex subunit 6	23594	0.884434	1.50461e-05	0.0001041
ILMN_1656826	4	4q32.3-q33	SH3RF1	SH3 domain containing ring finger 1	57630	0.884099	0.000453163	0.0021259
ILMN_2339748	3	3q25.1	RNF13	ring finger protein 13	11342	0.883964	1.19758e-05	8.53762e-05
ILMN_1676899	3	3q27.1	YEATS2	YEATS domain containing 2	55689	0.883228	1.79641e-05	0.000121988
ILMN_3240092	11	11q21	MED17	mediator complex subunit 17	9440	0.883104	1.98516e-06	1.75759e-05
ILMN_1752967	19	19p13.13	DHPS	deoxyhypusine synthase	1725	0.882692	5.314e-07	5.58724e-06
ILMN_1742705	17	17q24.3-q25.1	SLC39A11	solute carrier family 39 member 11	201266	0.882469	1.34927e-05	9.46439e-05
ILMN_1763137	9	9q31.1	INVS	inversin	27130	0.880704	0.000225777	0.00114385
ILMN_1706845	X	Xq12	OPHN1	oligophrenin 1	4983	0.880652	0.00109957	0.00469458
ILMN_1688515	11	11p15.4	ZNF195	zinc finger protein 195	7748	0.880029	5.10504e-05	0.000304448
ILMN_1766408	16	16q22.1	CBFB	core-binding factor subunit beta	865	0.878532	6.14313e-06	4.76041e-05
ILMN_1772316	7	7p22.3	SUN1	Sad1 and UNC84 domain containing 1	23353	0.878462	1.06688e-05	7.70461e-05
ILMN_1664921	9	9q33.3	PPP6C	protein phosphatase 6 catalytic subunit	5537	0.878134	6.43807e-07	6.61774e-06
ILMN_2396571	19	19p13.3	GPR108	G protein-coupled receptor 108	56927	0.877981	4.02559e-06	3.29893e-05
ILMN_1769412	9	9q34.13	RAPGEF1	Rap guanine nucleotide exchange factor 1	2889	0.877889	5.1663e-07	5.45524e-06
ILMN_1725760	5	5q22.2	YTHDC2	YTH domain containing 2	64848	0.877623	0.000196468	0.00101187
ILMN_1748481	17	17q11.2	TMEM199	transmembrane protein 199	147007	0.876954	4.86844e-05	0.000292616
ILMN_1690807	16	16p13.12	MRTFB	myocardin related transcription factor B	57496	0.876282	0.000262079	0.00130494
ILMN_1789405	22	22q11.21	TANGO2	transport and golgi organization 2 homolog	128989	0.875917	0.000327727	0.00159406
ILMN_1657771	1	1q21.3	CRTC2	CREB regulated transcription coactivator 2	200186	0.873498	0.000982393	0.00425116
ILMN_1778560	7	7q22.1	ZNF3	zinc finger protein 3	7551	0.873349	0.000384989	0.00184192
ILMN_1784577	7	7p22.1	ZNF12	zinc finger protein 12	7559	0.872961	0.000857655	0.00375807
ILMN_1655780	10	10q26.13	EEF1AKMT2	EEF1A lysine methyltransferase 2	399818	0.872423	0.00232061	0.0091372
ILMN_1814156	9	9q33.3	PSMB7	proteasome 20S subunit beta 7	5695	0.872307	1.31938e-06	1.23472e-05
ILMN_2389013	20	20q13.33	ADRM1	adhesion regulating molecule 1	11047	0.872151	3.31021e-06	2.77874e-05
ILMN_1731113	9	9q33.3	ZBTB43	zinc finger and BTB domain containing 43	23099	0.871922	0.00221461	0.00876288
ILMN_2388585	6	6q22.1	GOPC	golgi associated PDZ and coiled-coil motif containing	57120	0.870945	5.28551e-07	5.56237e-06
ILMN_1800331	9	9q22.32	PTCH1	patched 1	5727	0.870728	0.000389873	0.0018609
ILMN_1736327	2	2p22.2	CDC42EP3	CDC42 effector protein 3	10602	0.87041	7.14771e-05	0.000411119
ILMN_2173291	1	1p33	CYP4B1	cytochrome P450 family 4 subfamily B member 1	1580	0.870134	3.295e-06	2.76732e-05
ILMN_1695356	16	16q24.2-q24.3	RNF166	ring finger protein 166	115992	0.869742	3.80276e-05	0.000235714
ILMN_1727099	10	10q23.31	FLJ37201	tigger transposable element derived 2 pseudogene	283011	0.869621	0.000141303	0.000756924
ILMN_1738971	10	10q22.2	USP54	ubiquitin specific peptidase 54	159195	0.869301	0.000606686	0.0027572
ILMN_1742456	9	9q21.13	OSTF1	osteoclast stimulating factor 1	26578	0.868739	0.000140596	0.000753842
ILMN_1802888	X	Xq28	ZNF185	zinc finger protein 185 with LIM domain	7739	0.868505	1.04017e-05	7.53542e-05
ILMN_2366714	22	22q12.2	UQCR10	ubiquinol-cytochrome c reductase, complex III subunit X	29796	0.868357	3.93523e-07	4.31935e-06
ILMN_1791067	9	9p13.3	TESK1	testis associated actin remodelling kinase 1	7016	0.867791	2.58047e-07	3.01573e-06
ILMN_1653719	13	13q33.1	ITGBL1	integrin subunit beta like 1	9358	0.867729	0.000709661	0.00317579
ILMN_1672807	X	Xp22.2	CA5B	carbonic anhydrase 5B	11238	0.867136	0.000241703	0.00121454
ILMN_1799836	7	7p15.2	HOXA2	homeobox A2	3199	0.866943	1.54514e-05	0.000106562
ILMN_1813491	9	9q22.31	SPTLC1	serine palmitoyltransferase long chain base subunit 1	10558	0.866603	1.47667e-07	1.87444e-06
ILMN_1776516	15	15q15.1	ITPKA	inositol-trisphosphate 3-kinase A	3706	0.866405	2.77727e-06	2.37886e-05
ILMN_1692698	1	1q32.3	VASH2	vasohibin 2	79805	0.866152	7.98299e-05	0.000453189
ILMN_2347888	12	12q13.12	LARP4	La ribonucleoprotein 4	113251	0.866113	5.50205e-05	0.000325534
ILMN_1664756	3	3q25.33	KPNA4	karyopherin subunit alpha 4	3840	0.865547	1.82614e-06	1.63357e-05
ILMN_1697864	X	Xp11.4	CXorf38	chromosome X open reading frame 38	159013	0.865093	0.000590501	0.00269251
ILMN_1694058	6	6p22.1	IFITM4P	interferon induced transmembrane protein 4 pseudogene	340198	0.864697	4.19546e-05	0.000257142
ILMN_1652736	X	Xp22.12	RPS6KA3	ribosomal protein S6 kinase A3	6197	0.864394	0.00173498	0.00705449
ILMN_1754220	19	19p13.3	SF3A2	splicing factor 3a subunit 2	8175	0.863472	0.000279906	0.00138431
ILMN_1781816	20	20q12	CHD6	chromodomain helicase DNA binding protein 6	84181	0.862689	1.32774e-05	9.33238e-05
ILMN_1654392	14	14q12	KHNYN	KH and NYN domain containing	23351	0.862428	1.85536e-06	1.65713e-05
ILMN_2204545	11	11q24.2	ST3GAL4	ST3 beta-galactoside alpha-2,3-sialyltransferase 4	6484	0.86232	1.96119e-05	0.000131801
ILMN_2344988	7	7q22.3	KMT2E	lysine methyltransferase 2E (inactive)	55904	0.861609	0.00245771	0.00961878
ILMN_1652313	22	22q12.2	RNF215	ring finger protein 215	200312	0.861173	0.00024839	0.00124488
ILMN_1771135	16	16p12.1	ZKSCAN2	zinc finger with KRAB and SCAN domains 2	342357	0.861108	9.76988e-05	0.000543093
ILMN_1780773	12	12q12	LINC00938	long intergenic non-protein coding RNA 938	400027	0.861017	3.26534e-06	2.74575e-05
ILMN_1757914	19	19p13.13	WDR83OS	WD repeat domain 83 opposite strand	51398	0.859537	4.11129e-06	3.3572e-05
ILMN_1665865	17	17q21.2	IGFBP4	insulin like growth factor binding protein 4	3487	0.859202	0.000625145	0.00283511
ILMN_1795835	12	12q21.33	ATP2B1-AS1	ATP2B1 antisense RNA 1	338758	0.859056	0.000633458	0.0028713
ILMN_1659843	13	13q32.1	DNAJC3	DnaJ heat shock protein family (Hsp40) member C3	5611	0.858582	5.60581e-05	0.000330991
ILMN_1727553	5	5q33.3	ZBED8	zinc finger BED-type containing 8	63920	0.858556	8.20342e-05	0.000464326
ILMN_2134855	X	Xq13.1	PIN4	peptidylprolyl cis/trans isomerase, NIMA-interacting 4	5303	0.858467	1.18763e-06	1.1264e-05
ILMN_2375599	11	11p15.5	RNH1	ribonuclease/angiogenin inhibitor 1	6050	0.858393	1.28897e-05	9.09696e-05
ILMN_1664175	1	1q24.3	VAMP4	vesicle associated membrane protein 4	8674	0.857339	1.32206e-05	9.29618e-05
ILMN_1672811	1	1p36.33	C1orf159	chromosome 1 open reading frame 159	54991	0.856515	7.58002e-06	5.70089e-05
ILMN_1679949	19	19p13.3	SLC25A23	solute carrier family 25 member 23	79085	0.856346	5.75181e-06	4.50578e-05
ILMN_2075927	1	1p34.3	STK40	serine/threonine kinase 40	83931	0.856167	6.99564e-06	5.31706e-05
ILMN_2187533	12	12q13.12	CSRNP2	cysteine and serine rich nuclear protein 2	81566	0.855766	6.91648e-07	7.05601e-06
ILMN_3236373	3	3q22.3	MSL2	MSL complex subunit 2	55167	0.855547	1.28335e-05	9.06687e-05
ILMN_1682206	7	7q32.1	GCC1	GRIP and coiled-coil domain containing 1	79571	0.855255	9.31345e-07	9.11413e-06
ILMN_1743316	12	12q24.12	PHETA1	PH domain containing endocytic trafficking adaptor 1	144717	0.85477	0.000192427	0.00099298
ILMN_1658607	1	1p31.3	DLEU2L	deleted in lymphocytic leukemia 2 like	79469	0.854637	4.36289e-05	0.000266174
ILMN_1657550	16	16q24.2	MVD	mevalonate diphosphate decarboxylase	4597	0.854223	6.53589e-06	5.01405e-05
ILMN_1805590	7	7q31.31	LSM8	LSM8 homolog, U6 small nuclear RNA associated	51691	0.853714	0.00017505	0.000913703
ILMN_3188984	20	20q13.13	ZFAS1	ZNFX1 antisense RNA 1	441951	0.853665	2.61561e-07	3.05163e-06
ILMN_2321064	19	19q13.33	BAX	BCL2 associated X, apoptosis regulator	581	0.853058	0.000334677	0.00162257
ILMN_1903159	14	14q23.1	PPM1A	protein phosphatase, Mg2+/Mn2+ dependent 1A	5494	0.853007	3.40771e-06	2.84879e-05
ILMN_1764851	20	20q13.12	TP53RK	TP53 regulating kinase	112858	0.852683	0.000179991	0.000936378
ILMN_1768470	3	3q27.1	EIF4G1	eukaryotic translation initiation factor 4 gamma 1	1981	0.852634	6.49449e-07	6.66778e-06
ILMN_1716766	19	19q13.11	CEBPG	CCAAT enhancer binding protein gamma	1054	0.851779	3.10857e-07	3.537e-06
ILMN_1717129	16	16p11.2	CDIPTOSP	CDIP transferase opposite strand, pseudogene	440356	0.851458	2.59115e-05	0.000168552
ILMN_1669433	10	10q22.2	ZSWIM8	zinc finger SWIM-type containing 8	23053	0.851439	1.93818e-07	2.35201e-06
ILMN_1710284	3	3q29	HES1	hes family bHLH transcription factor 1	3280	0.851011	7.13164e-05	0.000410468
ILMN_1657838	16	16p12.1	KDM8	lysine demethylase 8	79831	0.850886	0.000311997	0.00152552
[truncated: 7,374 more rows]
